# Supplementary material for: Identification of mildew resistance in wild and cultivated Central Asian grape germplasm
Source: PubMed Central journal article supplement (PMC3851849; doi:10.1186/1471-2229-13-149), 2013-10-04
Supplement: 1471-2229-13-149-S1.pdf [file 1471-2229-13-149-S1.pdf]

**Supplementary Table S1.** List of the 559 accessions and control reference varieties analyzed in the study. Country of origin codes are according to the ISO 3166-1 alpha 3 standards. Fifty-five genotypes with accession identification starting with "Turkmn" were introduced from the 'Turkmenian Experimental Station of Plant Genetic Resources, Garrygala, Turkmenistan' in 1996. Dr. Nolsulchak acquired ten accessions of *V. vinifera* subsp. *sylvestris* from Turkmenistan as seeds gathered from the Koptdag mountain range in 1993.

| <b>Accession ID</b> | <b>Repository</b> | <b>Accession Name</b>  | <b>Prime Variety Name</b> | <b>Country of origin/<br/>Source collection</b> | <b>Species<br/>Davis / Vassal</b> |
|---------------------|-------------------|------------------------|---------------------------|-------------------------------------------------|-----------------------------------|
|                     | Davis-Control1    | Chardonnay             | Chardonnay                | ITA                                             | <i>V. vinifera</i>                |
|                     | Davis-Control2    | Riesling               | Riesling                  | DEU                                             | "                                 |
|                     | Davis-Control3    | Thompson Seedless      | Sultanine                 | FRA                                             | "                                 |
|                     | Davis-Control4    | Zinfandel              | Primitivo                 | FRA                                             | "                                 |
|                     | Davis-Control5    | Pinot noir             |                           | FRA                                             | "                                 |
|                     | Davis-Control6    | Cabernet Sauvignon     |                           | FRA                                             | "                                 |
| 199Mtp1             | Vassal-Control1   | Chardonnay             | Chardonnay                | ITA                                             | "                                 |
| 274Mtp5             | Vassal-Control2   | Riesling               | Riesling                  | GRC                                             | "                                 |
| 1566Mtp2            | Vassal-Control3   | Sultanie ou Belabesses | Sultanine                 | FRA                                             | "                                 |
| 1277Mtp6            | Vassal-Control4   | Zinfandel              | Primitivo                 | FRA                                             | "                                 |
| 2076Mtp1            | Vassal            | A Kalatchel            | A Kalatchel               | IRN                                             | "                                 |
| 1979-0-2219-S1      | Davis             | A'asemi S1             |                           | YEM                                             | "                                 |
| DVIT0333            | Davis             | Ab Jusht               | Ab Jusht                  | AFG                                             | "                                 |
| 1748Mtp1            | Vassal            | Abdjouch               | Abjouch                   | "                                               | "                                 |

|              |        |                      |                                 |         |   |
|--------------|--------|----------------------|---------------------------------|---------|---|
| DVIT0305     | Davis  | Abla Aganin Isium    | Abla Aganyn Isyum (A. A. Isium) | USSR    | " |
| DVIT0327     | Davis  | Abla Aganin Isium    | Abla Aganyn Isyum (A. A. Isium) | "       | " |
| TYR VI 10-01 | Davis  | Abla Aganin Isium    |                                 | Unknown | " |
| TYR VI 10-03 | Davis  | Afuz-Ali Urmasti     |                                 | Unknown | " |
| 2842Mtp1     | Vassal | Ag Kiourdach p.e.    | Ag Kiourdach faux               | AZE     | " |
| TYR VI 10-05 | Davis  | Agaday               |                                 | Unknown | " |
| DVIT0334     | Davis  | Agadia               | Agadai (Agadia)                 | USSR    | " |
| TYR VI 10-07 | Davis  | Agadia               |                                 | Unknown | " |
| 2982Mtp1     | Vassal | Ahmeh Sal            | Ahmeh Sal apyrène               | IRN     | " |
| DVIT2037     | Davis  | Aitah                | Aita (Aitah)                    | AFG     | " |
| DVIT0336     | Davis  | Aitah Ghulaman       | Aitah Ghulaman                  | "       | " |
| DVIT0563     | Davis  | Ajmi                 | Ajmi                            | IRQ     | " |
| DVIT3154     | Davis  | Ajmi                 | Ajmi                            | Unknown | " |
| 2897Mtp1     | Vassal | Ak ouzioum tapapskii | Ak ouzioum tagapskii            | RUS     | " |
| DVIT0612     | Davis  | Ak Schekerek         | Ak Shekerek                     | TKM     | " |
| 2898Mtp1     | Vassal | Ak schekerek         | Ak chekerek                     | "       | " |
| Turkmn547    | Davis  | Ak Shekerek          |                                 | "       | " |
| DVIT0307     | Davis  | Al Borla             | al Borla                        | USSR    | " |
| DVIT0634     | Davis  | Alburla              | Alburla (Alburla)               | "       | " |

|                |        |               |               |         |   |
|----------------|--------|---------------|---------------|---------|---|
| Turkmn19652    | Davis  | Ali Shaitan   |               | TKM     | " |
| 2858Mtp1       | Vassal | Alia boka     | Alia boka     | UZB     | " |
| DVIT0337       | Davis  | Alloued Zeine | Alloued Zeine | LBN     | " |
| 1183Mtp1       | Vassal | Alü tierskü   | Alii tierskii | RUS     | " |
| DVIT0338       | Davis  | Alulu         | Alulu         | IRQ     | " |
| 0Mtp27         | Vassal | Anab E Shabi  | Anab-e-Shabi  | IND     | " |
| TYR VI 10-09   | Davis  | Anab-E-Shaki  | Anab-E-Shahi  | Unknown | " |
| 2113Mtp1       | Vassal | Aragatzi      | Aragatzi      | ARM     | " |
| 2001-9-8093-01 | Davis  | Asgari 01     |               | IRN     | " |
| DVIT0343       | Davis  | Askari        | Askari        | AFG     | " |
| DVIT3157       | Davis  | Askari        | Askari        | Unknown | " |
| 2088Mtp1       | Vassal | Askari        | Askari noir   | IRN     | " |
| DVIT0344       | Davis  | Askari Khari  | Askari Khari  | AFG     | " |
| DVIT0565       | Davis  | Askary        | Askary        | IRN     | " |
| 2083Mtp1       | Vassal | Askudi        | Askudi        | "       | " |
| DVIT0308       | Davis  | Asma          | Asma          | USSR    | " |
| DVIT2054       | Davis  | Asma          | Asma          | "       | " |
| DVIT0309       | Davis  | Asma Sohvars  | Asma Sohvars  | "       | " |
| 2505Mtp1       | Vassal | Assylkara     | Assyl kara    | RUS     | " |

|                |        |                 |                                   |            |   |
|----------------|--------|-----------------|-----------------------------------|------------|---|
| DVIT2085       | Davis  | Aswad           |                                   | YEM        | " |
| DVIT2087       | Davis  | Aswad           | Aswad                             | "          | " |
| DVIT2171       | Davis  | B 15-19         |                                   | Unknown    | " |
| DVIT2306       | Davis  | Baharat Early   |                                   | IND        | " |
| 2271Mtp2       | Vassal | Baian chirei    | Bayan Shirei                      | AZE        | " |
| DVIT0346       | Davis  | Baidh Ul Haman  | Baidh ul Haman                    | Unknown    | " |
| HOP VD19-01    | Davis  | Barbara         |                                   | USA        | " |
| DVIT2499       | Davis  | Bargoon         | Bargoon                           | PAK        | " |
| DVIT0310       | Davis  | Barmak Isium    | Barmak Isium                      | TUR        | " |
| 156Mtp1        | Vassal | Baxtiori        | Baxtiori                          | UZB        | " |
| 1749Mtp1       | Vassal | Bayad           | Bayad                             | YEM        | " |
| DVIT1841       | Davis  | Beli Potok      |                                   | Yugoslavia | " |
| DVIT2501       | Davis  | Berurargoon     | Berurargoon                       | PAK        | " |
| 1981-0-2233-S1 | Davis  | Bez el Anza S1  |                                   | EGY        | " |
| TYR VI 10-21   | Davis  | Bharat Early    |                                   | Unknown    | " |
| DVIT0311       | Davis  | Bias Kukuzeti   | Bias Kukuzeti                     | USSR       | " |
| 2001-9-8095-01 | Davis  | Bidaneh 01      |                                   | Unknown    | " |
| 2087Mtp1       | Vassal | Bidaneh Ghelmez | Askéri                            | IRN        | " |
| DVIT0358       | Davis  | Black Kishmish  | Kishmish Chernyi (Black Kishmish) | USSR       | " |

|              |        |                       |                                   |            |   |
|--------------|--------|-----------------------|-----------------------------------|------------|---|
| DVIT1326     | Davis  | Black Kishmish        | Kishmish Chernyi (Black Kishmish) | "          | " |
| DVIT2055     | Davis  | Black Kishmish        | Black Kishmish                    | RUS        | " |
| 1830Mtp1     | Vassal | Black Monucca         | Black Monukka                     | USA        | " |
| DVIT0312     | Davis  | Blanc De Crimei       | Blanc De Crimee (Blanc de Crimei) | USSR       | " |
| 2507Mtp1     | Vassal | Bouaki nor            | Bouaki nor                        | UZB        | " |
| 2509Mtp1     | Vassal | Boulany               | Bulanyi                           | RUS        | " |
| DVIT2496     | Davis  | Boyalsing I           | Boyalsing I                       | "          | " |
| DVIT2505     | Davis  | Boyalsing II          | Boyalsing II                      | "          | " |
| DVIT0673     | Davis  | Buaki                 |                                   | RUS        | " |
| DVIT2506     | Davis  | Budrilay              | Budrilay                          | PAK        | " |
| DVIT2512     | Davis  | Buraburi              | Buraburi                          | "          | " |
| TYR VI 11-11 | Davis  | Caus                  |                                   | Yugoslavia | " |
| TYR VI 11-13 | Davis  | Caus X Pearl Csaba    |                                   | "          | " |
| DVIT2308     | Davis  | Caus X Perle Of Csaba |                                   | "          | " |
| 2675Mtp1     | Vassal | Chaani blanc          | Chaani biely                      | AZE        | " |
| 2676Mtp1     | Vassal | Chaani noir           | Chaani tchernyi                   | "          | " |
| 2677Mtp2     | Vassal | Chakour angour        | Chakar angour de Tachkent         | UZB        | " |
| DVIT2730     | Davis  | Chamo                 | Chamo                             | PAK        | " |
| DVIT0613     | Davis  | Chan Isium            | Chan Isium                        | USSR       | " |

|              |        |                      |                         |         |   |
|--------------|--------|----------------------|-------------------------|---------|---|
| DVIT0371     | Davis  | Chaouch              | Chaouch blanc (Chaouch) | TUR     | " |
| DVIT0685     | Davis  | Charas               | Charas                  | USSR    | " |
| TYR VI 12-05 | Davis  | Charli Sar           |                         | IND     | " |
| 0Mtp225      | Vassal | Chassany             | Chassany                | AZE     | " |
| DVIT1088     | Davis  | Chaush White         | Chaush White            | TUR     | " |
| TYR VI 12-07 | Davis  | Chiradzouli White    |                         | USSR    | " |
| 1186Mtp1     | Vassal | Chirai (oback)       | Chirai obak             | TJK     | " |
| 2678Mtp2     | Vassal | Chirvan chakki       | Chirvan chakhi          | AZE     | " |
| Turkmn16392  | Davis  | Chol Uzyum           |                         | TKM     | " |
| DVIT2532     | Davis  | Churgoon             | Churgoon                | PAK     | " |
| DVIT0313     | Davis  | Cirmisi Sap De Sudak | Cirmisi Sap de Sudak    | USSR    | " |
| DVIT0384     | Davis  | Coudsi               | Dabouki (coudsi)        | Unknown | " |
| DVIT0388     | Davis  | Dabouki              | Dabouki                 | ISR     | " |
| DVIT1982     | Davis  | Dabouki              | Dabouki                 | "       | " |
| DVIT0569     | Davis  | Dais-el-anz          | Dais-el-anz             | IRQ     | " |
| DVIT2509     | Davis  | Dalnato I            | Dalnato I               | PAK     | " |
| DVIT2536     | Davis  | Dardari              | Dardari                 | "       | " |
| 635Mtp1      | Vassal | Dattier noir         | Hunisa                  | IRN     | " |
| 857Mtp1      | Vassal | De Hengril           | Kizliarsky              | RUS     | " |

|             |       |                   |            |      |   |
|-------------|-------|-------------------|------------|------|---|
| DVIT0314    | Davis | Demir Kara        | Demir Kara | USSR | " |
| Turkmn13358 | Davis | DK #01            |            | TKM  | " |
| Turkmn13359 | Davis | DK #02            |            | "    | " |
| Turkmn13360 | Davis | DK #03            |            | "    | " |
| Turkmn13361 | Davis | DK #04            |            | "    | " |
| Turkmn13362 | Davis | DK #05            |            | "    | " |
| Turkmn13364 | Davis | DK #07            |            | "    | " |
| Turkmn13365 | Davis | DK #08            |            | "    | " |
| Turkmn13366 | Davis | DK #09            |            | "    | " |
| Turkmn13388 | Davis | DK #10            |            | "    | " |
| Turkmn13387 | Davis | DK #11            |            | "    | " |
| Turkmn13386 | Davis | DK #12            |            | "    | " |
| Turkmn13381 | Davis | DK #17            |            | "    | " |
| Turkmn13389 | Davis | DK #2             |            | "    | " |
| Turkmn13379 | Davis | DK #21 Chernyi    |            | "    | " |
| Turkmn13377 | Davis | DK #39            |            | "    | " |
| Turkmn6272  | Davis | DK #9             |            | "    | " |
| Turkmn6977  | Davis | DK Belyi          |            | "    | " |
| Turkmn13375 | Davis | DK Melkii Chernyi |            | "    | " |

|                |        |                        |                       |      |   |
|----------------|--------|------------------------|-----------------------|------|---|
| Turkmn13374    | Davis  | DK Melkii Krasnyi      |                       | "    | " |
| Turkmn30743    | Davis  | DK N15 (#15)           |                       | "    | " |
| Turkmn6979     | Davis  | DK S Opushonnym Listom |                       | "    | " |
| 0Mtp318        | Vassal | Doppelaugen            | Doppel Augen          | AZE  | " |
| DVIT0315       | Davis  | Dschanim Isium         |                       | USSR | " |
| Turkmn6218     | Davis  | Ekdona Turkmenskaya    |                       | TKM  | " |
| 0Mtp354        | Vassal | Fachren blanc          | Fachren blanc         | AZE  | " |
| DVIT0316       | Davis  | Fachren Weis           |                       | USSR | " |
| DVIT0402       | Davis  | Fahri                  | Fahri Kalamak (Fahri) | AFG  | " |
| DVIT0403       | Davis  | Fahri Kalamak          | Fahri Kalamak         | "    | " |
| DVIT2510       | Davis  | Fatai                  | Fatai                 | PAK  | " |
| DVIT2636       | Davis  | Fayoumi                | Fayoumi               | EGY  | " |
| 0000-0-4432-S1 | Davis  | Fetyaska S1            |                       | RUS  | " |
| DVIT0615       | Davis  | Ganjehi                | Ganjehi               | IRN  | " |
| DVIT2537       | Davis  | Gaschochi              | Gaschochi             | PAK  | " |
| Turkmn3028     | Davis  | Gechi Kyrten           |                       | TKM  | " |
| 0Mtp414        | Vassal | Geok souli             | Kizil sapak           | "    | " |
| DVIT0409       | Davis  | Ghula Dani             | Ghula Dari            | AFG  | " |
| DVIT2039       | Davis  | Ghula Dari             | Ghula Dari            | "    | " |

|              |        |                               |                   |         |   |
|--------------|--------|-------------------------------|-------------------|---------|---|
| 0Mtp428      | Vassal | Golodan                       | Golodan           | "       | " |
| 0Mtp429      | Vassal | Gora Chirine n°1 (par erreur) | Gora Chirine faux | IRN     | " |
| DVIT0413     | Davis  | Gros Colman                   | Gros Colman       | USSR    | " |
| DVIT3164     | Davis  | Gros Colman                   | Gros Colman       | RUS     | " |
| DVIT2500     | Davis  | Gungargoon                    | Gungargoon        | PAK     | " |
| Turkmn3033   | Davis  | Gurgon                        |                   | TKM     | " |
| TYR VI 13-09 | Davis  | Guzal Kara                    |                   | UZB     | " |
| 0Mtp468      | Vassal | Guzal Kara                    | Guzal Kara        | "       | " |
| 0Mtp471      | Vassal | Haïtha                        | Haita safid       | AFG     | " |
| Turkmn6971   | Davis  | Halili Nobat Niyaz            |                   | TKM     | " |
| Turkmn6994   | Davis  | Han Uzyum                     |                   | "       | " |
| DVIT0416     | Davis  | Hassaine                      | Hassaine          | Unknown | " |
| DVIT2638     | Davis  | Hassaine                      | Hassaine          | Unknown | " |
| DVIT0417     | Davis  | Henab                         | Henab             | TUR     | " |
| DVIT0328     | Davis  | Himrisnky                     | Himrisnky         | USSR    | " |
| DVIT2175     | Davis  | Himrisnky                     | Himrisnky         | "       | " |
| DVIT0759     | Davis  | Hisakasy                      |                   | RUS     | " |
| Turkmn19806  | Davis  | Hiv Uzyum                     |                   | TKM     | " |
| DVIT2503     | Davis  | Hosargoon                     | Hosargoon         | PAK     | " |

|              |        |                             |                                               |         |   |
|--------------|--------|-----------------------------|-----------------------------------------------|---------|---|
| 0Mtp484      | Vassal | Houssein blanc (par erreur) | Houssein rouge                                | IRN     | " |
| TYR VI 13-15 | Davis  | Huseine Rozvoj              |                                               | Unknown | " |
| DVIT0419     | Davis  | Husseine                    | Husseine                                      | AFG     | " |
| DVIT0420     | Davis  | Husseine                    | Husseine                                      | "       | " |
| DVIT0576     | Davis  | Husseine                    | Husseine                                      | "       | " |
| DVIT0421     | Davis  | Husseive                    | Husseine (Rish Baba)                          | "       | " |
| DVIT2050     | Davis  | Husseive                    | Husseine                                      | "       | " |
| 2086Mtp1     | Vassal | Inconnu blanc               | Blanc d'Iran (Charif)                         | IRN     | " |
| 1752Mtp1     | Vassal | Irki ou Ergi                | Irki                                          | YEM     | " |
| Turkmn3026   | Davis  | Irtyk Yaprak                |                                               | TKM     | " |
| DVIT2508     | Davis  | Ishkin                      | Ishkin                                        | PAK     | " |
| DVIT2677     | Davis  | Itchkimar                   | Itchkimar                                     | RUS     | " |
| 2845Mtp1     | Vassal | Itchkimar biely             | Itchkimar biely faux<br>(Collection Kichinev) | UZB     | " |
| 1221Mtp2     | Vassal | Itshkimar                   | Ichkimar                                      | "       | " |
| TYR VI 13-17 | Davis  | Jane De Smirna              |                                               | Unknown | " |
| TYR VI 13-19 | Davis  | Jefferson Persian R27       |                                               | Unknown | " |
| 2679Mtp1     | Vassal | Joumalak blanc              | Yumalak lelyi                                 | UZB     | " |
| DVIT0766     | Davis  | Kabajink                    | Kabajink                                      | Unknown | " |
| DVIT2497     | Davis  | Kabuli                      | Kabuli                                        | PAK     | " |

|              |        |                 |                  |         |   |
|--------------|--------|-----------------|------------------|---------|---|
| DVIT0317     | Davis  | Kakourdess Weis | Kakourdess Biely | USSR    | " |
| DVIT2534     | Davis  | Kala Kostan     | Kala Kostan      | PAK     | " |
| DVIT0335     | Davis  | Kalamak         | Kalamak Safid    | AFG     | " |
| DVIT2917     | Davis  | Kali Sag        |                  | Unknown | " |
| TYR VI 13-21 | Davis  | Kali Sag        |                  | Unknown | " |
| 657Mtp1      | Vassal | Kalily          | Khalili belyi    | IRN     | " |
| 2663Mtp2     | Vassal | Kalily noir     | Khalili tcherni  | "       | " |
| DVIT0428     | Davis  | Kandahar        | Kandhari Kara    | Unknown | " |
| HOP L06-23   | Davis  | Kandahar        |                  | Unknown | " |
| 2908Mtp1     | Vassal | Kandahar        | Kandahar         | USA     | " |
| DVIT0429     | Davis  | Kandahari       | Kandahari Siah   | AFG     | " |
| 1746Mtp1     | Vassal | Kandari noir    | Kandahari siah   | "       | " |
| DVIT2918     | Davis  | Kandhar         |                  | Unknown | " |
| TYR VI 13-23 | Davis  | Kandhar         |                  | Unknown | " |
| DVIT2081     | Davis  | Kandhari        |                  | IND     | " |
| TYR VI 14-01 | Davis  | Kandhari        |                  | Unknown | " |
| 0Mtp565      | Vassal | Kanfet isium    | Kanfet isioum    | RUS     | " |
| TYR VI 14-03 | Davis  | Kara Djandjal   |                  | USSR    | " |
| 2277Mtp1     | Vassal | Kara Djandjal   | Djandjal kara    | UZB     | " |

|              |        |                                |                           |         |   |
|--------------|--------|--------------------------------|---------------------------|---------|---|
| DVIT2322     | Davis  | Kara Dzhidzhigi                | Kara Dzhidzhigi           | "       | " |
| Turkmn6255   | Davis  | Kara Dzhidzhigi                |                           | TKM     | " |
| TYR VI 14-05 | Davis  | Kara Dzhidzhigi                |                           | Unknown | " |
| 2690Mtp1     | Vassal | Kara Kaltak                    | Kara Kaltak               | UZB     | " |
| DVIT0773     | Davis  | Kara Lakana                    | Kara Lakana               | USSR    | " |
| 2276Mtp1     | Vassal | Kara ouzume<br>d'Aschkhabadsky | Kara ouzume Aschkhabadsky | TKM     | " |
| 2780Mtp1     | Vassal | Kara Palvan                    | Kara Palvan               | UZB     | " |
| Turkmn6982   | Davis  | Kara Terbash                   |                           | TKM     | " |
| Turkmn551    | Davis  | Kara Uzyum Ashhabadskii        |                           | "       | " |
| Turkmn3036   | Davis  | Kara Uzyum Nuhurskii           |                           | "       | " |
| DVIT2703     | Davis  | Karabournov                    | Karabournov               | Unknown | " |
| DVIT2323     | Davis  | Karadzhandal                   | Karadzhandal              | USSR    | " |
| TYR VI 14-07 | Davis  | Karazhumdal                    |                           | Unknown | " |
| Turkmn21551  | Davis  | Karga Dili                     |                           | TKM     | " |
| Turkmn6981   | Davis  | Kash Uzyum                     |                           | "       | " |
| DVIT2451     | Davis  | Kashiri                        | Kashiri                   | PAK     | " |
| DVIT2103     | Davis  | Kastour Rumi                   | Kastour Rumi              | EGY     | " |
| 1738Mtp1     | Vassal | Katta                          | Kata                      | AFG     | " |
| 556Mtp2      | Vassal | Katta kourgan                  | Katta-kourgan             | UZB     | " |

|              |        |                      |                              |         |   |
|--------------|--------|----------------------|------------------------------|---------|---|
| TYR VI 14-09 | Davis  | Katta Kourgane       |                              | Unknown | " |
| DVIT0774     | Davis  | Katta Kurgan         | Katta Kourgan (Katta Kurgan) | USSR    | " |
| 2951Mtp1     | Vassal | Kaytagi              | Kaitagi                      | RUS     | " |
| 1679Mtp2     | Vassal | Kechmisch ali violet | Kechmisch aly violet         | IRN     | " |
| DVIT0580     | Davis  | Keshmesh             |                              | IRN     | " |
| Turkmn29892  | Davis  | Keshmesh Heshrau     |                              | TKM     | " |
| ARM Q01-20   | Davis  | Keshmesh Zeravshan   |                              | "       | " |
| DVIT0430     | Davis  | Khalchili            | Khalchili                    | AFG     | " |
| DVIT0431     | Davis  | Khalchili            | Khalchili                    | "       | " |
| DVIT0432     | Davis  | Khaldar              | Khaldar                      | "       | " |
| DVIT0433     | Davis  | Khalili              |                              | "       | " |
| DVIT2040     | Davis  | Khalili              |                              | "       | " |
| DVIT2084     | Davis  | Khalili              | Khalili                      | "       | " |
| 0Mtp1473     | Vassal | Khan isium           | Khan ousioum femelle         | TKM     | " |
| 2190Mtp1     | Vassal | Khatmi               | Khatmi                       | RUS     | " |
| DVIT2919     | Davis  | Khawngi              |                              | IND     | " |
| TYR VI 14-11 | Davis  | Khawngi              |                              | Unknown | " |
| 2664Mtp1     | Vassal | Khindogny            | Khindogny                    | IRN     | " |
| DVIT0434     | Davis  | Khir Ghulaman        | Khir Ghulaman                | AFG     | " |

|              |        |                                 |                                   |         |   |
|--------------|--------|---------------------------------|-----------------------------------|---------|---|
| DVIT2605     | Davis  | Khorestini                      | Khorestini                        | PAK     | " |
| 1227Mtp2     | Vassal | Khoussainé blanc                | Khoussainé blanc                  | UZB     | " |
| DVIT2075     | Davis  | Khusaine Red                    | Khusaine Red                      | USSR    | " |
| PI 349737    | Davis  | Khusaine White                  |                                   | UZB     | " |
| 2781Mtp1     | Vassal | Kibraïski                       | Kibraïski                         | "       | " |
| 0Mtp1491     | Vassal | Kichmich noir                   | Kichmich tcherni                  | TUR     | " |
| DVIT2495     | Davis  | Kini Yatch                      | Kini Yatch                        | PAK     | " |
| 1678Mtp5     | Vassal | Kischmisch                      | Kichmich rond                     | TUR     | " |
| DVIT0435     | Davis  | Kishmish                        | Kishmishi                         | AFG     | " |
| TYR VI 14-15 | Davis  | Kishmish Charni                 |                                   | Unknown | " |
| DVIT2325     | Davis  | Kishmish Charni                 | Kishmish-charni                   | IND     | " |
| DVIT2324     | Davis  | Kishmish Early                  | Kishmish Early                    | UZB     | " |
| TYR VI 14-17 | Davis  | Kishmish Early                  |                                   | Unknown | " |
| DVIT1103     | Davis  | Kishmish Hishrau                | Kishmish Khishrau                 | UZB     | " |
| Turkmn6999   | Davis  | Kishmish Krasnyi<br>Turkmenskii |                                   | TKM     | " |
| DVIT2071     | Davis  | Kishmish Of Vir                 | Kishmish (of) Vir                 | USSR    | " |
| DVIT2074     | Davis  | Kishmish Of Vir                 | Kishmish (of) Vir                 | RUS     | " |
| DVIT0437     | Davis  | Kishmish Sorkh                  | Kishmish Sorkh                    | AFG     | " |
| DVIT2041     | Davis  | Kishmish Sorkh                  | Kishmish Sorh (Kishmish<br>Sorkh) | "       | " |

|                |        |                     |                   |            |   |
|----------------|--------|---------------------|-------------------|------------|---|
| DVIT0438       | Davis  | Kishmish Spien      | Kishmish Spien    | "          | " |
| DVIT0436       | Davis  | Kishmishi           | Kishmishi         | "          | " |
| DVIT0439       | Davis  | Kishmishi           |                   | "          | " |
| TYR VI 14-19   | Davis  | Kishmishi           |                   | Unknown    | " |
| 0Mtp587        | Vassal | Kishmishi siogag    | Sahebi            | AFG        | " |
| 0Mtp589        | Vassal | Kisil izium         | Kizil ousum faux  | RUS        | " |
| 746Mtp1        | Vassal | Kisil sapak         | Kizil sapak faux  | "          | " |
| 20008-14 B     | Davis  | Kismish Vatkana     |                   | UZB        | " |
| Turkmn19697    | Davis  | Kismish Turkmenskii |                   | TKM        | " |
| Turkmn545      | Davis  | Kizil Sapak         |                   | "          | " |
| DVIT2077       | Davis  | Klusaine Red        | Khusaine Red      | USSR       | " |
| 2001-9-8100-01 | Davis  | Kondori 01          |                   | IRN        | " |
| DVIT0783       | Davis  | Koptcha             | Kopchak (Koptcha) | RUS        | " |
| 0Mtp610        | Vassal | Korisa kechmich     | Korza erevani     | ARM        | " |
| DVIT2680       | Davis  | Kouldjinski         | Kouldjinski       | RUS        | " |
| DVIT0329       | Davis  | Kovalewka           | Kovalevka         | USSR       | " |
| 2635Mtp1       | Vassal | Koz ouzioum         | Koz ouzioum       | RUS        | " |
| DVIT1070       | Davis  | Kule Dary           | Kule Dary         | Unknown    | " |
| TYR VI 14-21   | Davis  | Kulidzhinski        |                   | Yugoslavia | " |

|                |        |                 |                     |      |   |
|----------------|--------|-----------------|---------------------|------|---|
| Turkmn18820    | Davis  | Kush Dzhumurtka |                     | TKM  | " |
| DVIT2452       | Davis  | Kwar II         | Kwar II             | PAK  | " |
| DVIT0441       | Davis  | Lal             | Lal                 | AFG  | " |
| DVIT0442       | Davis  | Lal Sorkh       | Lal Sorh            | "    | " |
| ARM Q01-16     | Davis  | Late Vavilov    |                     | TKM  | " |
| Turkmn29890    | Davis  | Late Vavilov    |                     | "    | " |
| DVIT2641       | Davis  | Leanoy          | Leanoy              | USSR | " |
| 0Mtp1475       | Vassal | Liali bidona    | Vardabouire         | AZE  | " |
| 0Mtp640        | Vassal | Liali Iakdona   | Liali Yakdona       | KAZ  | " |
| 2640Mtp1       | Vassal | Lkeni noir      | Lkeny chernyi       | AZE  | " |
| 0Mtp1449       | Vassal | Malahy          | Malahy              | IRN  | " |
| Turkmn3025     | Davis  | Mamidon         |                     | TKM  | " |
| Turkmn6984     | Davis  | Mamidon Deli    |                     | "    | " |
| Turkmn21604    | Davis  | Mamidon Kizil   |                     | "    | " |
| 0Mtp703        | Vassal | Matrassa        | Matrassa blanc faux | RUS  | " |
| 2642Mtp2       | Vassal | Matrassa        | Matrassa            | AZE  | " |
| 2001-9-8101-01 | Davis  | Mehdi 01        |                     | IRN  | " |
| 2082Mtp1       | Vassal | Mehdik          | Mehdik              | "    | " |
| Turkmn3030     | Davis  | Mellei          |                     | TKM  | " |

|              |        |                        |                           |         |   |
|--------------|--------|------------------------|---------------------------|---------|---|
| DVIT1042     | Davis  | Mermark                | Mermark                   | IRQ     | " |
| Turkmn6217   | Davis  | Meshei                 |                           | TKM     | " |
| 0Mtp1795     | Vassal | Mesisti rose           | Mesisti                   | RUS     | " |
| DVIT2498     | Davis  | Millishun              | Millishun                 | PAK     | " |
| 1742Mtp1     | Vassal | Monaca                 | Monaca                    | AFG     | " |
| DVIT0460     | Davis  | Monakka                | Monakka                   | "       | " |
| DVIT0462     | Davis  | Monukka                |                           | "       | " |
| 0Mtp750      | Vassal | Mouchketny             | Mouchketny faux           | RUS     | " |
| DVIT0319     | Davis  | Mourvedre Famellestadt | Mourvèdre Famellestadt    | USSR    | " |
| DVIT2046     | Davis  | Munuka Sufed           | Munuka Sufed              | AFG     | " |
| DVIT0320     | Davis  | Mursa Isium            | Murza Isyum (Murma Isium) | USSR    | " |
| TYR VI 15-13 | Davis  | Mzivani                |                           | Unknown | " |
| DVIT2511     | Davis  | Namonia                | Namonia                   | PAK     | " |
| 1741Mtp1     | Vassal | Naosé                  | Naosé                     | AFG     | " |
| 2648Mtp2     | Vassal | Narma                  | Narma                     | RUS     | " |
| 0Mtp780      | Vassal | Nassau                 | Nassau                    | "       | " |
| DVIT2514     | Davis  | Neeli                  | Neeli                     | PAK     | " |
| DVIT2507     | Davis  | Neelilay               | Neelilay                  | "       | " |
| Turkmn30746  | Davis  | Neriiski               |                           | TKM     | " |

|              |        |                           |                                  |      |   |
|--------------|--------|---------------------------|----------------------------------|------|---|
| Turkmn13368  | Davis  | Neriiskii                 |                                  | "    | " |
| DVIT2504     | Davis  | Nilok                     | Nilok                            | PAK  | " |
| TYR VI 15-17 | Davis  | Nimrang                   |                                  | RUS  | " |
| TYR VI 15-19 | Davis  | Nimrang                   |                                  | "    | " |
| DVIT0476     | Davis  | Nimrang #58               | Nimrang (Nimrang #58)            | USSR | " |
| 2736Mtp1     | Vassal | Nimrang rouge             | Nimrang rouge                    | UZB  | " |
| DVIT0330     | Davis  | Noir D'automne            | Noir d' Automne (Noir D'automne) | USSR | " |
| DVIT2683     | Davis  | Norakert PRG 2224         | Norakert PRG 2224                | RUS  | " |
| DVIT2533     | Davis  | Nosargoon                 | Nosargoon                        | PAK  | " |
| 2649Mtp1     | Vassal | Noulizok                  | Noulizok                         | UZB  | " |
| DVIT2045     | Davis  | Nunaka Sia                | Nunaka Sia                       | AFG  | " |
| 2650Mtp1     | Vassal | Obak blanc                | Obak biely                       | UZB  | " |
| 0Mtp828      | Vassal | Oeil de Dragon            | Long Yan                         | CHN  | " |
| 2854Mtp1     | Vassal | Oktiabrskii               | Oktiabrskii                      | UZB  | " |
| Turkmn30748  | Davis  | Orion                     |                                  | TKM  | " |
| 2952Mtp1     | Vassal | Otscha bala               | Otcha bala                       | UZB  | " |
| 2075Mtp1     | Vassal | Ozaan Daii                | Ozaan Daii                       | IRN  | " |
| DVIT2282     | Davis  | Pakistan Collection 25168 |                                  | PAK  | " |
| DVIT2269     | Davis  | Pakistan Collection 25180 |                                  | "    | " |

|          |        |                           |         |  |     |   |
|----------|--------|---------------------------|---------|--|-----|---|
| DVIT2270 | Davis  | Pakistan Collection 25193 |         |  | "   | " |
| DVIT2262 | Davis  | Pakistan Collection 25206 |         |  | "   | " |
| DVIT2273 | Davis  | Pakistan Collection 25226 |         |  | "   | " |
| DVIT2261 | Davis  | Pakistan Collection 25227 |         |  | "   | " |
| DVIT2267 | Davis  | Pakistan Collection 25234 |         |  | "   | " |
| DVIT2272 | Davis  | Pakistan Collection 25237 |         |  | "   | " |
| DVIT2271 | Davis  | Pakistan Collection 25241 |         |  | "   | " |
| DVIT2281 | Davis  | Pakistan Collection 25246 |         |  | "   | " |
| DVIT2268 | Davis  | Pakistan Collection 25258 |         |  | "   | " |
| DVIT2293 | Davis  | Pakistan Collection 25265 |         |  | "   | " |
| DVIT2263 | Davis  | Pakistan Collection 25275 |         |  | "   | " |
| DVIT2266 | Davis  | Pakistan Collection 25281 |         |  | "   | " |
| DVIT2296 | Davis  | Pakistan Collection 25290 |         |  | "   | " |
| DVIT2283 | Davis  | Pakistan Collection 25296 |         |  | "   | " |
| DVIT2291 | Davis  | Pakistan Collection 25305 |         |  | "   | " |
| DVIT2264 | Davis  | Pakistan Collection 25311 |         |  | "   | " |
| DVIT2502 | Davis  | Paragoon                  |         |  | "   | " |
| 2691Mtp1 | Vassal | Parkentskii               | Parkent |  | UZB | " |
| 2597Mtp1 | Vassal | Peikani                   | Peikani |  | IRN | " |

|              |        |                                 |                        |         |   |
|--------------|--------|---------------------------------|------------------------|---------|---|
| 0Mtp865      | Vassal | Pejnery blanc                   | Peñeri                 | IRN     | " |
| TYR VI 16-03 | Davis  | Persian                         |                        | Unknown | " |
| DVIT2755     | Davis  | Persian R27                     |                        | Unknown | " |
| 2651Mtp2     | Vassal | Pervenetz Praskoveisky          | Pervenetz praskoveïsky | RUS     | " |
| 2788Mtp1     | Vassal | Pin el pou tao                  | Pinger putao           | CHN     | " |
| Turkmn19735  | Davis  | Porsi Shekerek                  |                        | TKM     | " |
| DVIT0321     | Davis  | Precoce d'Astrachan             |                        | USSR    | " |
| 0Mtp928      | Vassal | Précoce d'Astrakan              | Bekalny                | RUS     | " |
| 0Mtp950      | Vassal | Rajulan                         | Rajoulan               | UZB     | " |
| DVIT2684     | Davis  | Ranny Vira                      |                        | RUS     | " |
| 2654Mtp1     | Vassal | Ranny Vira                      | Rannii Vira            | "       | " |
| 2737Mtp1     | Vassal | Razakiia piembiana              | Razaki pembe           | "       | " |
| 1750Mtp1     | Vassal | Raziki ou Razaki                | Raziki                 | YEM     | " |
| DVIT0499     | Davis  | Red Ohanez                      |                        | RUS     | " |
| TYR VI 16-09 | Davis  | Rhazaki (Pa 1882)               |                        | Unknown | " |
| TYR VI 16-11 | Davis  | Rhazaki (Pb 1886)<br>(Dattier?) |                        | Unknown | " |
| TYR VI 16-13 | Davis  | Rhazaki (Pg 1887)               |                        | Unknown | " |
| DVIT0608     | Davis  | Rhazaki Anatolico               |                        | GRC     | " |
| DVIT0554     | Davis  | Rhazaki Arhanon                 |                        | Unknown | " |

|            |        |                     |                        |         |   |
|------------|--------|---------------------|------------------------|---------|---|
| DVIT0501   | Davis  | Rhazaki De Crete    |                        | GRC     | " |
| DVIT0555   | Davis  | Rhazaki Mavro       |                        | Unknown | " |
| HOP L04-19 | Davis  | Rish Baba           |                        | Unknown | " |
| DVIT2338   | Davis  | Rizamat             |                        | UZB     | " |
| 2783Mtp1   | Vassal | Rouchaki            | Rouchaki               | USSR    | " |
| DVIT0507   | Davis  | Rozovii Kishmish    |                        | "       | " |
| DVIT3077   | Davis  | Sabalkanskoi        | Dabouki (Sabalkanskoi) | Unknown | " |
| 0Mtp1007   | Vassal | Sabs angur          | Sabza angur            | TJK     | " |
| 2090Mtp1   | Vassal | Sahami              | Sahami                 | IRN     | " |
| DVIT0508   | Davis  | Sahebi              |                        | AFG     | " |
| DVIT0509   | Davis  | Sahibi              |                        | "       | " |
| DVIT0510   | Davis  | Sahibi Sorkh        |                        | "       | " |
| 2078Mtp1   | Vassal | Sahilii             | Sahilii                | IRN     | " |
| 0Mtp1010   | Vassal | Saïd guliami        | Saïd guliami           | UZB     | " |
| DVIT0511   | Davis  | Saidi-Gulami        |                        | USSR    | " |
| Turkmn6987 | Davis  | Sary Aygyr          |                        | TKM     | " |
| 0Mtp1031   | Vassal | Sary Kiriak         | Sary Kirak             | AZE     | " |
| 388Mtp2    | Vassal | Sateni tcherni      | Sateni tcherny         | ARM     | " |
| 1737Mtp1   | Vassal | Schiradzouli violet | Schiradzouli violet    | IRN     | " |

|                |        |                      |                                    |            |   |
|----------------|--------|----------------------|------------------------------------|------------|---|
| DVIT2604       | Davis  | Schwin               |                                    | PAK        | " |
| DVIT1152       | Davis  | Selection 2798       |                                    | Yugoslavia | " |
| DVIT2653       | Davis  | Sereksiya Rosavi     |                                    | RUS        | " |
| DVIT0331       | Davis  | Setzlinge Dodreliabi | Gros Colman (Setzlinge Dodreliabi) | USSR       | " |
| 2001-9-7097-01 | Davis  | Shahani 01           |                                    | IRN        | " |
| TYR VI 16-21   | Davis  | Shakar Angur         |                                    | USSR       | " |
| DVIT0520       | Davis  | Shando Khani         | Shando Khari                       | AFG        | " |
| DVIT0521       | Davis  | Shindu Khani         | Shindu Khari                       | "          | " |
| DVIT2603       | Davis  | Shingargoon          |                                    | PAK        | " |
| 2079Mtp1       | Vassal | Shirazi              | Shirazi                            | IRN        | " |
| DVIT2168       | Davis  | Shtur Angur          |                                    | USSR       | " |
| DVIT2513       | Davis  | Shuwarti             |                                    | PAK        | " |
| 2074Mtp1       | Vassal | Siah                 | Siah                               | IRN        | " |
| DVIT0522       | Davis  | Siar                 |                                    | AFG        | " |
| 2681Mtp1       | Vassal | Siborskory           | Sibirkovy                          | RUS        | " |
| DVIT1126       | Davis  | Sochal               |                                    | USSR       | " |
| DVIT2340       | Davis  | Sochal Kara-kash     |                                    | "          | " |
| 2657Mtp1       | Vassal | Soiaki               | Soiaki                             | UZB        | " |
| DVIT0597       | Davis  | Solaimani            | Salomani                           | IRQ        | " |

|              |        |                        |                                |         |   |
|--------------|--------|------------------------|--------------------------------|---------|---|
| 0Mtp1071     | Vassal | Soultani (avec graine) | Soultani (Collection Kichinev) | UZB     | " |
| 2856Mtp1     | Vassal | Sourkhak bely          | Sourkhak biely                 | "       | " |
| DVIT2602     | Davis  | Spin Ugad              |                                | PAK     | " |
| DVIT0332     | Davis  | Stambulari             | Stambulari (Stambul Ali)       | USSR    | " |
| 0Mtp1073     | Vassal | Starinky               | Starinky                       | RUS     | " |
| 2857Mtp1     | Vassal | Stour Angour           | Chtour angour                  | UZB     | " |
| DVIT0526     | Davis  | Sultana                |                                | RUS     | " |
| DVIT1321     | Davis  | Sultani                | Sultana                        | USSR    | " |
| DVIT0530     | Davis  | Sultanina Rose         |                                | RUS     | " |
| 0Mtp1597     | Vassal | Sultanine noire        | Sultanine noire faux           | UZB     | " |
| Turkmn6304   | Davis  | Sumbarskii Bekyi       |                                | TKM     | " |
| 2659Mtp1     | Vassal | Tagobi                 | Tagobi                         | TJK     | " |
| DVIT2174     | Davis  | Taifi                  |                                | USSR    | " |
| TYR VI 16-23 | Davis  | Taifi                  |                                | Unknown | " |
| 1192Mtp1     | Vassal | Taifi rose             | Taifi rosovy                   | UZB     | " |
| TYR VI 17-01 | Davis  | Taifi Rosmovyi         |                                | USSR    | " |
| TYR VI 17-03 | Davis  | Taka Sago              |                                | JPN     | " |
| 2661Mtp2     | Vassal | Tana kouzy             | Tana kouzy                     | UZB     | " |
| DVIT2928     | Davis  | Tana-Kuzi              |                                | Unknown | " |

|                |        |                     |                 |         |   |
|----------------|--------|---------------------|-----------------|---------|---|
| TYR VI 17-05   | Davis  | Tana-Kuzi           |                 | USSR    | " |
| TYR VI 17-07   | Davis  | Tarnau              |                 | "       | " |
| TYR VI 17-09   | Davis  | Tasch Buaky         |                 | Unknown | " |
| 1218Mtp1       | Vassal | Tavkveri            | Tavkveri        | AZE     | " |
| DVIT2688       | Davis  | Tchilar             |                 | RUS     | " |
| 2671Mtp1       | Vassal | Tchiliaki blanc     | Tchiliaki belyi | TJK     | " |
| 2221Mtp1       | Vassal | Terbach             | Terbasch        | TKM     | " |
| Turkmn549      | Davis  | Terbash             |                 | "       | " |
| 1985Mtp2       | Vassal | Tolstokory          | Tolstokorii     | RUS     | " |
| DVIT2531       | Davis  | Torgoon             |                 | PAK     | " |
| 0000-0-2411-S1 | Davis  | Trapanlarin kara S1 |                 | USSR    | " |
| 0Mtp1148       | Vassal | Tscharma            | Tscharma        | UZB     | " |
| 664Mtp1        | Vassal | Tschetirbak         | Tchatyrbac      | "       | " |
| DVIT0539       | Davis  | Tschilaci           |                 | RUS     | " |
| 1985-0-2415-S1 | Davis  | Tufachi S1          |                 | ISR     | " |
| 2760Mtp1       | Vassal | Tuia tiche          | Tuia-tiche      | UZB     | " |
| 654Mtp1        | Vassal | Tuia-tiche p.e.     | Kok pandas      | RUS     | " |
| TYR VI 17-11   | Davis  | Uzbekistan Muscat   |                 | Unknown | " |
| TYR VI 17-12   | Davis  | Uzbekistan Muscat   |                 | Unknown | " |

|                |        |                      |                        |            |                      |
|----------------|--------|----------------------|------------------------|------------|----------------------|
| DVIT2072       | Davis  | Uzbekistanian Muscat |                        | USSR       | "                    |
| 0Mtp1165       | Vassal | Varuschkin           | Varyoshkin             | RUS        | "                    |
| 126Mtp2        | Vassal | Vassarga blanc       | Vassarga bielaia       | UZB        | "                    |
| 2510Mtp1       | Vassal | Vassarga tchernaia   | Vassarga tchernaia     | "          | "                    |
| TYR VI 17-15   | Davis  | Vitis Vinifera #1359 |                        | "          | "                    |
| 1983-0-2424-S1 | Davis  | Voivoginiova S1      |                        | USSR       | "                    |
| TYR VI 17-17   | Davis  | Volgo Don            |                        | UZB        | "                    |
| 1736Mtp5       | Vassal | Weisse Schirastraube | Schiradzouli = Tebrizi | IRN        | "                    |
| DVIT0604       | Davis  | Yaghotti No. 1       |                        | "          | "                    |
| DVIT2052       | Davis  | Yaghotti No. 2       |                        | "          | "                    |
| 2687Mtp1       | Vassal | Yaï izium rose       | Yaï isioum rosovy      | RUS        | "                    |
| TYR VI 17-19   | Davis  | Yarghouti            |                        | Unknown    | "                    |
| 2077Mtp1       | Vassal | Yhsouh Ali           | Yhsouh ali             | IRN        | "                    |
| 0Mtp1798       | Vassal | Zarevoï              | Zorevoi                | RUS        | "                    |
| DVIT0606       | Davis  | Zerk                 |                        | IRQ        | "                    |
| 2666Mtp1       | Vassal | Zimliansky noir      | Tzimlansky chernyi     | RUS        | "                    |
| DVIT2664       | Davis  | Zimsko Belo          |                        | Yugoslavia | "                    |
| TYR VI 17-21   | Davis  | Zimsko Belo          |                        | Unknown    | "                    |
| DVIT2442.1     | Davis  | Arybata              |                        | TKM        | <i>V. sylvestris</i> |

|             |       |             |     |   |
|-------------|-------|-------------|-----|---|
| DVIT2442.6  | Davis | Arybata     | "   | " |
| DVIT2440.1  | Davis | Ayedere     | "   | " |
| DVIT2440.9  | Davis | Ayedere     | "   | " |
| DVIT2445.12 | Davis | Kara Kaytak | "   | " |
| DVIT2444.19 | Davis | Kochtemyr   | "   | " |
| DVIT2447.4  | Davis | Uzuntakoy   | "   | " |
| DVIT2447.9  | Davis | Uzuntakoy   | "   | " |
| DVIT2446.9  | Davis | Yuvankala   | "   | " |
| DVIT2446.12 | Davis | Yuvankala   | "   | " |
| DVIT1799    | Davis | O30-51      | AFG | " |
| DVIT1800    | Davis | O30-53      | "   | " |
| DVIT1798    | Davis | O30-44      | IRN | " |
| DVIT1801    | Davis | O33-50      | "   | " |
| DVIT1802    | Davis | O33-60      | "   | " |
| DVIT1803    | Davis | O34-16      | "   | " |
| DVIT1804    | Davis | O34-29      | "   | " |
| DVIT1805    | Davis | O34-46      | "   | " |
| DVIT1806    | Davis | O34-54      | "   | " |
| DVIT1807    | Davis | O34-55      | "   | " |

|             |       |                      |     |   |
|-------------|-------|----------------------|-----|---|
| DVIT1808    | Davis | O35-07               | "   | " |
| DVIT1809    | Davis | O35-11               | "   | " |
| DVIT1811    | Davis | O35-41               | "   | " |
| DVIT1812    | Davis | O35-47               | "   | " |
| DVIT1813    | Davis | O35-50               | "   | " |
| DVIT1814    | Davis | O35-58               | "   | " |
| DVIT1816    | Davis | O35-64               | "   | " |
| DVIT3355.4  | Davis | <i>V. sylvestris</i> | ARM | " |
| DVIT3355.5  | Davis | <i>V. sylvestris</i> | "   | " |
| DVIT3353.31 | Davis | <i>V. sylvestris</i> | "   | " |
| DVIT3353.43 | Davis | <i>V. sylvestris</i> | "   | " |
| DVIT3351.23 | Davis | <i>V. sylvestris</i> | "   | " |
| DVIT3351.27 | Davis | <i>V. sylvestris</i> | "   | " |
| DVIT3356.38 | Davis | <i>V. sylvestris</i> | "   | " |
| DVIT3356.33 | Davis | <i>V. sylvestris</i> | "   | " |
| DVIT3350.25 | Davis | <i>V. sylvestris</i> | GEO | " |
| DVIT3350.2  | Davis | <i>V. sylvestris</i> | "   | " |
| DVIT3348.14 | Davis | <i>V. sylvestris</i> | "   | " |
| DVIT3348.17 | Davis | <i>V. sylvestris</i> | "   | " |

|             |            |                      |         |                              |
|-------------|------------|----------------------|---------|------------------------------|
| DVIT3357.30 | Davis      | <i>V. sylvestris</i> | "       | "                            |
| DVIT3357.4  | Davis      | <i>V. sylvestris</i> | "       | "                            |
| DVIT3349.12 | Davis      | <i>V. sylvestris</i> | "       | "                            |
| DVIT3349.8  | Davis      | <i>V. sylvestris</i> | "       | "                            |
| 545685      | Geneva. NY | 545685               | Unknown | <i>Ampelopsis delavayana</i> |
| GVIT 859    | Geneva. NY | 597257.03            | CHN     | <i>V. piasezkii</i>          |
| 588421      | Geneva. NY | 588421.a             | "       | <i>V. yenshanensis</i>       |
| 588422      | Geneva. NY | 588422.a             | "       | <i>V. yenshanensis</i>       |
| GVIT 813    | Geneva, NY | 588451.c             | USSR    | <i>V. coignetiae</i>         |
| GVIT0814    | Geneva, NY | 588452.b             | "       | <i>V. amurensis</i>          |
| 588650      | Geneva. NY | 588650.a             | CHN     | <i>V. yenshanensis</i>       |
| 597294.01   | Geneva. NY | A-166-003            | "       | <i>Vitis species</i>         |
| DVIT1158.4  | Davis      | <i>amurensis</i>     | "       | <i>V. amurensis</i>          |
| DVIT1157.12 | Davis      | <i>amurensis</i>     | "       | <i>V. amurensis</i>          |
| DVIT1158.1  | Davis      | <i>amurensis</i>     | "       | <i>V. amurensis</i>          |
| DVIT2006.1  | Davis      | <i>amurensis</i>     | KOR     | <i>V. amurensis</i>          |
| DVIT1156.2  | Davis      | <i>amurensis</i>     | CHN     | <i>V. amurensis</i>          |
| DVIT1157.2  | Davis      | <i>amurensis</i>     | "       | <i>V. amurensis</i>          |
| DVIT2005.5  | Davis      | <i>amurensis</i>     | "       | <i>V. amurensis</i>          |

|             |            |                     |         |                        |
|-------------|------------|---------------------|---------|------------------------|
| 597298.01   | Geneva, NY | B-166-016           | "       | <i>Vitis</i> species   |
| 588715.01   | Geneva, NY | B-166-019           | "       | <i>Vitis</i> species   |
| DVIT1432    | Davis      | Beaumont            | USA     | <i>V. riparia</i>      |
| DVIT2596.1  | Davis      | <i>betulifolia</i>  | CHN     | <i>V. betulifolia</i>  |
| 597296.01   | Geneva, NY | C-166-025           | "       | <i>V. romanetii</i>    |
| DVIT2550    | Davis      | C-166-026           | "       | <i>V. romanetii</i>    |
| 597297.01   | Geneva, NY | C-166-039           | "       | <i>V. romanetii</i>    |
| DVIT3192    | Davis      | C-166-043           | "       | <i>V. romanetii</i>    |
| DVIT1159.10 | Davis      | <i>coignetiae</i>   | Unknown | <i>V. coignetiae</i>   |
| DVIT1159.3  | Davis      | <i>coignetiae</i>   | Unknown | <i>V. coignetiae</i>   |
| DVIT1159.9  | Davis      | <i>coignetiae</i>   | Unknown | <i>V. coignetiae</i>   |
| DVIT2008.5  | Davis      | <i>ficifolia</i>    | KOR     | <i>V. ficifolia</i>    |
| DVIT2008.7  | Davis      | <i>ficifolia</i>    | "       | <i>V. ficifolia</i>    |
| DVIT1160.2  | Davis      | <i>ficifolia</i>    | CHN     | <i>V. ficifolia</i>    |
| DVIT1160.7  | Davis      | <i>ficifolia</i>    | "       | <i>V. ficifolia</i>    |
| DVIT1385    | Davis      | <i>flexuosa</i>     | Unknown | <i>V. flexuosa</i>     |
| 597295.01   | Geneva, NY | J-167-048           | CHN     | <i>Vitis</i> species   |
| DVIT2349.13 | Davis      | <i>jacquemontii</i> | PAK     | <i>V. jacquemontii</i> |
| DVIT2350.17 | Davis      | <i>jacquemontii</i> | "       | <i>V. jacquemontii</i> |

|               |        |                          |                                |               |                        |
|---------------|--------|--------------------------|--------------------------------|---------------|------------------------|
| DVIT2354.7    | Davis  | <i>jacquemontii</i>      |                                | "             | <i>V. jacquemontii</i> |
| DVIT2355.11   | Davis  | <i>jacquemontii</i>      |                                | "             | <i>V. jacquemontii</i> |
| DVIT2539      | Davis  | Kali Dakh II             |                                | "             | <i>V. jacquemontii</i> |
| DVIT1815      | Davis  | O35-59                   |                                | "             | <i>V. lanata</i>       |
| DVIT2027      | Davis  | <i>piasezkii</i>         |                                | Unknown, Asia | <i>V. piasezkii</i>    |
| DVIT2032      | Davis  | <i>piasezkii</i>         |                                | Unknown, Asia | <i>V. piasezkii</i>    |
| DVIT1772      | Davis  | Thomas                   |                                | USA           | <i>M. rotundifolia</i> |
| DVIT1756      | Davis  | Trayshed                 |                                | USA           | <i>M. rotundifolia</i> |
| DVIT3009      | Davis  | Aurore (S. 5279)         |                                | FRA           | Interspecific hybrids  |
| 0000-0-289-04 | Davis  | Baco blanc (Baco 22A)    |                                | FRA           | "                      |
| C 67-00       | Davis  | Chambourcin (JS 26.205)  |                                | FRA           | "                      |
| GVIT0342      | Davis  | Couderc 13               |                                | FRA           | "                      |
| DVIT0257      | Davis  | De Chaunac (Seibel 9549) |                                | FRA           | "                      |
| DVIT0196      | Davis  | Jaeger 70                |                                | USA           | "                      |
| 6039Mtp1      | Vassal | Joannès Seyve 23416      | Joannès Seyve 23416            | FRA           | "                      |
| DVIT0197      | Davis  | JS23-416                 |                                | FRA           | "                      |
| DVIT0214      | Davis  | Kuhlmann 188-2           | Kuhlmann 188-2 (Marechal Foch) | FRA           | "                      |
| DVIT2685      | Davis  | Sev Lernatu PRG 2224     |                                | RUS           | "                      |
| DVIT2685      | Davis  | Sev Lernatu PRG 2224     |                                | RUS           | "                      |

|            |       |                         |     |   |
|------------|-------|-------------------------|-----|---|
| HOP W11-13 | Davis | SV 12.375 Villard blanc | FRA | " |
| DVIT2741   | Davis | Vignoles                | FRA | " |

---
