# Supplementary material for: Identification of mildew resistance in wild and cultivated Central Asian grape germplasm
Source: PubMed Central journal article supplement (PMC3851849; doi:10.1186/1471-2229-13-149), 2013-10-04
Supplement: 1471-2229-13-149-S2.pdf [file 1471-2229-13-149-S2.pdf]

**Supplementary Table S2.** List of accessions that were potentially identical between the two collections based on fingerprint profiles from 10 SSR markers, but with different names. Accession IDs and names in blue font are maintained in the Vassal germplasm repository, and all others are maintained at Davis, California. Unique SSR profiles of accessions in bold are presented in Table S3. Three accessions highlighted in grey had similar fingerprint profiles to ‘Houssein blanc’ (0Mtp484) in the Vassal collection; the genotypic profile for this group is missing in Table S3.

| Accession ID             | Accession Name                      |
|--------------------------|-------------------------------------|
| <b>DVIT0634</b>          | <b>Alburla</b>                      |
| TYR VI 10-01             | Abla Aganin Isium                   |
| DVIT0327                 | Abla Aganin Isium                   |
| DVIT0332                 | Stambulari                          |
| <a href="#">1606Mtp1</a> | <a href="#">Albournlah</a>          |
| <b>TYR VI 10-03</b>      | <b>Afuz-Ali Urmasti</b>             |
| DVIT2703                 | Karabournov                         |
| TYR VI 16-13             | Rhazaki (Pg 1887)                   |
| DVIT0554                 | Rhazaki Arhanon                     |
| <a href="#">634Mtp6</a>  | <a href="#">Rhazaki</a>             |
| <b>TYR VI 10-05</b>      | <b>Agaday</b>                       |
| <a href="#">2189Mtp1</a> | <a href="#">Agadai</a>              |
| <b>DVIT0338</b>          | <b>Alulu</b>                        |
| <a href="#">1662Mtp3</a> | <a href="#">Rosa menna di vacca</a> |
| <b>2001-9-8093-01</b>    | <b>Asgari 01</b>                    |
| DVIT3157                 | Askari                              |
| DVIT0344                 | Askari Khari                        |
| DVIT0565                 | Askary                              |
| <a href="#">2087Mtp1</a> | <a href="#">Bidaneh Ghelmez</a>     |
| <b>DVIT0308</b>          | <b>Asma</b>                         |
| DVIT0309                 | Asma Sohvars                        |
| DVIT2054                 | Asma                                |
| <a href="#">0Mtp811</a>  | <a href="#">Noir de Crimée p.e.</a> |
| <b>DVIT2306</b>          | <b>Baharat Early</b>                |
| TYR VI 10-21             | Bharat Early                        |
| <a href="#">570Mtp11</a> | <a href="#">Orange muscat</a>       |

|                 |                        |
|-----------------|------------------------|
| <b>DVIT0310</b> | <b>Barmak Isium</b>    |
| 1736Mtp5        | Weisse Schirastraube   |
| <b>DVIT0311</b> | <b>Bias Kukuzeti</b>   |
| DVIT0317        | Kakourdess Weis        |
| 734Mtp1         | Mischung               |
| <b>DVIT0312</b> | <b>Blanc De Crimei</b> |
| 2249Mtp1        | Gordin                 |
| <b>DVIT0673</b> | <b>Buaki</b>           |
| 585Mtp58        | Chasselas 1            |
| <b>DVIT0613</b> | <b>Chan Isium</b>      |
| 0Mtp1473        | Khan isium             |
| <b>DVIT0371</b> | <b>Chaouch</b>         |
| DVIT1088        | Chaush White           |
| TYR VI 12-07    | Chiradzouli White      |
| 1673Mtp8        | Chaouch de Bulgarie    |
| <b>DVIT0685</b> | <b>Charas</b>          |
| 2460Mtp2        | Negru mare             |
| <b>DVIT0315</b> | <b>Dschan Im Isium</b> |
| 0Mtp819         | Nuju isium             |
| 0000-0-4432-S1  | Fetyaska S1            |
| 1661Mtp1        | Leanyka                |
| <b>DVIT0432</b> | <b>Khaldar</b>         |
| DVIT0409        | Ghula Dari             |
| 1738Mtp1        | Katta                  |
| <b>DVIT0417</b> | <b>Henab</b>           |
| DVIT2103        | Kastour Rumi           |
| 1677Mtp1        | Hénab                  |
| <b>DVIT0328</b> | <b>Himrisnky</b>       |
| DVIT2175        | Himrisnky              |
| 9Mtp7           | Graciano               |
| <b>DVIT0759</b> | <b>Hisakasy</b>        |
| 2512Mtp2        | Mardgeni               |

|                     |                                |
|---------------------|--------------------------------|
| <b>TYR VI 13-15</b> | <b>Huseine Rozvoj</b>          |
| 0Mtp484             | Houssein blanc                 |
| DVIT2075            | Khusaine Red                   |
| DVIT2074            | Kishmish Of Vir                |
| DVIT2077            | Klusaine Red                   |
| 0Mtp484             | Houssein blanc                 |
| <b>Turkmn 3026</b>  | <b>Irtyk Yaprak</b>            |
| 0Mtp865             | Pejnery blanc                  |
| <b>DVIT0196</b>     | <b>Jaeger 70</b>               |
| 5854Mtp3            | Maréchal Joffre                |
| <b>TYR VI 13-17</b> | <b>Jane De Smirna</b>          |
| 433Mtp1             | Darkaia de Jérusalem           |
| <b>DVIT0576</b>     | <b>Husseine</b>                |
| DVIT0429            | Kandahari                      |
| DVIT0539            | Tschilaci                      |
| 1746Mtp1            | Kandari noir                   |
| <b>DVIT2322</b>     | <b>Kara Dzhidzhigi</b>         |
| Turkmn 6255         | Kara Dzhidzhigi                |
| TYR VI 14-05        | Kara Dzhidzhigi                |
| 0Mtp1793            | Karadjidji                     |
| <b>Turkmn 551</b>   | <b>Kara Uzyum Ashhabadskii</b> |
| 2276Mtp1            | Kara ouzume d'Aschhabadsky     |
| <b>DVIT2323</b>     | <b>Karadzhandal</b>            |
| TYR VI 14-03        | Kara Djandjal                  |
| TYR VI 14-07        | Karazhumdal                    |
| 2277Mtp1            | Kara Djandjal                  |
| <b>Turkmn 29892</b> | <b>Keshmesh Heshrau</b>        |
| ARM Q01-20          | Keshmesh Zeravshan             |
| DVIT1103            | Kishmish Hishrau               |
| 2773Mtp1            | Kichmich chichraou             |
| <b>DVIT0430</b>     | <b>Halili belij</b>            |
| 657Mtp1             | Kalily                         |
| <b>TYR VI 17-19</b> | <b>Yarghouti</b>               |

|                          |                                |
|--------------------------|--------------------------------|
| DVIT2052                 | Yaghotti No. 2                 |
| DVIT2324                 | Kishmish Early                 |
| TYR VI 14-17             | Kishmish Early                 |
| Turkmn 6999              | Kishmish Krasnyi Turkmenskii   |
| <a href="#">1741Mtp1</a> | <a href="#">Naosé</a>          |
| <b>DVIT0435</b>          | <b>Kishmishi</b>               |
| DVIT0436                 | Kishmishi                      |
| <a href="#">1221Mtp2</a> | <a href="#">Itshkimar</a>      |
| <b>DVIT1070</b>          | <b>Kule Dary</b>               |
| Turkmn 549               | Terbash                        |
| <a href="#">2221Mtp1</a> | <a href="#">Terbach</a>        |
| <b>DVIT2641</b>          | <b>Leano</b>                   |
| <a href="#">0Mtp639</a>  | <a href="#">Lesnoy</a>         |
| <b>2001-9-8101-01</b>    | <b>Mehdi 01</b>                |
| <a href="#">2082Mtp1</a> | <a href="#">Mehdik</a>         |
| <b>DVIT0462</b>          | <b>Monukka</b>                 |
| <a href="#">1830Mtp1</a> | <a href="#">Black Monucca</a>  |
| <b>DVIT0319</b>          | <b>Mourvedre Famellestadt</b>  |
| <a href="#">64Mtp2</a>   | <a href="#">Mourvèdre</a>      |
| <b>TYR VI 15-13</b>      | <b>Mzivani</b>                 |
| <a href="#">1676Mtp2</a> | <a href="#">Mtzvané</a>        |
| <b>TYR VI 15-17</b>      | <b>Nimrang</b>                 |
| TYR VI 15-19             | Nimrang                        |
| <a href="#">0Mtp29</a>   | <a href="#">Angoor Kalan</a>   |
| <b>DVIT0330</b>          | <b>Noir D'automne</b>          |
| <a href="#">0Mtp809</a>  | <a href="#">Noir d'Automne</a> |
| <b>DVIT0321</b>          | <b>Precoce D'astrachan</b>     |
| <a href="#">0Mtp87</a>   | <a href="#">Bekalny</a>        |
| <b>DVIT0499</b>          | <b>Red Ohanez</b>              |
| DVIT3077                 | Sabalkanskoi                   |
| <a href="#">1731Mtp1</a> | <a href="#">Sabalkanskoï</a>   |
| <b>DVIT0608</b>          | <b>Rhazaki Anatolico</b>       |

|                     |                                |
|---------------------|--------------------------------|
| 1247Mtp1            | Baresan                        |
| <b>DVIT0555</b>     | <b>Rhazaki Mavro</b>           |
| 0Mtp1935            | Inconnu noir glabre (Archanes) |
| <b>HOP L04-19</b>   | <b>Rish Baba</b>               |
| 1227Mtp2            | Khoussaïne blanc               |
| <b>DVIT2168</b>     | <b>Shtur Angur</b>             |
| DVIT2653            | Sereksiya Rosavi               |
| 3007Mtp1            | Babeasca gris                  |
| <b>DVIT2174</b>     | <b>Taifi</b>                   |
| TYR VI 16-23        | Taifi                          |
| TYR VI 17-01        | Taifi Rosmovyi                 |
| 1192Mtp1            | Taïfi rose                     |
| <b>DVIT2928</b>     | <b>Tana-Kuzi</b>               |
| TYR VI 17-05        | Tana-Kuzi                      |
| 2661Mtp2            | Tana kouzy                     |
| <b>TYR VI 17-07</b> | <b>Tarnau</b>                  |
| 2841Mtp2            | Turnau                         |
| <b>TYR VI 17-11</b> | <b>Uzbekistan Muscat</b>       |
| 316Mtp1             | Verdelho de Madère             |
| <b>DVIT2664</b>     | <b>Zimsko Belo</b>             |
| TYR VI 17-21        | Zimsko Belo                    |
| 2709Mtp1            | Zimsko belo                    |
