# Supplementary material for: Identification of mildew resistance in wild and cultivated Central Asian grape germplasm
Source: PubMed Central journal article supplement (PMC3851849; doi:10.1186/1471-2229-13-149), 2013-10-04
Supplement: 1471-2229-13-149-S3.pdf [file 1471-2229-13-149-S3.pdf]

**Supplementary Table S3.** SSR marker allelic data for 403 unique accessions with 19 SSR markers. Missing data are indicated with a hyphen.

| Variety name and ID             | VV1p60  | VV1b01  | VVMD28  | VVMD32  | VVMD27  | VVMD21  | VVMD7   | VMC1b11 | VV1q52 | VV1v37  | VVS02   | VMC4f3.1 | VV1h54  | VVMD24  | VV1v67  | VVMD5   | VV1n73  | VV1n16  | VV1p31  |
|---------------------------------|---------|---------|---------|---------|---------|---------|---------|---------|--------|---------|---------|----------|---------|---------|---------|---------|---------|---------|---------|
| Zinfandel (Reference)           | 315-319 | 290-298 | 247-257 | 255-263 | 179-181 | 241-247 | 247-249 | 173-181 | 83-83  | 155-157 | 133-143 | 172-178  | 167-177 | 206-206 | 353-360 | 226-236 | 256-263 | 149-151 | 174-186 |
| Riesling (Reference)            | 303-321 | 288-298 | 227-233 | 251-271 | 181-189 | 247-247 | 249-257 | 165-183 | 77-83  | 157-157 | 143-151 | 172-188  | 149-163 | 206-214 | 353-360 | 226-234 | 263-263 | 149-151 | 174-182 |
| Chardonnay (Reference)          | 315-319 | 288-294 | 217-227 | 239-271 | 181-189 | 247-247 | 239-243 | 165-183 | 77-83  | 149-159 | 137-143 | 172-178  | 163-167 | 206-214 | 360-368 | 234-238 | 263-263 | 149-149 | 178-182 |
| Thompson Seedless (Reference)   | 315-317 | 290-298 | 217-243 | 249-249 | 181-194 | 247-254 | 239-253 | 165-183 | 79-83  | 155-177 | 145-151 | 188-190  | 163-165 | 206-215 | 353-353 | 234-234 | 261-263 | 151-155 | 178-182 |
| A Kalatchel (2076Mtp1)          | 319-319 | 290-306 | 243-257 | 249-251 | 181-194 | 241-247 | 247-249 | 165-165 | 83-83  | 149-149 | 125-151 | 188-188  | 165-167 | 206-218 | 353-363 | 234-234 | 256-263 | 149-155 | 184-188 |
| A'asemi S1 (1979-0-2219-S1)     | 315-319 | 290-290 | 247-257 | 249-255 | 194-194 | 247-247 | 239-251 | 165-181 | 77-79  | 149-171 | 145-151 | 164-188  | 159-177 | 206-206 | 357-366 | 232-240 | 263-263 | 147-149 | 184-188 |
| Ab Jusht (DVIT2040)             | 315-317 | 290-294 | 243-257 | 249-261 | 179-194 | 247-254 | 247-247 | 165-193 | 79-83  | 159-159 | 151-151 | 172-182  | 147-165 | 206-210 | 353-361 | 234-240 | 256-267 | 151-151 | 184-186 |
| Abjouch (1748Mtp1)              | 319-319 | 290-290 | 243-243 | 257-271 | 179-194 | 241-254 | 247-247 | 165-165 | 77-79  | 157-177 | 151-151 | 188-188  | 165-165 | 206-210 | 353-375 | 234-240 | 263-263 | 151-151 | 184-190 |
| Abla Aganin Isium (DVIT0305)    | 315-325 | 290-294 | 235-257 | 257-261 | 179-189 | 247-254 | 239-239 | 165-181 | 77-83  | 155-159 | 143-145 | 166-206  | 165-165 | 206-206 | 353-360 | 240-246 | 263-263 | 149-149 | 182-194 |
| Afuz-Ali Urmasti (TYR VI 10-03) | 315-315 | 290-294 | 233-257 | 257-271 | 185-185 | 254-254 | 239-249 | 183-183 | 77-79  | 147-159 | 133-135 | 166-188  | 165-177 | 206-206 | -:-     | 226-232 | 263-263 | 149-149 | 172-182 |
| Ag Kiourdach p.e. (2842Mtp1)    | 315-315 | 290-294 | 243-257 | 243-271 | 194-194 | 246-247 | 239-249 | 165-173 | -:-    | 149-149 | 145-145 | 166-174  | 159-165 | 206-210 | 353-357 | 234-236 | 256-265 | 149-151 | 172-194 |
| Agaday (TYR VI 10-05)           | 315-319 | 290-294 | 235-257 | 249-271 | 185-185 | 247-249 | 249-249 | 173-183 | 77-83  | 155-173 | 135-151 | 174-202  | 151-165 | 206-210 | 353-353 | 228-234 | 256-263 | 151-151 | 188-190 |
| Ahmeh Sal apyrène (2982Mtp1)    | 315-317 | 298-306 | 217-235 | 249-251 | 181-194 | 241-247 | 239-249 | 165-165 | 79-83  | 159-177 | 135-151 | 186-188  | 163-175 | 206-206 | 371-371 | 234-246 | 256-261 | 147-155 | 182-186 |

|                                 |         |         |         |         |         |         |         |         |       |         |         |         |         |         |         |         |         |         |         |
|---------------------------------|---------|---------|---------|---------|---------|---------|---------|---------|-------|---------|---------|---------|---------|---------|---------|---------|---------|---------|---------|
| Ajmi (DVIT0563)                 | 323-327 | 290-290 | 243-257 | 255-273 | 185-194 | 247-247 | 239-249 | 177-187 | 79-83 | 149-149 | 143-153 | 182-202 | 139-139 | 204-215 | 355-355 | 240-246 | 263-263 | --      | 172-186 |
| Ak ouzioum tapapskii (2897Mtp1) | 299-328 | 290-306 | 237-243 | 249-251 | 179-194 | 241-247 | 243-249 | 165-165 | 77-77 | 155-167 | 143-153 | 164-172 | 165-165 | 210-214 | 353-357 | 228-228 | 256-263 | 147-151 | 174-186 |
| Ak Schekerek (DVIT0612)         | 315-315 | 290-306 | 243-257 | 249-273 | 179-185 | 246-246 | 239-253 | 165-165 | 79-83 | 159-159 | 135-141 | 174-188 | 165-165 | 206-206 | 353-353 | 236-240 | 256-256 | 149-151 | 184-190 |
| Al Borla (DVIT0307)             | 317-319 | 294-294 | 247-257 | 249-261 | 183-187 | 246-254 | 239-239 | 165-171 | 79-81 | 155-173 | 143-145 | 168-206 | 151-167 | 206-206 | 353-377 | 228-238 | 263-267 | 149-151 | 176-188 |
| Alburla (DVIT0634)              | 319-321 | 294-294 | 251-257 | 251-251 | 179-194 | 241-247 | 249-249 | 177-183 | 77-79 | 155-159 | 145-145 | 174-188 | 165-167 | 206-224 | 351-371 | 240-240 | 256-263 | 151-151 | 174-182 |
| Ali Shaitan (Turkmn 19652)      | --      | 290-294 | 234-247 | 257-271 | 179-179 | 241-254 | 235-243 | 165-183 | 79-83 | 159-159 | 133-133 | 172-188 | 147-151 | 206-214 | 353-360 | 240-240 | 256-263 | 149-151 | 184-188 |
| Alia boka (2858Mtp1)            | 319-319 | 290-298 | 243-245 | 257-271 | 179-194 | 247-247 | 233-247 | 165-193 | 79-83 | 173-177 | 141-155 | 172-182 | 139-177 | 214-215 | 353-360 | 238-240 | 263-267 | 147-151 | 178-186 |
| Alloued Zeine (DVIT0337)        | 315-315 | 290-294 | 243-257 | 249-271 | 179-181 | 241-247 | 239-243 | 169-169 | 77-81 | 149-159 | 149-151 | 186-202 | 167-177 | 206-210 | 353-353 | 224-246 | 263-263 | 147-149 | 178-188 |
| Alü tierskü (1183Mtp1)          | --      | 290-294 | --      | 249-251 | 189-192 | --      | 239-245 | 165-183 | 77-79 | 157-159 | 135-147 | 166-178 | 163-165 | 208-210 | 353-371 | 232-240 | 263-265 | 151-151 | 178-180 |
| Alulu (DVIT0338)                | 323-323 | 290-294 | 235-257 | 251-271 | 181-185 | 241-254 | 239-247 | 183-187 | 79-79 | 159-167 | 139-143 | 166-172 | 165-177 | 206-210 | 357-357 | 232-246 | 263-263 | 147-149 | 178-182 |
| Anab-e-Shabi (0Mtp27)           | 315-319 | 290-294 | 257-257 | 255-271 | 179-185 | 256-264 | 239-243 | 169-173 | 83-83 | 149-149 | 155-155 | 178-178 | 139-139 | 206-206 | 360-366 | 236-238 | 263-263 | 151-151 | 184-184 |
| Anab-E-Shaki (TYR VI 10-09)     | 315-319 | --      | 257-257 | 255-271 | 179-185 | 256-264 | 239-243 | 169-173 | 83-83 | 149-149 | 151-151 | 178-178 | 139-139 | 206-206 | 360-366 | 236-236 | 263-263 | 151-151 | 184-184 |
| Aragatzi (2113Mtp1)             | 315-319 | 290-290 | 243-243 | 249-271 | 181-194 | 247-254 | 239-243 | 165-183 | 79-79 | 149-177 | 151-155 | 182-188 | 139-163 | 214-215 | 360-360 | 234-234 | 263-267 | 151-155 | 178-184 |
| Asgari 01 (2001-9-8093-01)      | 315-317 | 290-298 | 217-257 | 249-271 | 179-194 | 247-254 | 239-253 | 165-183 | 77-83 | 167-177 | 141-145 | 182-188 | 165-177 | 210-215 | 353-397 | 234-238 | 263-263 | 147-155 | 182-182 |
| Askari (DVIT0343)               | 315-315 | 290-294 | 233-243 | 271-271 | 185-185 | 247-254 | 249-249 | 165-183 | 79-81 | 159-167 | 133-135 | 166-172 | 165-177 | 206-210 | 353-387 | 226-238 | 263-263 | 149-149 | 172-178 |
| Askari noir (2088Mtp1)          | 305-319 | 294-306 | 235-247 | 251-261 | 179-185 | 241-247 | 239-247 | 165-169 | 77-77 | 159-161 | 135-141 | 166-178 | 151-165 | 214-215 | 353-371 | 226-246 | 256-263 | 149-149 | 184-194 |

|                                   |         |         |         |         |         |         |         |         |       |         |         |         |         |         |         |         |         |         |         |
|-----------------------------------|---------|---------|---------|---------|---------|---------|---------|---------|-------|---------|---------|---------|---------|---------|---------|---------|---------|---------|---------|
| Askudi (2083Mtp1)                 | 315-317 | 294-298 | 217-257 | 249-271 | 179-194 | 241-247 | 247-253 | 165-171 | 75-83 | 159-177 | 143-151 | 178-188 | 165-167 | 206-206 | 353-357 | 234-234 | 261-263 | 151-155 | 182-190 |
| Asma (DVIT0308)                   | 315-319 | 290-294 | 257-257 | 251-255 | 185-185 | 241-254 | 243-249 | 173-183 | 77-83 | 157-177 | 135-137 | 178-188 | 165-175 | 215-215 | 353-353 | 226-236 | 263-263 | 149-151 | 176-178 |
| Assylkara<br>(2505Mtp1)           | 315-317 | 290-298 | 243-274 | 251-255 | 192-194 | 247-247 | 239-245 | 165-183 | 79-83 | 157-177 | 135-145 | 178-186 | 165-167 | 210-214 | 371-373 | 228-232 | 256-263 | 147-151 | 172-180 |
| Aswad (DVIT2085)                  | 319-323 | 290-294 | 243-243 | 247-255 | 179-185 | 241-264 | 233-249 | 165-187 | 77-81 | 147-173 | 135-151 | 182-202 | 159-165 | 206-210 | 353-371 | 226-238 | 263-263 | 149-151 | 178-188 |
| B 15-19<br>(DVIT2171)             | --      | --      | 217-247 | 249-261 | 194-194 | --      | 233-253 | 165-183 | 83-83 | 157-177 | 137-145 | 185-188 | 163-165 | 206-206 | 357-357 | 234-234 | 263-263 | 147-155 | 180-184 |
| Baharat Early<br>(DVIT2306)       | 315-319 | 294-294 | 245-267 | 239-271 | 179-185 | 247-264 | 247-249 | 173-187 | 77-79 | 149-159 | 133-133 | 166-172 | 163-165 | 206-210 | 358-358 | 228-236 | 261-263 | 147-157 | 182-192 |
| Baïan chirei<br>(2271Mtp2)        | 315-319 | 290-294 | 235-243 | 271-271 | 193-194 | 241-247 | 243-247 | 165-171 | 75-79 | 149-155 | 143-143 | 174-186 | 163-165 | 206-206 | 353-368 | 228-238 | 263-263 | 151-155 | 178-188 |
| Baidh Ul Haman<br>(DVIT0358)      | 315-315 | 290-290 | 243-257 | 271-271 | 179-181 | 241-241 | 243-249 | 183-187 | 79-81 | 159-167 | 145-151 | 182-202 | 167-175 | 206-210 | 353-371 | 236-238 | 263-263 | 149-151 | 180-188 |
| Bargoon<br>(DVIT2499)             | 315-328 | 290-294 | 233-235 | 251-255 | 189-194 | 246-246 | 233-253 | 165-165 | 77-79 | 165-167 | 135-151 | 164-188 | 163-165 | 210-214 | 355-360 | 228-240 | 263-263 | 151-155 | 178-184 |
| Barmak Isium<br>(DVIT0310)        | 319-319 | 290-306 | 257-259 | 243-271 | 185-189 | 241-247 | 239-245 | 165-183 | 83-83 | 155-157 | 137-137 | 166-202 | 165-165 | 206-206 | 353-362 | 234-238 | 256-263 | 149-151 | 178-194 |
| Baxtiori (156Mtp1)                | 319-319 | 290-294 | 233-245 | 249-271 | 179-185 | 241-241 | 247-253 | 165-165 | 77-83 | 149-177 | 137-141 | 174-184 | 165-165 | 204-214 | 353-360 | 228-240 | 263-263 | 149-151 | 188-194 |
| Bayad (1749Mtp1)                  | 315-323 | 290-290 | 243-259 | 247-255 | 179-185 | 254-264 | 249-251 | 165-183 | 81-83 | 147-149 | 135-151 | 182-202 | 159-165 | 210-215 | 353-371 | 236-238 | 263-263 | 149-149 | 178-178 |
| Beli Potok<br>(DVIT1841)          | --      | --      | 235-253 | 239-255 | 189-189 | --      | 263-263 | 165-167 | 77-77 | 149-149 | 151-151 | 174-178 | 149-163 | 204-212 | 355-363 | 228-234 | 263-263 | 149-151 | 184-192 |
| Beruragoon<br>(DVIT2501)          | 319-328 | 290-290 | 235-277 | 271-271 | 187-189 | 254-254 | 247-249 | 181-193 | 77-77 | 149-176 | 125-147 | 164-182 | 151-165 | 206-210 | 355-355 | 228-238 | 263-263 | 149-151 | 166-190 |
| Bez el Anza<br>(S11981-0-2233-S1) | 315-328 | 290-306 | 233-253 | 257-271 | 185-194 | 254-264 | 239-253 | 181-183 | 79-83 | 151-159 | 133-141 | 174-188 | 167-177 | 206-206 | 353-353 | 232-232 | 263-263 | 149-151 | 172-184 |
| Bias Kukuzeti<br>(DVIT0311)       | 315-315 | 294-306 | 257-257 | 249-255 | 185-187 | 241-254 | 243-249 | 171-183 | 79-83 | 155-157 | 137-145 | 182-188 | 165-165 | 206-215 | 353-353 | 236-238 | 263-263 | 151-151 | 176-178 |

|                                            |         |         |         |         |         |         |         |         |       |         |         |         |         |         |         |         |         |         |         |
|--------------------------------------------|---------|---------|---------|---------|---------|---------|---------|---------|-------|---------|---------|---------|---------|---------|---------|---------|---------|---------|---------|
| Black Kishmish<br>(DVIT2055)               | 315-319 | 290-298 | 217-245 | 249-249 | 181-194 | 246-254 | 249-253 | 169-183 | 79-83 | 155-167 | 151-155 | 190-202 | 163-165 | 206-217 | 355-397 | 234-234 | 256-261 | 147-155 | 178-180 |
| Blanc d'Iran<br>(Charif)<br>(2086Mtp1)     | 315-319 | 290-298 | 235-257 | 271-271 | 179-181 | 247-247 | 239-247 | 165-173 | 77-79 | 159-167 | 141-151 | 182-182 | 165-177 | 210-214 | 343-353 | 238-246 | 263-263 | 147-151 | 182-184 |
| Blanc De Crimei<br>(DVIT0312)              | 319-325 | 294-294 | 227-235 | 263-271 | 179-181 | 254-256 | 239-239 | 173-183 | 79-83 | 165-167 | 133-135 | 166-206 | 165-165 | 206-206 | 353-360 | 226-246 | 263-263 | 149-149 | 176-194 |
| Bouaki nor<br>(2507Mtp1)                   | 315-319 | 290-294 | 234-257 | 249-259 | 185-194 | 241-247 | 243-243 | 165-183 | 79-83 | 155-155 | 141-155 | 172-202 | 177-177 | 206-210 | 353-360 | 234-236 | 256-267 | 151-155 | 184-188 |
| Boulany<br>(2509Mtp1)                      | 319-326 | 294-294 | 235-257 | 261-271 | 179-183 | 246-255 | 239-239 | --      | 77-83 | 159-167 | 143-145 | 166-166 | 151-165 | 206-206 | --      | 228-228 | 263-267 | 149-149 | 158-194 |
| Boyalsing I<br>(DVIT2496)                  | 289-319 | 290-306 | 235-245 | 251-261 | 185-189 | 247-254 | 243-251 | 165-165 | 83-83 | 159-159 | 133-135 | 182-190 | 141-163 | 204-206 | 347-353 | 228-228 | 263-265 | 151-151 | 166-190 |
| Boyalsing II<br>(DVIT2505)                 | 315-328 | 290-294 | 245-257 | 251-255 | 181-185 | 241-247 | 243-251 | 165-173 | 77-79 | 167-173 | 143-155 | 172-182 | 151-165 | 210-214 | 355-355 | 240-240 | 263-263 | 149-151 | 172-178 |
| Buaki (DVIT0673)                           | 315-319 | 290-294 | 217-267 | 239-239 | 185-189 | 247-264 | 239-247 | 171-173 | 79-83 | 149-159 | 133-143 | 172-178 | 163-167 | 206-210 | 358-358 | 228-236 | 263-263 | 157-157 | 180-192 |
| Budrilay<br>(DVIT2506)                     | 315-319 | 290-294 | 247-257 | 251-257 | 179-179 | 241-254 | 243-249 | 173-173 | 77-83 | 149-153 | 143-143 | 172-188 | 151-165 | 210-215 | 357-360 | 234-240 | 263-263 | 149-151 | 172-172 |
| Buraburi<br>(DVIT2512)                     | 289-328 | 290-294 | 243-247 | 257-273 | 179-179 | 247-247 | 243-251 | 165-183 | 83-83 | 153-167 | 143-147 | 164-190 | 139-139 | 206-206 | 353-353 | 228-234 | 256-263 | 149-151 | 172-172 |
| Caus X Pearl Csaba<br>(TYR VI 11-13)       | 315-319 | 290-290 | 217-257 | 239-251 | 179-185 | 247-254 | 247-247 | 173-181 | 79-83 | 149-149 | 135-143 | 172-182 | 163-165 | 204-206 | 353-358 | 228-238 | 256-263 | 151-157 | 164-182 |
| Chaani biely<br>(2675Mtp1)                 | 315-315 | 290-306 | 243-276 | 249-271 | 194-194 | 247-247 | 239-249 | 183-193 | 77-83 | --      | 143-145 | 178-188 | 151-165 | 206-214 | 353-371 | 234-236 | 261-263 | 149-151 | 178-194 |
| Chaani noir<br>(2676Mtp1)                  | 315-315 | 290-294 | 233-257 | 249-271 | 194-194 | 241-253 | 249-249 | 165-183 | 77-79 | 149-159 | 145-155 | 166-172 | 165-175 | 206-210 | 353-357 | 234-234 | 263-263 | 149-151 | 172-186 |
| Chakar angour de<br>Tachkent<br>(2677Mtp2) | 315-317 | 290-298 | 234-257 | 249-259 | 179-194 | 241-247 | 233-243 | 165-173 | 79-83 | 149-149 | 125-155 | 172-202 | 177-177 | 206-210 | 360-360 | 234-240 | 267-267 | 149-155 | 182-188 |
| Chamo<br>(DVIT2730)                        | 289-289 | 290-290 | 243-247 | 243-273 | 179-187 | --      | 249-251 | 165-181 | 77-83 | 167-167 | 143-153 | 186-190 | 165-165 | 206-210 | 355-360 | 234-236 | 263-263 | 149-151 | 172-172 |
| Chan Isium<br>(DVIT0613)                   | 319-319 | 290-306 | 235-243 | 249-255 | 179-185 | 247-247 | 249-253 | 171-185 | 79-83 | 159-167 | 135-141 | 178-188 | 139-147 | 206-210 | 347-353 | 234-236 | 256-256 | 149-151 | 182-186 |

|                                    |         |         |         |         |         |         |         |         |       |         |         |         |         |         |         |         |         |         |         |
|------------------------------------|---------|---------|---------|---------|---------|---------|---------|---------|-------|---------|---------|---------|---------|---------|---------|---------|---------|---------|---------|
| Chaouch<br>(DVIT0371)              | 319-319 | 290-294 | 257-257 | 251-271 | 179-183 | 254-254 | 247-249 | 165-181 | 79-83 | 149-171 | 135-151 | 182-188 | 159-165 | 204-215 | 353-353 | 228-238 | 256-263 | 149-151 | 182-186 |
| Charas (DVIT0685)                  | 315-319 | 290-290 | 243-243 | 257-257 | 179-185 | 246-254 | 245-249 | 165-183 | 77-83 | 173-177 | 125-135 | 172-182 | 165-165 | 206-206 | 353-360 | 226-228 | 256-256 | 149-151 | 184-190 |
| Charli Sar (TYR VI<br>12-05)       | 315-327 | --      | 243-243 | --      | 183-194 | --      | 249-253 | 165-183 | 79-83 | 173-177 | 137-151 | 182-188 | --      | --      | --      | 240-240 | 256-263 | 149-155 | 182-182 |
| Chassany<br>(0Mtp225)              | 319-330 | 294-298 | 239-257 | 271-271 | 183-194 | 241-247 | 239-247 | 171-173 | 75-83 | 155-163 | 137-141 | 174-174 | 151-163 | 206-215 | 353-353 | 226-236 | 256-263 | 149-151 | 178-190 |
| Chirai obak<br>(1186Mtp1)          | 315-317 | 294-294 | 235-243 | 249-255 | 181-194 | 241-246 | 243-243 | 165-169 | 79-83 | 145-177 | 137-143 | 172-182 | 151-165 | 206-206 | 353-366 | 236-240 | 256-263 | 151-151 | 158-188 |
| Chirvan chakki<br>(2678Mtp2)       | 315-315 | 294-294 | 243-247 | 249-271 | 192-194 | 241-253 | 245-249 | 165-165 | 77-79 | 149-159 | 143-145 | 166-172 | 163-165 | 204-208 | 353-353 | 232-234 | 263-263 | 149-151 | 178-194 |
| Chol Uzyum<br>(Turkmn 16392)       | 315-319 | 290-294 | 233-243 | 257-271 | 194-194 | 241-256 | 249-263 | 165-183 | 79-83 | 149-149 | 143-143 | 186-192 | 167-175 | 206-210 | 353-357 | 228-236 | 263-263 | 151-151 | 186-194 |
| Chtour angour<br>(2857Mtp1)        | 319-327 | 290-290 | 243-247 | 255-257 | 185-194 | 241-247 | 243-253 | 165-165 | 79-83 | 149-149 | 135-151 | 182-190 | 139-165 | 206-215 | 357-375 | 234-236 | 256-263 | 151-151 | 174-186 |
| Churgoon<br>(DVIT2532)             | 289-315 | 294-306 | 235-235 | 243-251 | 185-185 | 246-246 | 243-251 | 165-165 | 77-79 | 149-149 | 125-151 | 188-202 | 139-139 | 206-206 | 360-360 | 238-240 | 263-265 | 149-149 | 188-194 |
| Cirmisi Sap De<br>Sudak (DVIT0313) | 315-319 | 290-294 | 243-257 | 255-271 | 185-185 | 241-254 | 249-249 | 171-173 | 83-83 | 155-177 | 137-145 | 174-188 | 165-175 | 206-215 | 353-353 | 236-236 | 263-263 | 146-151 | 178-178 |
| Coudsi<br>(DVIT0384)               | 315-315 | 290-294 | 247-257 | 261-271 | 179-185 | 241-254 | 247-247 | 169-187 | 79-81 | 149-157 | 143-151 | 186-202 | 165-175 | 204-206 | 347-353 | 236-236 | 263-263 | 151-151 | 178-182 |
| Dabouki<br>(DVIT0388)              | 323-323 | 290-290 | 257-257 | 249-271 | 179-183 | 241-254 | 247-249 | 165-187 | 79-81 | 157-157 | 135-151 | 202-202 | 165-175 | 206-220 | 353-353 | 234-236 | 263-263 | 149-151 | 178-182 |
| Dabouki<br>(DVIT1982)              | 315-323 | 290-290 | 257-257 | 249-271 | 179-185 | 247-264 | 247-249 | 165-187 | 79-81 | 149-157 | 143-151 | 202-202 | 165-175 | 206-220 | 353-353 | 228-236 | 263-263 | 149-151 | 182-190 |
| Dais-el-anz<br>(DVIT0569)          | 315-319 | 290-298 | 237-257 | 249-271 | 179-194 | 247-254 | 249-249 | 165-169 | 79-79 | 149-167 | 151-155 | 182-182 | 167-177 | 206-206 | 353-357 | 234-236 | 263-263 | 151-151 | 178-178 |
| Dalnato I<br>(DVIT2509)            | 328-328 | 290-290 | 245-257 | 251-271 | 179-185 | 241-247 | 247-255 | 165-165 | 75-77 | 149-167 | 135-155 | 182-190 | 163-165 | 214-214 | 353-353 | 236-240 | 263-263 | 149-151 | 172-190 |
| Dardari<br>(DVIT2536)              | 289-315 | 290-294 | 245-247 | 251-261 | 179-189 | 246-254 | 233-243 | 165-165 | 77-77 | 159-159 | 133-135 | 182-188 | 139-139 | 204-206 | 353-360 | 228-240 | 256-263 | 149-151 | 190-190 |
| De Hengril<br>(857Mtp1)            | 315-328 | 294-294 | 233-235 | 249-271 | 181-189 | 241-247 | 243-249 | 165-183 | 79-83 | 149-163 | 135-145 | 186-186 | 163-165 | 206-215 | 353-357 | 234-240 | 263-265 | 151-151 | 178-188 |

|                                  |         |         |         |         |         |         |         |         |       |         |         |         |         |         |         |         |         |         |         |
|----------------------------------|---------|---------|---------|---------|---------|---------|---------|---------|-------|---------|---------|---------|---------|---------|---------|---------|---------|---------|---------|
| Demir Kara<br>(DVIT0314)         | 315-323 | 290-294 | 257-257 | 249-271 | 179-187 | 246-254 | 239-253 | 181-183 | 77-77 | 157-167 | 135-145 | 166-166 | 165-165 | 206-206 | 353-371 | 232-240 | 256-267 | 149-149 | 176-184 |
| DK #01 (Turkmn<br>13358)         | 315-328 | 290-298 | 217-277 | 239-251 | 181-187 | 246-246 | 249-249 | 173-183 | 77-79 | 155-155 | 125-139 | 182-188 | 151-167 | 204-214 | 353-357 | 232-248 | 256-256 | 151-151 | 188-190 |
| DK #02 (Turkmn<br>13359)         | 315-328 | 288-306 | 233-247 | 251-251 | 179-179 | 247-247 | 235-243 | 173-183 | 79-83 | 155-155 | 133-139 | 164-182 | 139-165 | 210-215 | 353-360 | 226-228 | 256-263 | 151-151 | 192-194 |
| DK #03 (Turkmn<br>13360)         | 315-328 | 290-298 | 257-257 | 247-249 | 179-179 | 241-254 | 235-251 | 165-169 | 79-79 | 153-177 | 139-153 | 182-188 | 139-147 | 206-210 | 353-353 | 234-240 | 256-263 | 149-149 | 188-190 |
| DK #04 (Turkmn<br>13361)         | 319-319 | 294-298 | 277-277 | 255-257 | 187-187 | 247-247 | 235-249 | 165-169 | 79-83 | 167-167 | 137-139 | 186-188 | 139-165 | 204-210 | 353-353 | 234-236 | 256-263 | 151-151 | 174-194 |
| DK #05 (Turkmn<br>13362)         | 319-319 | 298-298 | 247-277 | 257-271 | 187-187 | --      | 235-249 | 169-183 | 77-79 | 167-173 | 137-143 | 186-188 | 139-151 | 210-215 | 353-360 | 234-240 | 256-263 | 151-151 | 174-190 |
| DK #07 (Turkmn<br>13364)         | 315-328 | 294-294 | 243-257 | 251-261 | 179-194 | 254-254 | 235-253 | 165-193 | 83-83 | 149-177 | 135-151 | 182-182 | 147-159 | 206-214 | 353-353 | 234-240 | 256-256 | 151-151 | 186-194 |
| DK #08 (Turkmn<br>13365)         | 319-319 | 290-294 | 233-257 | 251-271 | 185-194 | 241-247 | 251-263 | 165-173 | 77-79 | 145-145 | 135-135 | 178-188 | 139-151 | 204-204 | 358-358 | 234-238 | 256-267 | 151-151 | 174-190 |
| DK #10 (Turkmn<br>13388)         | 315-315 | --      | 233-247 | 249-271 | 179-187 | --      | 235-253 | 165-173 | 79-83 | 149-177 | 125-153 | 164-188 | 147-147 | --      | 353-353 | 234-234 | 256-263 | 149-151 | 184-190 |
| DK #11 (Turkmn<br>13387)         | 299-301 | 290-294 | 235-243 | 249-255 | 179-187 | 241-247 | 235-249 | 173-173 | 83-83 | 149-155 | --      | 182-188 | 147-165 | 214-214 | 353-353 | 226-234 | 256-263 | 151-151 | 184-188 |
| DK #12 (Turkmn<br>13386)         | 319-319 | 272-290 | 233-233 | 249-257 | 179-194 | 241-247 | 235-253 | 165-165 | 77-79 | 145-167 | 125-137 | 172-190 | 139-165 | 206-215 | 357-360 | 228-236 | 256-263 | 149-151 | 174-188 |
| DK #17 (Turkmn<br>13381)         | 328-328 | 290-312 | 271-277 | 239-251 | 185-187 | 247-247 | 247-249 | 165-183 | 77-79 | 155-173 | 133-139 | 178-188 | 139-167 | 206-214 | 336-357 | 232-234 | 256-263 | 151-151 | 184-190 |
| DK #2 (Turkmn<br>13389)          | 317-317 | 290-294 | 243-247 | 249-271 | 179-187 | 247-247 | 235-237 | 173-193 | 79-83 | 149-177 | 133-133 | 188-188 | 147-147 | 210-214 | 353-353 | 232-234 | 263-267 | 151-151 | 182-188 |
| DK #21 Chernyi<br>(Turkmn 13379) | 328-328 | 290-312 | 271-277 | 239-251 | 179-194 | 247-247 | 247-249 | 165-183 | 77-79 | 155-173 | 133-133 | 178-188 | 139-167 | 206-214 | 336-357 | 232-234 | 256-263 | 151-151 | 184-190 |
| DK #39 (Turkmn<br>13377)         | 319-319 | 294-294 | 233-243 | 247-257 | 179-189 | 247-247 | 235-251 | 165-183 | 79-79 | 155-173 | 133-135 | 164-164 | 147-151 | 206-214 | 353-360 | 226-226 | 256-256 | 151-151 | 178-182 |
| DK #9 (Turkmn<br>6272)           | 319-319 | 290-294 | 235-235 | 247-251 | 185-187 | 241-247 | 235-249 | --      | 83-83 | --      | 133-135 | 178-188 | 147-165 | 206-215 | 353-360 | 226-234 | --      | 151-151 | 178-186 |
| DK Belyi (Turkmn<br>6977)        | 299-301 | 290-294 | 235-243 | 249-255 | 179-187 | 241-247 | 235-253 | 173-173 | 83-83 | 149-155 | 133-133 | 164-188 | 147-165 | 215-215 | 353-353 | 234-234 | 256-263 | 151-151 | 184-188 |

|                                         |         |         |         |         |         |         |         |         |       |         |         |         |         |         |         |         |         |         |         |
|-----------------------------------------|---------|---------|---------|---------|---------|---------|---------|---------|-------|---------|---------|---------|---------|---------|---------|---------|---------|---------|---------|
| DK Melkii Chernyi<br>(Turkmn 13375)     | 303-311 | 290-290 | 233-235 | 239-239 | 175-189 | 247-256 | 239-239 | 183-183 | 77-83 | 159-159 | 133-151 | 172-178 | 165-179 | 206-215 | 360-369 | 232-240 | 263-267 | 151-151 | 186-188 |
| DK Melkii Krasnyi<br>(Turkmn 13374)     | 315-315 | 288-294 | 243-245 | 247-249 | 179-181 | 241-247 | 247-247 | 183-183 | 77-77 | 153-159 | 133-133 | 182-188 | 139-165 | 206-214 | --      | 236-246 | --      | 149-151 | 182-190 |
| DK N15 (#15)<br>(Turkmn 30743)          | 315-328 | 288-294 | 243-245 | 243-257 | 179-185 | 241-247 | 235-243 | 169-169 | 77-79 | 153-155 | --      | 182-202 | 159-159 | 206-206 | 353-360 | 234-240 | 256-256 | 151-151 | 170-186 |
| Doppelaugen<br>(OMtp318)                | 315-319 | 290-294 | 234-257 | 261-271 | 181-185 | 241-246 | 245-249 | 171-183 | 79-83 | 155-159 | 135-143 | 166-174 | 151-169 | 206-215 | 353-353 | 236-236 | 256-265 | 149-151 | 178-190 |
| Dschan Im Isium<br>(DVIT0315)           | 315-319 | 290-294 | 243-257 | 249-271 | 179-185 | 246-254 | 239-249 | 171-173 | 79-83 | 159-177 | 145-145 | 168-188 | 175-177 | 206-215 | 353-353 | 228-236 | 263-267 | 149-151 | 178-188 |
| Ekdona<br>Turkmenskaya<br>(Turkmn 6218) | 315-317 | 290-298 | 234-257 | 249-259 | 179-194 | 241-247 | 233-243 | 165-173 | 79-83 | 149-149 | 125-133 | 172-202 | 175-177 | 206-210 | 360-360 | 234-240 | 267-267 | 149-155 | 180-188 |
| Fachren Weis<br>(DVIT0316)              | 317-317 | 294-298 | 235-243 | 249-271 | 189-194 | 241-254 | 239-239 | 165-171 | 83-83 | 149-177 | 133-145 | 174-188 | 155-165 | 206-215 | 353-353 | 234-240 | 263-263 | 149-151 | 178-182 |
| Fahri (DVIT0402)                        | 315-319 | 290-290 | 234-259 | 255-271 | 185-194 | 241-247 | 253-253 | 165-165 | 79-79 | 155-177 | 141-151 | 182-182 | 165-175 | 210-215 | 353-375 | 234-240 | 263-263 | 147-155 | 184-190 |
| Fatai (DVIT2510)                        | 289-289 | 290-306 | 235-235 | 261-271 | 179-189 | 254-254 | 239-249 | 165-181 | 83-83 | 153-173 | 141-145 | 182-188 | 139-165 | 204-206 | 347-358 | 228-234 | 256-263 | --      | 172-194 |
| Fayoumi<br>(DVIT2636)                   | 328-328 | 290-306 | 251-255 | --      | 185-194 | 247-264 | 249-253 | 181-181 | 81-83 | 151-155 | 141-143 | 174-186 | --      | 206-215 | --      | 232-232 | 263-263 | 151-151 | 172-184 |
| Fetyaska (S10000-<br>0-4432-S1)         | 327-327 | 290-294 | 247-259 | 247-251 | 185-194 | 247-247 | 247-253 | 171-183 | 77-83 | 155-159 | 133-133 | 172-202 | 139-167 | 206-206 | 353-357 | 226-236 | 256-265 | 149-149 | 174-194 |
| Gaschochi<br>(DVIT2537)                 | 289-317 | 290-306 | 235-245 | 243-261 | 181-189 | 247-254 | 239-243 | 165-165 | 83-83 | 159-173 | 135-145 | 182-190 | 139-141 | 204-214 | 347-361 | 228-246 | 256-265 | 151-151 | 188-192 |
| Gechi Kyrilen<br>(Turkmn 3028)          | 315-319 | 290-294 | 235-247 | 271-271 | 179-179 | 247-247 | 253-253 | 187-193 | 79-83 | 159-177 | 135-153 | 186-188 | 165-165 | 210-210 | 353-353 | 234-234 | 256-256 | 149-151 | 186-186 |
| Golodan (OMtp428)                       | 319-319 | 290-294 | 217-243 | 249-249 | 179-194 | 247-254 | 239-253 | 165-173 | 79-79 | 149-159 | 137-145 | 172-188 | 139-165 | 206-215 | 353-360 | 234-240 | 261-263 | 151-151 | 178-184 |
| Gora Chirine faux<br>(OMtp429)          | 315-317 | 298-298 | 217-243 | 249-249 | 181-194 | 247-247 | 239-239 | 183-183 | 79-83 | 155-177 | 145-151 | 188-188 | 163-165 | 206-215 | 353-353 | 234-234 | 263-263 | 151-155 | 178-182 |
| Gros Colman<br>(DVIT0413)               | 315-323 | 294-294 | 227-243 | 251-271 | 179-185 | 247-247 | 247-255 | 173-183 | 77-79 | 155-159 | 133-135 | 166-166 | 163-165 | 206-206 | 353-353 | 226-236 | 256-256 | 149-149 | 186-188 |

|                                  |         |         |         |         |         |         |         |         |       |         |         |         |         |         |         |         |         |         |         |
|----------------------------------|---------|---------|---------|---------|---------|---------|---------|---------|-------|---------|---------|---------|---------|---------|---------|---------|---------|---------|---------|
| Gungargoon (DVIT2500)            | 319-328 | 290-294 | 243-259 | 257-271 | 194-194 | 247-247 | 247-253 | 165-173 | 77-79 | 155-155 | 135-141 | 182-182 | 139-165 | --      | 353-357 | 236-240 | 263-263 | 149-155 | 178-186 |
| Gurgon (Turkmn 3033)             | 315-328 | 290-294 | 217-257 | 249-249 | 179-187 | 246-254 | 235-253 | 165-165 | 77-83 | 173-177 | 133-135 | 164-188 | 147-175 | 210-215 | 347-353 | 234-240 | 256-263 | 151-151 | 186-190 |
| Guzal Kara (TYR VI 13-09)        | 319-323 | 294-298 | 227-233 | 251-271 | 185-194 | 249-249 | 243-247 | 183-193 | 79-79 | 153-155 | 135-151 | 166-172 | 163-177 | 206-210 | 353-375 | 226-240 | 256-263 | 149-155 | 178-186 |
| Haita safid (0Mtp471)            | 315-315 | 290-294 | 243-243 | 249-251 | 179-185 | 247-254 | 249-249 | 165-173 | 77-83 | 155-177 | 133-135 | 180-188 | 165-165 | 210-215 | 368-368 | 234-234 | 256-263 | 155-155 | 182-186 |
| Halili belij (DVIT0430)          | 315-317 | 290-294 | 243-257 | 249-261 | 179-185 | 247-254 | 235-249 | 165-193 | 79-83 | 159-159 | 125-135 | 172-182 | 147-165 | 206-210 | 353-361 | 234-240 | 256-267 | 149-151 | 186-186 |
| Halili Nobat Niyaz (Turkmn 6971) | 299-315 | 294-294 | 233-257 | 257-261 | 179-185 | 247-247 | 235-249 | 193-193 | 83-83 | 145-145 | 133-141 | 182-182 | 165-165 | 206-218 | 353-353 | 236-240 | 256-263 | 149-151 | 182-186 |
| Hassaine (DVIT0416)              | 319-319 | 290-290 | 234-259 | 249-255 | 194-194 | 241-247 | 243-253 | 173-183 | 79-79 | --      | 147-151 | 182-188 | 165-177 | 210-215 | 353-353 | 224-228 | 256-263 | 151-155 | 184-184 |
| Henab (DVIT0417)                 | 315-323 | 290-306 | 243-257 | 255-273 | 181-194 | 241-247 | 243-253 | 183-183 | 77-83 | 157-167 | 143-149 | 164-202 | 139-177 | 215-215 | 353-353 | 226-232 | 263-263 | 151-151 | 188-188 |
| Himrisnky (DVIT0328)             | 307-315 | 290-290 | 243-257 | 239-255 | 179-183 | 247-252 | 239-239 | 171-183 | 83-83 | 161-173 | 139-151 | 178-206 | 165-166 | 206-206 | 353-360 | 226-238 | 263-263 | 149-157 | 178-190 |
| Hisakasy (DVIT0759)              | 315-319 | 294-294 | 233-257 | 251-271 | 194-194 | 247-247 | 245-249 | 171-183 | 83-83 | 167-177 | 135-143 | 178-202 | 151-165 | 206-210 | 353-353 | 234-236 | 263-263 | 149-151 | 176-178 |
| Hiv Uzyum (Turkmn 19806)         | 319-321 | 290-298 | 233-243 | 249-257 | 194-194 | 241-254 | 243-247 | 165-183 | 79-79 | 167-167 | 133-135 | 182-182 | 153-165 | 206-214 | --      | 226-234 | 263-263 | 151-155 | 186-194 |
| Hosargoon (DVIT2503)             | 317-317 | 290-306 | 243-247 | 255-255 | 185-185 | 246-246 | 249-251 | 165-169 | 77-79 | 149-153 | 133-135 | 164-202 | 165-165 | 206-210 | 355-355 | 226-232 | 263-263 | 149-151 | 172-178 |
| Hunisa (635Mtp1)                 | 315-315 | 290-290 | 243-243 | 249-273 | 181-194 | 247-264 | 239-253 | 183-187 | 77-83 | 151-157 | 143-149 | 164-202 | 139-159 | 206-215 | 353-355 | 228-232 | 263-263 | 149-151 | 172-188 |
| Huseine Rozvoj (TYR VI 13-15)    | 315-319 | 290-290 | 243-243 | 249-257 | 185-194 | 246-246 | 243-249 | 165-173 | 77-79 | 149-173 | 135-155 | 182-202 | 165-177 | 206-210 | 353-353 | 228-234 | 256-263 | 149-155 | 182-184 |
| Husseine (DVIT0576)              | 313-315 | 290-298 | 243-245 | 257-271 | 179-194 | 241-249 | 233-243 | 165-193 | 77-79 | 173-177 | 141-155 | 172-172 | 139-139 | 215-215 | 353-353 | 234-240 | 263-263 | 149-149 | 178-186 |
| Irki (1752Mtp1)                  | 315-323 | 290-306 | 243-243 | 255-271 | 179-185 | 254-264 | 239-249 | 183-187 | 77-83 | 147-147 | 143-151 | 182-182 | 165-165 | 206-210 | 353-371 | 238-246 | 261-263 | 149-151 | 176-178 |
| Irtyk Yaprak (Turkmn 3026)       | 315-319 | 290-294 | 247-257 | --      | 179-185 | 241-247 | 235-251 | 183-193 | 79-83 | 159-159 | 135-135 | 188-188 | 129-139 | 204-210 | --      | 234-240 | 256-263 | 151-151 | 182-184 |

|                                      |         |         |         |         |         |         |         |         |       |         |         |         |         |         |         |         |         |         |         |
|--------------------------------------|---------|---------|---------|---------|---------|---------|---------|---------|-------|---------|---------|---------|---------|---------|---------|---------|---------|---------|---------|
| Itchkimar biely faux (2845Mtp1)      | 319-327 | 290-290 | 233-243 | 255-271 | 179-185 | 241-248 | 249-253 | 165-183 | 77-83 | 155-155 | 143-151 | 188-200 | 165-165 | 206-206 | 347-371 | 234-240 | 256-256 | 151-151 | 176-186 |
| Jane De Smirna (TYR VI 13-17)        | 315-319 | 288-290 | 235-276 | 261-263 | 183-194 | 247-247 | 239-247 | 171-183 | 77-83 | 149-167 | 139-143 | 172-188 | 165-177 | 206-206 | 361-371 | 228-228 | 263-263 | 149-149 | 176-194 |
| Kabuli (DVIT2497)                    | 315-317 | 290-294 | 235-245 | 257-271 | 185-187 | 246-254 | 239-249 | 165-169 | 83-83 | 149-159 | 135-145 | 172-182 | 139-141 | 210-214 | 353-361 | 228-234 | 263-265 | 151-151 | 170-190 |
| Kala Kostan (DVIT2534)               | 315-319 | 290-294 | 243-247 | --      | 177-194 | 247-254 | 253-253 | 169-183 | 83-83 | 147-155 | 129-145 | 190-206 | 151-163 | 207-215 | --      | 234-238 | 254-263 | 155-155 | 180-180 |
| Kalamak (DVIT0335)                   | 319-328 | 290-304 | 243-280 | 249-271 | 179-194 | 247-247 | 247-253 | 165-183 | 79-83 | 149-167 | 137-141 | 182-182 | 165-165 | 206-214 | 360-375 | 232-234 | 256-263 | 151-155 | 184-186 |
| Kali Sag (DVIT2917)                  | 315-319 | 290-290 | 217-234 | 237-253 | 181-194 | 247-254 | 247-253 | 165-173 | 77-79 | 149-177 | 141-153 | 182-188 | 165-177 | 210-215 | --      | 234-240 | 263-263 | 147-155 | 180-186 |
| Kandahar (DVIT0428)                  | 317-317 | 290-290 | 217-233 | 249-255 | 194-194 | 249-254 | 239-253 | 165-165 | 79-83 | 153-177 | 151-155 | 172-188 | 165-175 | 215-218 | 353-353 | 234-240 | 263-263 | 149-151 | 182-190 |
| Kandhari (DVIT2081)                  | 319-319 | 290-298 | 243-257 | 249-255 | 189-194 | 254-254 | 243-247 | 165-165 | 77-77 | 177-177 | 143-151 | 188-190 | 163-165 | 210-218 | 360-360 | 234-236 | 263-263 | 151-155 | 162-190 |
| Kanfet isium (0Mtp565)               | 319-319 | 294-294 | 239-257 | 249-271 | 193-194 | 241-249 | 245-259 | 173-183 | 83-83 | 165-167 | 143-143 | 178-202 | 151-165 | 206-210 | 368-368 | 234-234 | 256-263 | 149-151 | 178-190 |
| Kara Dzhidzhigi (DVIT2322)           | 319-319 | 290-298 | 234-245 | 249-255 | 181-185 | 241-254 | 249-253 | 165-169 | 83-83 | 155-155 | 141-155 | 182-202 | 165-165 | 206-214 | 360-360 | 234-236 | 256-256 | 149-155 | 178-186 |
| Kara Lakana (DVIT0773)               | 315-319 | 294-294 | 247-257 | 243-261 | --      | 247-256 | 239-249 | 165-183 | 79-83 | 159-167 | 145-145 | 166-178 | 163-177 | 206-206 | 353-357 | 226-240 | 263-263 | 149-151 | 180-204 |
| Kara Palvan (2780Mtp1)               | 319-327 | 290-290 | 243-243 | 257-257 | 179-194 | 241-254 | 249-253 | 165-183 | 77-79 | 155-177 | 125-151 | 172-182 | 139-165 | 206-206 | 353-357 | 234-240 | 263-263 | 151-155 | 172-172 |
| Kara Terbash (Turkmn 6982)           | 315-319 | 290-290 | 243-257 | 261-271 | 179-185 | 241-254 | 235-253 | 165-173 | 77-79 | 159-159 | 125-151 | 182-182 | 147-165 | 206-214 | 353-361 | 234-236 | 256-256 | 149-151 | 186-186 |
| Kara Uzyum Ashhabadskii (Turkmn 551) | 319-319 | 290-306 | 247-247 | 271-271 | 179-185 | 241-247 | 247-253 | 165-193 | 77-83 | 155-159 | 135-141 | 174-188 | 165-165 | 206-206 | 353-358 | 236-240 | 256-263 | 151-151 | 186-190 |
| Kara Uzyum Nuhurskii (Turkmn 3036)   | 319-328 | 290-294 | 257-271 | 251-271 | 179-187 | 247-254 | 235-253 | 173-193 | 79-83 | 149-159 | 135-151 | 182-188 | 139-147 | 210-214 | 336-353 | 234-236 | 256-256 | 149-151 | 186-188 |
| Karadzhandal (DVIT2323)              | 315-319 | 290-294 | 233-257 | 249-271 | 179-194 | 247-247 | 243-249 | 165-169 | 77-79 | 177-177 | 125-155 | 182-202 | 139-139 | 210-214 | 353-360 | 234-240 | 263-267 | 155-155 | 182-186 |

|                                 |         |         |         |         |         |         |         |         |       |         |         |         |         |         |         |         |         |         |         |
|---------------------------------|---------|---------|---------|---------|---------|---------|---------|---------|-------|---------|---------|---------|---------|---------|---------|---------|---------|---------|---------|
| Karga Dili (Turkmn 21551)       | 315-319 | 294-306 | 243-247 | 255-271 | 185-185 | 246-246 | 239-247 | 165-171 | 77-83 | 155-159 | 139-141 | 172-178 | 165-165 | 206-206 | 353-358 | 226-236 | 256-263 | 151-151 | 178-190 |
| Kash Uzyum (Turkmn 6981)        | 315-319 | 290-306 | 235-235 | 249-251 | 185-194 | 241-241 | 251-253 | 165-183 | 77-83 | 155-155 | 141-143 | 178-202 | 165-175 | 204-206 | 353-360 | 236-240 | 263-263 | 147-151 | 186-190 |
| Kashiri (DVIT2451)              | 289-328 | 290-306 | 235-235 | 243-271 | 181-185 | 247-247 | 239-249 | 165-165 | 83-83 | 159-159 | 135-145 | 164-182 | 139-141 | 204-206 | 355-361 | 228-228 | 263-265 | 151-151 | 172-194 |
| Katta Kurgan (DVIT0774)         | 315-319 | 290-298 | 234-234 | 255-271 | 179-194 | 247-249 | 243-253 | 165-193 | 77-79 | 153-177 | 151-155 | 172-182 | 175-177 | 210-218 | 353-353 | 240-240 | 263-263 | 149-155 | 178-190 |
| Kaytagi (2951Mtp1)              | 315-319 | 290-294 | 257-259 | 247-271 | 181-194 | 247-249 | 245-259 | 165-171 | 83-83 | 167-177 | 135-135 | 178-186 | 165-165 | 206-210 | 353-371 | 234-234 | 263-263 | 151-151 | 176-188 |
| Kechmisch aly violet (1679Mtp2) | 315-319 | 290-294 | 243-247 | 251-271 | 185-194 | 247-264 | 243-249 | 167-187 | 77-83 | 157-163 | 135-149 | 168-202 | 165-165 | 206-208 | 357-360 | 226-246 | 263-263 | 147-149 | 182-184 |
| Keshmesh Heshrau (Turkmn 29892) | 315-319 | 290-298 | 217-243 | --      | 181-194 | 247-254 | 243-249 | 169-183 | 79-83 | 155-155 | 151-151 | 188-202 | --      | 206-206 | --      | 228-234 | 256-256 | 147-151 | 182-184 |
| Khalchili (DVIT0431)            | 315-319 | 298-298 | 243-245 | 249-271 | 181-194 | 247-247 | 243-253 | 165-183 | 77-79 | 155-173 | 143-145 | 172-186 | 165-177 | 206-218 | 353-360 | 238-240 | 263-267 | 149-155 | 190-194 |
| Khaldar (DVIT0432)              | 317-319 | 290-290 | 243-257 | 257-271 | 179-179 | 254-254 | 247-249 | 165-183 | 77-77 | 157-159 | 135-151 | 182-188 | 165-175 | 210-210 | 353-360 | 226-234 | 263-263 | 151-155 | 190-194 |
| Khalili (DVIT2084)              | 317-319 | 290-290 | 234-243 | 249-249 | 185-194 | 241-247 | 239-253 | 165-183 | 79-83 | 155-177 | 145-151 | 182-188 | 163-165 | 215-215 | 353-375 | 234-234 | 263-263 | 151-155 | 182-186 |
| Khalili tcherni (2663Mtp2)      | 317-319 | 290-294 | 234-243 | 249-257 | 185-194 | 241-254 | 247-249 | 165-165 | 77-83 | 159-159 | 125-151 | 172-182 | 139-165 | 206-214 | 353-361 | 228-240 | 256-263 | 151-151 | 172-186 |
| Khatmi (2190Mtp1)               | 315-315 | 294-294 | 257-259 | 249-271 | 185-194 | 246-247 | 249-249 | 171-183 | 83-83 | 157-177 | 135-143 | 174-178 | 151-167 | 206-210 | 371-371 | 224-236 | 256-263 | 151-151 | 178-184 |
| Khawngi (DVIT2919)              | 317-317 | 294-296 | 225-235 | 247-271 | 183-183 | 247-247 | 235-249 | 169-175 | 77-77 | 155-155 | 123-151 | 172-172 | 167-167 | 206-206 | 344-360 | 238-238 | 263-263 | 151-155 | 176-178 |
| Khindogny (2664Mtp1)            | 319-319 | 290-298 | 257-270 | 257-271 | 181-194 | 241-247 | 239-249 | 165-183 | 79-79 | 149-159 | 133-155 | 178-178 | 151-165 | 210-215 | 357-363 | 226-234 | 263-269 | 149-151 | 182-194 |
| Khir Ghulaman (DVIT0434)        | 319-319 | 290-298 | 241-251 | 249-255 | 181-194 | 247-247 | 243-261 | 171-187 | 79-83 | 159-167 | 125-133 | 188-204 | 147-161 | 204-214 | 329-353 | 234-244 | 254-254 | --      | 176-184 |
| Khorestini (DVIT2605)           | 315-319 | 290-290 | 235-243 | 255-257 | 194-194 | --      | 247-251 | 165-165 | 79-81 | 149-177 | 153-155 | 188-202 | 165-177 | 206-210 | 353-360 | 234-240 | 263-263 | --      | 184-188 |
| Kibraški (2781Mtp1)             | 315-319 | 294-298 | 245-257 | 249-271 | 181-183 | 247-254 | 249-253 | 165-169 | 83-83 | 155-171 | 135-155 | 182-190 | 159-165 | 215-218 | 353-353 | 234-238 | 256-263 | 147-151 | 182-182 |

|                                          |         |         |         |         |         |         |         |         |       |         |         |         |         |         |         |         |         |         |         |
|------------------------------------------|---------|---------|---------|---------|---------|---------|---------|---------|-------|---------|---------|---------|---------|---------|---------|---------|---------|---------|---------|
| Kichmich rond<br>(1678Mtp5)              | 317-319 | 290-290 | 243-247 | 249-271 | 181-189 | 241-254 | 239-249 | 165-165 | 79-79 | 159-177 | 145-151 | 178-188 | 163-165 | 206-210 | 371-373 | 228-234 | 261-263 | 151-155 | 178-194 |
| Kini Yatch<br>(DVIT2495)                 | 319-328 | 290-294 | 233-243 | 247-261 | 179-179 | 247-247 | 241-249 | 165-175 | 75-79 | 159-159 | 131-135 | 188-188 | 139-163 | 204-210 | 347-355 | 228-236 | 256-263 | 149-149 | 172-174 |
| Kishmish Of Vir<br>(DVIT2071)            | 315-319 | 290-298 | 233-245 | 249-249 | 185-194 | 241-247 | 247-253 | 165-169 | 79-83 | 155-177 | 141-155 | 186-204 | 139-163 | 204-218 | 360-360 | 224-234 | 261-263 | 151-155 | 182-188 |
| Kishmish Sorkh<br>(DVIT0437)             | 315-315 | 294-298 | 217-233 | 249-271 | 179-194 | 247-247 | 233-253 | 165-193 | 77-79 | 155-159 | 141-151 | 172-188 | 129-139 | 206-215 | --      | 234-246 | 261-263 | --      | 174-182 |
| Kishmishi (TYR VI<br>14-19)              | 315-328 | 290-294 | 217-217 | 249-255 | 185-194 | 241-247 | 243-253 | 165-193 | 83-83 | 155-167 | 141-151 | 182-188 | 139-165 | 206-210 | --      | 234-240 | 263-263 | 151-155 | --      |
| Kishmishi<br>(DVIT0435)                  | 319-319 | 290-290 | 234-243 | 249-255 | 179-181 | 241-247 | 249-249 | 165-165 | 79-79 | 177-177 | 137-141 | --      | 139-165 | 214-215 | 360-375 | 234-246 | 263-263 | 151-155 | 184-186 |
| Kisil izium<br>(0Mtp589)                 | 315-319 | 290-294 | 233-234 | 249-249 | 179-179 | 241-247 | 245-253 | 183-183 | 79-83 | 153-177 | 135-153 | 178-182 | 147-165 | 206-210 | 353-353 | 240-240 | 256-256 | 151-151 | 178-186 |
| Kisil sapak<br>(746Mtp1)                 | 315-319 | 294-306 | 257-270 | 271-271 | 179-187 | 246-247 | 233-253 | 165-173 | 83-83 | 149-159 | 135-153 | 182-188 | 147-165 | 206-214 | 337-353 | 236-240 | 256-256 | 149-149 | 184-186 |
| Kismis Vatkana<br>(20008-14 B)           | 315-319 | 294-298 | 217-233 | 249-271 | 179-194 | 247-254 | 239-249 | 165-183 | 77-83 | 177-177 | 137-145 | 164-190 | 139-163 | 206-215 | 353-353 | 234-240 | 261-263 | --      | 178-182 |
| Kismish<br>Turkmenskii<br>(Turkmn 19697) | 317-317 | 290-298 | 243-257 | 249-271 | 181-181 | --      | 233-253 | 183-193 | 79-83 | 155-177 | 135-145 | 188-188 | 165-165 | 210-215 | 353-353 | --      | 256-261 | 149-155 | 182-186 |
| Kizil Sapak<br>(Turkmn 545)              | 319-319 | 290-294 | 235-257 | 249-251 | 179-185 | 247-247 | 243-253 | 185-193 | 79-83 | 159-159 | 133-135 | 164-188 | 147-165 | 206-210 | 347-353 | 232-234 | 256-256 | 149-151 | 178-186 |
| Kizil sapak<br>(0Mtp414)                 | 319-321 | 290-290 | 245-247 | 249-251 | 179-185 | 247-249 | 247-253 | 165-185 | 83-83 | 159-159 | 133-153 | 182-188 | 165-165 | 206-206 | 347-353 | 234-234 | 256-256 | 149-151 | 176-186 |
| Kondori 01 (2001-<br>9-8100-01)          | 315-319 | 290-294 | 234-257 | 249-249 | 185-193 | 246-246 | 243-247 | 165-171 | 75-79 | 155-155 | 137-151 | 174-182 | 165-167 | 206-215 | 353-360 | 236-240 | 256-263 | --      | 188-192 |
| Koptcha<br>(DVIT0783)                    | 315-327 | 290-294 | 227-247 | 251-271 | 181-181 | 247-255 | 239-249 | 169-183 | 77-79 | 155-159 | 133-143 | 168-204 | --      | 206-206 | 353-360 | 238-240 | 263-263 | 149-149 | 174-182 |
| Korza erevani<br>(0Mtp610)               | 315-315 | 290-298 | 217-235 | 249-271 | 185-194 | 241-254 | 239-247 | 177-183 | 83-83 | 155-155 | 137-151 | 188-188 | 165-165 | 215-215 | 357-357 | 234-240 | 261-263 | 151-155 | 176-182 |
| Kouldjinski<br>(DVIT2680)                | 303-315 | 290-294 | 243-243 | 249-271 | 179-181 | 241-254 | 233-247 | 165-173 | 77-83 | 149-155 | 143-151 | 172-188 | 165-165 | 210-215 | 353-353 | 228-240 | 256-263 | 151-155 | 172-184 |

|                                   |         |         |         |         |         |         |         |         |       |         |         |         |         |         |         |         |         |         |         |
|-----------------------------------|---------|---------|---------|---------|---------|---------|---------|---------|-------|---------|---------|---------|---------|---------|---------|---------|---------|---------|---------|
| Kovalewka<br>(DVIT0329)           | 319-325 | 294-294 | 235-276 | 249-257 | 179-179 | 247-254 | 239-249 | 165-181 | 79-83 | 155-155 | 133-145 | 186-206 | 151-165 | 206-206 | 353-361 | 238-246 | 263-263 | 149-149 | 188-194 |
| Koz ouzioum<br>(2635Mtp1)         | 315-319 | 294-294 | 233-257 | 271-271 | 185-194 | 246-249 | 249-249 | 171-183 | 83-83 | 155-157 | 135-137 | 178-202 | 151-165 | 206-210 | 353-360 | 234-236 | 263-263 | 151-151 | 178-184 |
| Kule Dary<br>(DVIT1070)           | --      | 290-294 | 233-257 | 249-271 | 179-179 | 247-247 | 235-245 | 165-183 | --    | 177-177 | 125-153 | 178-182 | 165-165 | 210-214 | 353-353 | 236-240 | 256-256 | 151-151 | 186-190 |
| Kush Dzhumurtka<br>(Turkmn 18820) | 315-328 | 290-294 | 247-271 | --      | 179-187 | 246-254 | 233-233 | 165-165 | 77-83 | 159-173 | 137-155 | 164-182 | 165-165 | 210-215 | 353-353 | 240-240 | 256-263 | 149-151 | 186-190 |
| Kwar II<br>(DVIT2452)             | 317-317 | 290-298 | 235-257 | 249-255 | 179-189 | 246-254 | 243-247 | 165-165 | 75-79 | 177-177 | 133-151 | 188-190 | 163-165 | 215-215 | 355-360 | 226-240 | 263-263 | 151-155 | 160-190 |
| Lal Sorkh<br>(DVIT0442)           | 319-319 | 290-298 | 243-245 | 249-271 | 179-194 | 249-254 | 239-247 | 165-165 | 79-83 | 173-177 | 145-155 | 172-190 | 163-177 | 215-215 | 353-353 | 234-238 | 261-263 | 149-155 | 178-190 |
| Late Vavilov<br>(ARM Q01-16)      | 315-319 | 290-290 | 233-243 | 249-271 | 179-194 | 247-247 | 249-253 | 165-169 | 77-79 | 177-177 | 125-151 | 182-202 | 139-165 | 210-215 | 360-376 | 234-240 | 263-263 | 151-155 | 182-186 |
| Leanoy<br>(DVIT2641)              | 315-319 | 288-294 | 239-257 | 243-271 | --      | 246-246 | 249-249 | 171-183 | 79-83 | 149-157 | 135-145 | 172-202 | 165-165 | 206-206 | 353-357 | 228-236 | 263-263 | 151-151 | 178-188 |
| Liali bidona<br>(0Mtp1475)        | 317-319 | 290-290 | 217-243 | 249-257 | 185-194 | 246-247 | 239-239 | 165-183 | 79-83 | 173-177 | 145-151 | 188-188 | 165-167 | 206-206 | 355-355 | 226-234 | 256-263 | 147-155 | 178-184 |
| Liali Yakdona<br>(0Mtp640)        | 315-319 | 294-294 | 243-243 | 249-257 | 179-185 | 247-254 | 233-249 | 183-193 | 83-83 | 155-155 | 135-135 | 182-182 | 165-165 | 206-210 | 353-360 | 228-236 | 256-263 | 149-155 | 172-190 |
| Lkeni noir<br>(2640Mtp1)          | 328-328 | 294-298 | 239-257 | 271-271 | 181-185 | 241-241 | 239-239 | 165-183 | 75-79 | 151-167 | 125-137 | 172-190 | 139-165 | 214-215 | 343-353 | 234-240 | 256-263 | 149-149 | 178-180 |
| Long Yan<br>(0Mtp828)             | 319-338 | 290-290 | 243-243 | 257-271 | 193-194 | 241-247 | 233-247 | 165-183 | 77-79 | 149-149 | 143-167 | 164-172 | 165-165 | 214-215 | 353-378 | 234-236 | 263-263 | 151-151 | 170-182 |
| Malahy<br>(0Mtp1449)              | 319-319 | 298-306 | 257-270 | 255-271 | 185-194 | 241-247 | 239-247 | 183-183 | 77-79 | 155-173 | 135-135 | 178-213 | 139-151 | 210-214 | 360-360 | 236-246 | 256-265 | 149-151 | 172-182 |
| Mamidon (Turkmn<br>3025)          | 319-328 | 290-298 | 217-247 | 271-271 | --      | 247-254 | 233-251 | 165-165 | 79-83 | 155-159 | 135-153 | 164-188 | 139-147 | 206-206 | 353-357 | 234-240 | 263-263 | 149-151 | 184-190 |
| Mamidon Deli<br>(Turkmn 6984)     | 315-328 | 290-290 | 217-257 | 249-271 | 179-179 | 247-254 | 233-251 | 169-193 | 79-83 | 153-177 | 135-153 | 182-188 | 147-151 | 206-206 | 353-353 | 240-240 | 263-263 | 149-149 | 174-186 |
| Mamidon Kizil<br>(Turkmn 21604)   | 317-328 | 290-298 | 217-257 | --      | 179-185 | 241-254 | 249-251 | 165-169 | 79-79 | --      | 139-153 | 164-182 | --      | 206-206 | --      | 226-240 | 256-263 | 149-151 | 174-190 |
| Matrassa<br>(0Mtp703)             | 315-317 | 294-298 | 234-243 | 257-259 | 179-185 | 241-246 | 233-243 | 173-183 | 81-83 | 149-149 | 125-141 | 172-172 | 165-177 | 206-206 | 360-360 | --      | 256-267 | 149-151 | 186-188 |

|                                         |         |         |         |         |         |         |         |         |       |         |         |         |         |         |         |         |         |         |         |
|-----------------------------------------|---------|---------|---------|---------|---------|---------|---------|---------|-------|---------|---------|---------|---------|---------|---------|---------|---------|---------|---------|
| Matrassa<br>(2642Mtp2)                  | 315-315 | 288-290 | 239-270 | 243-251 | 181-185 | 241-241 | 249-262 | 183-183 | 77-79 | 159-167 | 135-145 | 186-202 | 151-165 | 206-210 | 357-368 | 228-240 | 256-265 | 151-151 | 178-182 |
| Mehdi 01 (2001-9-<br>8101-01)           | --      | 294-294 | 257-257 | --      | 179-193 | 241-247 | 233-249 | 165-171 | 75-83 | 159-159 | 135-143 | 178-182 | --      | 210-215 | --      | 234-236 | 256-263 | 149-149 | 184-186 |
| Mellei (Turkmm<br>3030)                 | 315-319 | 290-294 | 235-247 | 261-271 | 179-185 | 249-254 | 249-253 | 187-193 | 79-79 | 153-176 | 139-153 | 164-188 | 165-165 | 206-210 | 353-353 | 234-234 | 256-256 | 149-149 | 184-190 |
| Mermark<br>(DVIT1042)                   | 315-319 | 290-306 | 243-257 | 261-271 | 179-179 | 247-247 | 239-249 | 185-185 | 79-79 | 149-149 | 125-143 | 182-214 | 159-167 | 206-218 | --      | 232-236 | 263-263 | 149-151 | 176-176 |
| Mesisti rose<br>(0Mtp1795)              | 320-326 | 290-298 | 243-243 | 257-263 | 181-185 | 246-247 | 233-247 | 165-171 | 79-79 | 149-159 | 135-135 | 202-207 | 151-165 | 206-215 | 347-368 | 228-236 | 263-267 | 151-157 | 188-194 |
| Millishun<br>(DVIT2498)                 | 315-328 | 290-294 | 235-247 | 271-271 | 179-189 | 241-254 | 249-249 | 173-181 | 83-83 | 153-153 | 141-141 | 186-188 | 139-165 | 206-214 | 358-358 | 234-238 | 263-263 | 149-151 | 174-174 |
| Monaca<br>(1742Mtp1)                    | 319-319 | 290-290 | 217-234 | 255-257 | 194-194 | 241-247 | 243-245 | 165-165 | 79-83 | 155-155 | 143-151 | 182-190 | 139-165 | 214-218 | 357-360 | 234-234 | 263-263 | 151-155 | 182-186 |
| Monukka<br>(DVIT0462)                   | 317-319 | 290-290 | 217-243 | 249-255 | 181-194 | 247-247 | 253-253 | 165-183 | 79-79 | 177-177 | 141-151 | 182-188 | 163-165 | 215-215 | 353-375 | 234-240 | 261-263 | 155-155 | 178-184 |
| Mouchketny<br>(0Mtp750)                 | 315-315 | 294-294 | 257-257 | 263-271 | 179-179 | 253-263 | 243-249 | 165-183 | 77-77 | --      | 133-133 | 182-205 | 165-165 | 206-215 | 371-371 | 228-228 | 261-263 | 147-147 | 182-182 |
| Mourvedre<br>Famellestadt<br>(DVIT0319) | 315-319 | 290-290 | 243-257 | 239-255 | 179-189 | 241-247 | 249-249 | 171-187 | 83-83 | 161-167 | 133-151 | 178-178 | 165-165 | 206-215 | 353-360 | 226-240 | 263-263 | 151-157 | 178-190 |
| Murma Isium<br>(DVIT0320)               | 315-319 | 290-294 | 257-257 | 255-261 | 179-185 | 252-256 | 239-253 | 171-195 | 77-83 | 155-173 | 143-149 | 168-188 | 166-177 | 206-206 | 355-377 | 238-240 | 256-263 | 147-149 | 178-188 |
| Mzivani (TYR VI<br>15-13)               | 311-319 | 288-294 | 235-239 | 261-271 | 179-179 | 241-254 | 249-253 | 165-171 | 77-79 | 157-163 | 135-141 | 166-180 | 139-163 | 206-214 | 345-353 | 234-240 | 263-263 | 149-151 | 178-194 |
| Namonia<br>(DVIT2511)                   | 289-328 | 290-294 | 233-237 | 255-273 | 179-194 | 247-247 | 239-249 | 165-167 | 75-77 | 153-177 | 145-153 | 166-182 | 139-165 | 206-215 | 355-355 | 234-248 | 256-263 | 151-151 | 168-184 |
| Narma (2648Mtp2)                        | 303-319 | 290-294 | 235-257 | 243-271 | 183-194 | 249-263 | 245-249 | 183-183 | 79-83 | 159-177 | 135-149 | 178-202 | 139-165 | 206-206 | 353-353 | 234-236 | 263-265 | 151-151 | 176-188 |
| Nassau (0Mtp780)                        | 303-315 | 290-306 | 235-235 | 239-257 | 189-189 | 247-253 | 239-239 | 165-187 | 77-77 | 149-159 | 143-145 | 166-178 | 165-173 | 206-212 | 353-353 | 240-246 | 263-263 | 149-151 | 176-182 |
| Neeli (DVIT2514)                        | 315-328 | --      | 243-247 | 257-257 | 179-194 | --      | 249-253 | 165-167 | 79-81 | --      | 135-155 | 182-188 | 165-165 | 206-206 | 357-360 | 232-240 | 263-263 | 147-155 | 172-184 |

|                                         |         |         |         |         |         |         |         |         |       |         |         |         |         |         |         |         |         |         |         |
|-----------------------------------------|---------|---------|---------|---------|---------|---------|---------|---------|-------|---------|---------|---------|---------|---------|---------|---------|---------|---------|---------|
| Neelilay<br>(DVIT2507)                  | 289-315 | 294-294 | 235-257 | 249-251 | 179-181 | 247-247 | 239-251 | 165-165 | 77-83 | 149-173 | 135-143 | 188-190 | 165-165 | 215-215 | 358-361 | 236-240 | 263-263 | 151-151 | 174-190 |
| Nimrang (TYR VI<br>15-17)               | 319-319 | 290-290 | 234-243 | 249-271 | 185-194 | 247-254 | 243-247 | 165-183 | 77-79 | 155-177 | 143-151 | 172-188 | 165-165 | 206-215 | 353-360 | 228-234 | 256-263 | 151-151 | 172-184 |
| Nimrang rouge<br>(2736Mtp1)             | 315-317 | 290-294 | 234-243 | 257-257 | 185-194 | 241-246 | 233-243 | 173-183 | 77-83 | 155-155 | 143-151 | 172-202 | 165-165 | 206-215 | 360-360 | 236-240 | 256-267 | 151-151 | 186-188 |
| Noir D'automne<br>(DVIT0330)            | 315-315 | 290-294 | 257-275 | 251-271 | 194-194 | 247-247 | 239-249 | 183-183 | 79-83 | 157-177 | 135-137 | 178-202 | 151-165 | 206-214 | 353-371 | 232-236 | 256-263 | 151-151 | 178-180 |
| Norakert PRG 2224<br>(DVIT2683)         | 319-321 | 298-308 | 239-271 | 261-271 | 179-194 | 241-247 | 239-255 | 183-183 | 77-79 | 149-173 | 125-145 | 182-202 | 163-165 | 214-214 | 353-353 | 234-246 | --      | --      | 172-194 |
| Nosargoon<br>(DVIT2533)                 | 315-317 | 290-290 | 235-243 | 255-273 | 187-194 | 241-247 | 243-253 | 165-183 | 77-83 | 165-167 | 135-151 | 172-202 | 139-165 | 204-206 | 355-360 | 226-240 | 263-263 | 155-155 | 178-178 |
| Noulizok<br>(2649Mtp1)                  | 315-319 | 290-290 | 233-243 | 257-271 | 185-194 | 241-254 | 249-253 | 165-169 | 79-83 | 149-149 | 135-135 | 182-182 | 139-165 | 206-218 | 356-357 | 234-236 | 256-263 | 147-151 | 174-188 |
| Nunaka Sia<br>(DVIT2045)                | 315-317 | 290-290 | 217-259 | 249-271 | 185-194 | 254-264 | 239-249 | 165-165 | 83-83 | 155-159 | 145-151 | 172-190 | 163-165 | 206-206 | 371-371 | 228-234 | 263-263 | 147-151 | 178-182 |
| Oktiabrskii<br>(2854Mtp1)               | 319-319 | 290-290 | 234-245 | 249-251 | 185-194 | 241-247 | 243-243 | 165-183 | 77-83 | 157-177 | 135-151 | 172-188 | 165-167 | 206-208 | 353-357 | 232-234 | 256-263 | 149-151 | 184-188 |
| Orion (Turkmen<br>30748)                | 303-315 | 290-294 | 235-235 | 247-271 | 185-189 | 241-254 | 247-253 | 183-193 | 79-79 | 173-177 | 135-139 | 172-188 | 151-165 | 204-210 | 353-353 | 232-234 | 256-263 | 149-151 | 172-190 |
| Otcha bala<br>(2952Mtp1)                | 303-317 | 290-294 | 233-243 | 249-255 | 179-194 | 246-254 | 245-253 | 165-193 | 77-77 | 167-177 | 135-151 | 178-182 | 165-165 | 210-210 | 353-353 | 228-234 | 263-263 | 151-155 | 184-188 |
| Ozaan Daii<br>(2075Mtp1)                | 315-319 | 290-298 | 235-243 | 249-271 | 181-185 | 247-254 | 239-249 | 171-183 | 77-79 | 155-159 | 135-145 | 168-188 | 165-165 | 206-220 | 353-363 | 234-246 | 261-263 | 147-155 | 182-184 |
| Pakistan Collection<br>25168 (DVIT2282) | 315-328 | 290-294 | 233-235 | 251-255 | 189-189 | 246-246 | 231-253 | 165-165 | 77-79 | 165-167 | 135-151 | 164-188 | 163-165 | 210-214 | 355-360 | 228-240 | 263-263 | 151-155 | 178-186 |
| Pakistan Collection<br>25180 (DVIT2269) | --      | --      | --      | --      | 187-189 | --      | 231-253 | --      | --    | --      | 135-151 | 164-188 | --      | --      | --      | 228-240 | --      | --      | --      |
| Pakistan Collection<br>25237 (DVIT2272) | 315-317 | 290-294 | 235-243 | 251-255 | 185-194 | 247-247 | 251-253 | 165-173 | 77-79 | 149-165 | 135-151 | 188-202 | 139-165 | 206-214 | 357-360 | 232-240 | 263-263 | 149-155 | 178-194 |
| Pakistan Collection<br>25241 (DVIT2271) | 315-319 | 290-294 | 243-247 | 255-255 | 179-194 | 246-246 | 249-251 | 169-173 | 77-79 | 165-167 | 135-135 | 164-188 | 139-165 | 206-214 | 357-360 | 232-234 | 263-263 | 151-155 | 186-194 |
| Pakistan Collection<br>25265 (DVIT2293) | 289-319 | 290-294 | 235-247 | 257-271 | 189-189 | 241-254 | 249-249 | 173-181 | 83-83 | 173-173 | 135-141 | 172-182 | 139-139 | 206-206 | 353-353 | 228-246 | 256-263 | 151-151 | 172-174 |

|                                         |         |         |         |         |         |         |         |         |       |         |         |         |         |         |         |         |         |         |         |
|-----------------------------------------|---------|---------|---------|---------|---------|---------|---------|---------|-------|---------|---------|---------|---------|---------|---------|---------|---------|---------|---------|
| Pakistan Collection<br>25275 (DVIT2263) | 319-328 | 290-306 | 235-247 | 243-257 | 185-189 | 241-246 | 249-249 | --      | 77-83 | 141-159 | 131-133 | 164-190 | 151-165 | 210-214 | 347-353 | 226-246 | 263-263 | 151-151 | 166-190 |
| Pakistan Collection<br>25290 (DVIT2296) | 289-328 | 290-290 | 233-235 | 257-271 | 179-179 | 247-254 | 249-249 | 165-185 | 81-83 | 141-153 | 125-141 | 182-182 | 165-165 | 204-214 | 347-347 | 228-234 | 263-263 | 147-151 | 178-194 |
| Pakistan Collection<br>25296 (DVIT2283) | 289-317 | 294-306 | 235-243 | 251-261 | 181-181 | 247-254 | 243-251 | 165-173 | 79-79 | 165-173 | 135-151 | 182-202 | 141-165 | 214-214 | 355-361 | 232-248 | 263-265 | --      | 178-190 |
| Pakistan Collection<br>25311 (DVIT2264) | 315-317 | --      | 235-243 | 243-255 | 179-185 | 247-247 | 239-253 | 165-173 | 77-83 | 149-165 | 147-151 | 172-202 | 141-165 | 204-206 | 353-353 | 232-240 | 263-263 | 149-151 | 172-194 |
| Paragoon<br>(DVIT2502)                  | 317-328 | 290-294 | 233-243 | 243-255 | 179-185 | 246-246 | 251-251 | 165-169 | 77-83 | 149-159 | 141-151 | 182-188 | 139-165 | 206-210 | 355-360 | 226-240 | 263-263 | 149-149 | 172-194 |
| Parkent<br>(2691Mtp1)                   | 313-319 | 290-294 | 243-243 | 257-271 | 183-194 | 247-247 | 233-247 | 165-183 | 79-83 | 155-177 | 143-151 | 172-172 | 165-177 | 206-215 | 353-353 | 228-236 | 256-256 | 149-151 | 184-186 |
| Peikani (2597Mtp1)                      | 319-329 | 294-298 | 243-257 | 271-271 | 183-194 | 241-247 | 239-239 | 169-173 | 79-83 | 163-177 | 137-141 | 174-174 | 163-165 | 206-206 | 353-353 | 236-240 | 263-263 | 147-151 | 178-190 |
| Persian R27<br>(DVIT2755)               | 317-317 | 294-294 | 225-243 | 247-271 | 183-185 | 247-247 | 241-249 | 169-175 | 79-79 | 155-167 | 123-133 | 166-172 | 163-163 | 206-206 | 346-360 | 232-232 | 263-263 | 149-155 | 174-184 |
| Pervenetz<br>Praskoveisky<br>(2651Mtp2) | 317-328 | 290-294 | 239-257 | 243-261 | 179-181 | 247-253 | 249-259 | 167-193 | 83-83 | 167-167 | 125-145 | --      | 165-165 | 208-210 | 353-368 | 234-240 | 256-267 | 151-151 | 172-188 |
| Pinger putao<br>(2788Mtp1)              | 319-338 | 290-290 | 243-257 | 271-271 | 179-194 | 247-247 | 239-247 | 165-173 | 79-79 | 145-145 | 143-155 | 172-202 | 139-165 | 210-215 | 353-357 | 236-236 | 263-263 | 151-151 | 170-184 |
| Porsi Shekerek<br>(Turkmn 19735)        | 315-315 | 290-294 | 243-257 | 271-271 | --      | 241-254 | 243-245 | 171-193 | 79-83 | 159-177 | 137-155 | 178-190 | 165-165 | 206-210 | --      | --      | 256-263 | 151-151 | 184-190 |
| Precoce D'astrachan<br>(DVIT0321)       | --      | --      | 257-274 | --      | 185-194 | --      | 245-249 | 165-183 | 79-83 | 157-177 | 135-137 | 186-202 | --      | 210-214 | --      | 228-236 | 263-263 | 147-151 | 180-184 |
| Précoce d'Astrakan<br>(0Mtp928)         | 315-319 | 294-298 | 257-274 | 255-271 | 185-194 | 246-247 | 245-249 | 165-183 | 79-83 | 157-177 | 135-137 | 186-202 | 151-165 | 210-214 | 353-373 | 228-236 | 263-263 | 147-151 | 180-184 |
| Rajoulan<br>(0Mtp950)                   | 319-319 | 290-294 | 243-257 | 251-271 | --      | 254-264 | 247-249 | 165-183 | 79-79 | 163-171 | 143-151 | 174-182 | 159-167 | 206-215 | 353-371 | 226-228 | 263-263 | 149-149 | 174-182 |
| Ranny Vira<br>(2654Mtp1)                | 319-319 | 290-298 | 216-257 | 249-271 | 181-183 | 253-253 | 249-249 | 165-183 | 79-79 | 167-171 | 151-151 | 182-202 | 159-163 | 204-218 | 353-356 | 234-238 | 261-263 | 147-151 | 178-182 |
| Razakiia piembiana<br>(2737Mtp1)        | 315-315 | 290-294 | 233-243 | 271-271 | 181-185 | 241-246 | 239-249 | 173-183 | 79-79 | 165-177 | 135-145 | 186-207 | 163-175 | 206-206 | 353-368 | 236-246 | 263-263 | 149-151 | 178-178 |

|                                  |         |         |         |         |         |         |         |         |       |         |         |         |         |         |         |         |         |         |         |
|----------------------------------|---------|---------|---------|---------|---------|---------|---------|---------|-------|---------|---------|---------|---------|---------|---------|---------|---------|---------|---------|
| Raziki (1750Mtp1)                | 315-319 | 290-306 | 243-253 | 255-255 | 179-179 | 247-254 | 239-251 | 171-183 | 83-83 | 149-173 | 133-135 | 182-208 | 165-165 | 214-215 | 368-371 | 226-238 | 261-263 | 149-151 | 176-178 |
| Red Ohanez (DVIT0499)            | 315-323 | 294-294 | 233-233 | 257-271 | 185-185 | 241-254 | 239-249 | 183-187 | 79-83 | 147-159 | 135-145 | 178-188 | 165-165 | 206-215 | 357-357 | 226-232 | 263-263 | 149-149 | 172-174 |
| Rhazaki (Pa 1882) (TYR VI 16-09) | 315-315 | 290-294 | 233-257 | 257-271 | 183-185 | 254-254 | 239-249 | 183-183 | 77-79 | 147-159 | 133-135 | 166-188 | 165-177 | 206-206 | 353-357 | 228-234 | 263-263 | --      | 172-182 |
| Rhazaki Anatolico (DVIT0608)     | 315-328 | 290-294 | 227-243 | 271-271 | 179-194 | 254-264 | 247-253 | 165-169 | 77-83 | 149-155 | 135-151 | 164-202 | 159-165 | 206-206 | 355-368 | 234-236 | 263-263 | 151-151 | 174-184 |
| Rhazaki De Crete (DVIT0501)      | 315-315 | 290-294 | 233-257 | 257-271 | 179-194 | 254-254 | 243-249 | 183-183 | 77-79 | 147-159 | 133-135 | 166-188 | 165-177 | 206-206 | 353-357 | 226-238 | --      | 149-149 | 172-182 |
| Rhazaki Mavro (DVIT0555)         | 319-319 | 290-290 | 243-259 | 257-271 | 181-185 | 247-264 | 249-249 | 165-183 | 77-83 | 157-173 | 133-151 | 188-206 | 167-173 | 206-210 | 353-361 | 228-234 | 263-263 | 149-151 | 174-194 |
| Rish Baba (HOP L04-19)           | 315-319 | 290-290 | 243-257 | 249-271 | 194-194 | 247-247 | 243-243 | 165-173 | 79-79 | 149-149 | 147-155 | 182-202 | 139-177 | 210-214 | 353-360 | 224-234 | 263-267 | 155-155 | 182-184 |
| Rizamat (DVIT2338)               | 319-319 | 290-294 | 233-243 | 255-257 | 179-194 | 247-249 | 233-253 | 165-183 | 79-83 | 153-177 | 151-155 | 172-182 | 177-177 | 215-218 | 353-353 | 228-240 | 256-263 | 149-155 | 178-184 |
| Rouchaki (2783Mtp1)              | 315-315 | 290-298 | 217-235 | 249-271 | 179-181 | 241-247 | 239-247 | 165-183 | 79-83 | 173-177 | 151-151 | 178-188 | 163-177 | 206-210 | 353-353 | 234-238 | 261-263 | 147-155 | 182-182 |
| Sabza angur (0Mtp1007)           | 315-319 | 290-294 | 233-243 | 271-273 | 185-194 | 247-254 | 239-249 | 165-169 | 83-83 | 155-167 | 151-155 | 182-202 | 139-165 | 206-218 | 356-356 | 234-240 | 263-263 | 147-151 | 184-188 |
| Sahami (2090Mtp1)                | 319-319 | 294-294 | 245-270 | 271-271 | 179-194 | 241-264 | 239-249 | 169-181 | 77-77 | 149-149 | 133-151 | 202-202 | 159-165 | 210-214 | 356-357 | 238-246 | 263-263 | 147-151 | 172-182 |
| Sahebi (0Mtp587)                 | 317-319 | 290-294 | 234-234 | 249-257 | 179-194 | 241-241 | 243-253 | 165-183 | 79-83 | 149-149 | 135-151 | 172-182 | 139-151 | 206-214 | 360-375 | 240-240 | 256-263 | 151-155 | 186-188 |
| Sahibi (DVIT0509)                | 317-317 | 290-294 | 245-259 | 257-271 | 194-194 | 247-249 | 247-253 | 165-173 | 79-79 | 155-173 | 141-145 | 172-182 | 139-163 | 215-215 | 353-353 | 238-240 | 261-263 | 151-155 | 188-194 |
| Sahibi Sorkh (DVIT0510)          | 317-317 | 294-298 | 243-257 | 249-271 | 179-179 | 247-249 | 235-247 | 165-165 | 79-83 | 159-177 | 135-145 | 172-182 | 165-177 | 206-215 | 353-361 | 238-240 | --      | 151-155 | 178-186 |
| Sahili (2078Mtp1)                | 315-319 | 290-298 | 243-247 | 255-271 | 179-185 | 247-247 | 239-247 | 165-183 | 77-83 | 173-173 | 135-135 | 186-202 | 165-165 | 206-214 | 343-371 | 246-246 | 263-263 | 151-151 | 178-184 |
| Said guliami (0Mtp1010)          | 319-319 | 290-290 | 233-257 | 249-271 | 194-194 | 246-247 | 243-249 | 165-165 | 79-79 | 149-159 | 151-155 | 176-202 | 139-177 | 206-214 | 347-353 | 234-234 | 263-267 | 151-155 | 182-190 |
| Salomani (DVIT0597)              | 315-315 | --      | 235-243 | 249-255 | 185-193 | 246-250 | 239-249 | --      | 79-79 | 149-173 | 133-143 | --      | 139-165 | 206-210 | 357-357 | 230-230 | 256-263 | 151-155 | 176-190 |

|                                   |         |         |         |         |         |         |         |         |       |         |         |         |         |         |         |         |         |         |         |
|-----------------------------------|---------|---------|---------|---------|---------|---------|---------|---------|-------|---------|---------|---------|---------|---------|---------|---------|---------|---------|---------|
| Sary Aygyr<br>(Turkmn 6987)       | 315-315 | 290-294 | 233-247 | 251-271 | 179-185 | 247-247 | 235-249 | 165-165 | 79-79 | 149-177 | 125-153 | 186-188 | 165-165 | 210-210 | 353-355 | 236-240 | 256-263 | 151-151 | 178-186 |
| Sary Kiriak<br>(0Mtp1031)         | 315-319 | 288-290 | 233-257 | 271-271 | 181-189 | 241-255 | 239-259 | 165-193 | 79-79 | 155-159 | 133-145 | 172-174 | 165-165 | 204-215 | 343-353 | 226-228 | 263-263 | 149-151 | 180-186 |
| Satani tcherny<br>(388Mtp2)       | 315-317 | 290-298 | 217-257 | 249-249 | 181-194 | 247-247 | 239-243 | 165-165 | 79-83 | --      | --      | 188-202 | 163-177 | 206-214 | 360-360 | 224-234 | 263-267 | 155-155 | 178-184 |
| Schiradzouli violet<br>(1737Mtp1) | 315-317 | 294-306 | 235-235 | 249-271 | 185-189 | 241-254 | 239-249 | 165-173 | 79-83 | 149-155 | 133-145 | 174-178 | 163-165 | 204-215 | 353-363 | 236-240 | 263-263 | 149-151 | 178-194 |
| Schwin<br>(DVIT2604)              | 317-328 | 290-290 | 243-245 | 255-271 | 179-179 | 247-247 | 243-249 | 165-165 | 77-83 | 149-167 | 145-151 | 188-190 | 163-165 | 206-210 | 347-353 | 234-236 | 263-263 | 149-151 | 172-196 |
| Selection 2798<br>(DVIT1152)      | --      | 294-306 | 217-233 | 249-271 | 181-185 | 247-254 | 249-249 | 183-185 | 78-83 | 155-159 | 133-135 | 166-202 | 163-165 | 206-210 | 353-357 | 226-234 | 263-263 | 149-155 | 172-182 |
| Shahani 01 (2001-<br>9-7097-01)   | 315-319 | 294-294 | 235-235 | 257-271 | 179-179 | 247-247 | 247-249 | 181-183 | 77-79 | 149-159 | 135-145 | 178-202 | 165-175 | 214-220 | 357-362 | 224-234 | 263-263 | 151-151 | 180-182 |
| Shakar Angur<br>(TYR VI 16-21)    | 317-317 | 290-294 | 243-243 | 249-259 | 179-194 | 241-254 | 247-253 | 165-183 | 77-79 | 149-149 | 137-141 | 172-182 | 165-165 | 210-215 | 353-360 | 234-236 | 256-263 | 151-155 | 172-188 |
| Shingargoon<br>(DVIT2603)         | 315-315 | 290-306 | 235-247 | 247-255 | 185-185 | 246-246 | 249-249 | 169-183 | 77-83 | 153-159 | 133-145 | 164-172 | 165-165 | 206-210 | --      | 226-234 | 263-263 | --      | 172-190 |
| Shirazi (2079Mtp1)                | 315-317 | 298-298 | 235-243 | 249-271 | 181-194 | 247-247 | 247-253 | 165-173 | 79-79 | 155-167 | 141-145 | 182-188 | 165-165 | 206-214 | 353-353 | 234-238 | 263-263 | 151-151 | 182-184 |
| Shtur Angur<br>(DVIT2168)         | 315-319 | 290-290 | 227-233 | 255-271 | 181-194 | 254-256 | 249-253 | 169-183 | 77-77 | 155-155 | 143-143 | 166-178 | 177-187 | 206-206 | 360-360 | 236-238 | 263-263 | 149-149 | 174-190 |
| Siah (2074Mtp1)                   | 319-319 | 290-298 | 235-243 | 255-271 | 181-185 | 247-247 | 239-239 | 165-165 | 79-83 | 159-173 | 135-141 | 182-190 | 139-177 | 206-210 | 353-353 | 238-240 | 263-263 | 147-149 | 182-182 |
| Siborskory<br>(2681Mtp1)          | 315-319 | 294-294 | 233-257 | 261-263 | 179-181 | 255-255 | 239-239 | 165-181 | 79-83 | 155-159 | 133-143 | 166-207 | 151-165 | 206-206 | 353-377 | 228-238 | 263-263 | 149-149 | 158-194 |
| Sochal (DVIT1126)                 | 315-317 | 294-298 | 243-245 | 257-271 | 179-185 | 247-247 | 243-249 | 169-193 | 77-79 | 167-177 | 125-151 | 164-202 | 139-165 | --      | 353-353 | 234-238 | 256-263 | 151-155 | 178-182 |
| Soiaki (2657Mtp1)                 | 319-319 | 290-290 | 243-243 | 243-257 | 181-185 | 241-247 | 233-243 | 165-165 | 83-83 | 167-177 | 135-141 | 172-182 | 139-151 | 206-214 | 347-353 | 228-240 | 256-263 | 149-151 | 188-194 |
| Soultani<br>(0Mtp1071)            | 319-319 | 290-290 | 243-243 | 271-273 | 194-194 | 247-247 | 239-247 | 165-165 | 79-79 | 149-149 | 151-155 | 182-190 | 159-165 | 206-215 | 353-375 | 240-240 | 263-263 | 147-155 | 182-186 |
| Sourkhak biely<br>(2856Mtp1)      | 313-315 | 290-298 | 243-245 | 271-271 | 185-194 | 249-254 | 243-243 | 169-193 | 79-79 | 167-167 | 135-141 | 182-202 | 165-177 | 215-218 | 353-356 | 238-240 | 263-267 | 147-149 | 184-188 |

|                                         |         |         |         |         |         |         |         |         |       |         |         |         |         |         |         |         |         |         |         |
|-----------------------------------------|---------|---------|---------|---------|---------|---------|---------|---------|-------|---------|---------|---------|---------|---------|---------|---------|---------|---------|---------|
| Starinky<br>(0Mtp1073)                  | 315-319 | 290-294 | 235-257 | 249-251 | 179-189 | 241-255 | 239-247 | 165-195 | 77-79 | 159-165 | 143-145 | 168-182 | 151-165 | 206-210 | 351-377 | 228-240 | 263-263 | 149-149 | 188-190 |
| Sultanine noire<br>faux (0Mtp1597)      | 315-319 | 290-290 | 217-234 | 249-249 | 181-194 | 247-254 | 243-249 | 173-183 | 79-83 | 149-155 | 125-151 | 190-202 | 163-177 | 206-218 | 356-360 | 226-234 | 256-267 | 147-155 | 182-182 |
| Sumbarskii Bekyi<br>(Turkmn 6304)       | 319-328 | 290-294 | 233-233 | 271-271 | 179-185 | 247-247 | 235-249 | 165-193 | 79-83 | 149-177 | 135-153 | 186-188 | 165-167 | 206-206 | 353-360 | 234-234 | 256-263 | 151-151 | 186-190 |
| Tagobi (2659Mtp1)                       | 319-327 | 290-290 | 243-243 | 257-257 | 179-185 | 241-254 | 245-253 | 165-173 | 77-83 | 155-155 | 125-143 | 172-202 | 165-177 | 206-214 | 353-357 | 228-234 | 256-263 | 151-151 | 172-182 |
| Taifi (DVIT2174)                        | 319-319 | 290-294 | 243-243 | 249-257 | 179-194 | 241-254 | 243-247 | 165-183 | 77-79 | 149-155 | 137-143 | 172-182 | 165-165 | 210-215 | 353-360 | 228-234 | 256-263 | 151-155 | 172-182 |
| Taka Sago (TYR<br>VI 17-03)             | 315-319 | 288-290 | 225-225 | 239-271 | 179-181 | 238-247 | 235-249 | 165-179 | 79-79 | 145-157 | 133-151 | 170-172 | 165-165 | 206-210 | 360-360 | 236-236 | 263-263 | 155-155 | 174-186 |
| Tana-Kuzi<br>(DVIT2928)                 | 319-319 | 290-298 | 237-243 | 243-249 | 179-194 | 246-254 | 243-253 | 165-165 | 79-83 | 149-155 | 125-151 | 188-188 | 165-165 | 210-215 | 353-353 | 234-240 | 263-263 | 151-155 | 182-186 |
| Tarnau (TYR VI<br>17-07)                | 319-319 | 290-290 | 243-243 | 249-271 | --      | 247-254 | 247-249 | 156-160 | 79-79 | 155-159 | 143-151 | 188-188 | 163-165 | 210-215 | 353-371 | 228-228 | 256-263 | 151-155 | 184-194 |
| Tavkveri<br>(1218Mtp1)                  | 315-315 | 288-290 | 234-257 | 249-271 | 185-193 | 241-246 | 239-247 | 165-173 | 77-83 | 155-167 | 135-145 | 166-186 | 139-165 | 204-206 | 355-368 | 228-240 | 263-267 | 151-155 | 178-178 |
| Tchatyrbac<br>(664Mtp1)                 | 315-315 | 294-294 | 257-257 | 249-255 | 185-187 | 247-254 | 249-249 | 173-187 | 83-83 | 155-177 | 137-145 | 182-188 | 165-175 | 206-215 | 355-361 | 236-238 | 263-263 | 149-151 | 178-182 |
| Tchilar<br>(DVIT2688)                   | 309-319 | --      | 276-280 | 265-271 | 179-185 | --      | 249-253 | 181-183 | 77-79 | 173-173 | 133-135 | 178-190 | 151-165 | 210-214 | 355-368 | 236-236 | 256-267 | 151-151 | 186-190 |
| Tchiliaki belyi<br>(2671Mtp1)           | 313-319 | 290-294 | 237-243 | 249-257 | 179-194 | 241-247 | 233-247 | 165-165 | 79-79 | 149-167 | 141-151 | 172-182 | 139-165 | 214-215 | 361-375 | 234-236 | 256-263 | 151-155 | 182-186 |
| Tolstokory<br>(1985Mtp2)                | 315-319 | 294-294 | 239-257 | 243-271 | 181-185 | 246-247 | 249-249 | 171-183 | 83-83 | 149-157 | 135-135 | 172-202 | 165-165 | 206-210 | 353-368 | 228-236 | 263-263 | 151-151 | 178-184 |
| Torgoon<br>(DVIT2531)                   | --      | 290-306 | --      | 255-273 | 185-194 | 241-247 | 249-253 | 169-183 | --    | 153-165 | 135-135 | 164-172 | 165-165 | 206-206 | 355-360 | 226-232 | 263-263 | 149-151 | 174-178 |
| Trapanlarin kara S1<br>(0000-0-2411-S1) | 315-315 | 290-294 | 235-257 | 251-271 | 181-183 | 254-254 | 249-253 | 169-189 | 77-79 | 157-159 | 147-155 | 174-186 | 165-167 | 206-210 | 372-374 | 236-246 | 263-263 | 149-151 | 174-174 |
| Tscharma<br>(0Mtp1148)                  | 315-319 | 290-294 | 243-247 | 249-271 | 179-185 | 246-247 | 247-253 | 165-171 | 77-83 | 155-159 | 135-141 | 174-188 | 165-165 | 206-210 | 353-353 | 226-234 | 256-256 | 151-151 | 178-184 |
| Tufachi S1 (1985-<br>0-2415-S1)         | 315-323 | 290-294 | 243-243 | 249-271 | 179-179 | 241-247 | 233-247 | 165-169 | 79-79 | 155-157 | 143-151 | 188-202 | 165-165 | 206-210 | 371-371 | 234-246 | --      | 147-151 | 176-190 |

|                                                   |         |         |         |         |         |         |         |         |       |         |         |         |         |         |         |         |         |         |         |
|---------------------------------------------------|---------|---------|---------|---------|---------|---------|---------|---------|-------|---------|---------|---------|---------|---------|---------|---------|---------|---------|---------|
| Tuia-tiche<br>(2760Mtp1)                          | 317-319 | 290-298 | 235-243 | 249-257 | 185-194 | 241-247 | 243-249 | 165-193 | 77-79 | --      | 135-151 | 182-190 | 139-165 | 206-214 | 353-360 | 234-240 | 263-263 | 151-155 | 186-186 |
| Tuia-tiche p.e.<br>(654Mtp1)                      | 315-319 | 290-294 | 235-257 | 249-271 | 181-187 | 247-253 | 249-249 | 165-169 | 79-79 | 157-173 | 143-149 | 186-207 | 165-165 | 206-206 | 357-371 | 228-248 | 263-263 | 151-151 | 172-188 |
| Uzbekistan Muscat<br>(TYR VI 17-11)               | 303-319 | 288-290 | 233-245 | 255-271 | 181-189 | 247-247 | 239-257 | 169-183 | 83-83 | 159-163 | 133-151 | 172-172 | 163-165 | 206-210 | 353-353 | 222-232 | 261-263 | 149-151 | 178-180 |
| Uzbekistanian<br>Muscat<br>(DVIT2072)             | 319-319 | 294-298 | 233-243 | 255-263 | 179-179 | 247-264 | 251-253 | 183-193 | 77-79 | 171-177 | 133-155 | 172-204 | 165-175 | 210-210 | 375-375 | 232-240 | 263-263 | 149-149 | 178-186 |
| Varuschkin<br>(0Mtp1165)                          | 319-319 | 290-294 | 247-257 | 251-251 | 185-194 | 241-249 | 245-245 | 183-187 | 83-83 | 159-171 | 133-143 | 186-202 | 165-165 | 206-206 | 353-363 | 236-238 | 263-263 | 149-151 | 178-194 |
| Vassarga bielaia<br>(126Mtp2)                     | 313-315 | 290-290 | 245-245 | 255-257 | 183-185 | 247-254 | 233-243 | 165-183 | 83-83 | 145-167 | 125-143 | 174-182 | 151-165 | 206-214 | 357-361 | 236-240 | 263-267 | 151-155 | 184-188 |
| Vassarga tchernaia<br>(2510Mtp1)                  | 315-319 | 290-294 | 233-243 | 249-271 | 179-194 | 247-247 | 249-249 | 165-169 | 77-77 | 155-177 | 125-137 | 164-190 | 139-165 | 206-214 | 353-360 | 234-240 | 256-263 | 151-151 | 182-182 |
| <i>Vitis Vinifera</i><br>#1359 (TYR VI 17-<br>15) | 319-325 | 290-298 | 243-267 | 271-271 | 181-181 | 249-264 | 233-247 | 187-193 | 79-83 | 153-159 | 141-155 | 168-182 | 165-165 | 210-215 | 353-368 | 236-238 | 263-263 | 147-149 | 184-192 |
| Voivoginiova S1<br>(1983-0-2424-S1)               | 319-323 | 290-290 | 257-267 | 251-251 | 181-185 | 254-264 | 249-249 | 183-183 | 83-83 | 155-173 | 135-143 | 168-188 | 165-165 | 206-206 | 353-371 | 226-236 | 263-263 | 157-157 | 178-178 |
| Volgo Don (TYR<br>VI 17-17)                       | 315-315 | 290-298 | 233-257 | 255-271 | 194-194 | 247-249 | 239-253 | 165-165 | 77-77 | 153-157 | 151-155 | 172-182 | 165-177 | 210-210 | 353-375 | 226-240 | 263-263 | --      | 178-188 |
| Yaghotti No. 1<br>(DVIT0604)                      | 315-315 | 290-298 | 243-257 | 249-271 | 185-193 | 254-254 | 249-253 | 171-173 | 83-83 | 167-177 | 143-143 | 182-186 | 165-167 | 215-215 | 353-353 | 224-240 | 263-267 | 151-155 | 182-194 |
| Ya'i izium rose<br>(2687Mtp1)                     | 315-317 | 294-298 | 257-259 | 247-269 | 181-185 | 249-253 | 247-259 | 165-171 | 83-83 | 159-179 | 125-135 | 172-186 | --      | 206-210 | 353-361 | 234-240 | 256-263 | 151-151 | 186-188 |
| Yarghouti (TYR VI<br>17-19)                       | 315-317 | 290-298 | 217-243 | 249-271 | 181-185 | 247-254 | 243-253 | 173-183 | 79-83 | 155-177 | 143-145 | 186-190 | 165-165 | 206-215 | 353-360 | 234-240 | 261-267 | 151-155 | 178-194 |
| Yhsouh ali<br>(2077Mtp1)                          | 315-317 | 290-294 | 235-247 | 251-257 | 179-185 | 241-247 | 249-249 | 165-183 | 77-83 | 147-159 | 135-141 | 178-188 | 139-165 | 214-214 | 353-357 | 226-246 | 256-256 | 151-151 | 172-182 |
| Yumalak lelyi<br>(2679Mtp1)                       | 299-319 | 290-290 | 233-243 | 243-251 | 185-194 | 241-247 | 243-249 | 165-165 | 77-83 | 145-173 | 135-151 | 182-182 | 165-165 | 206-210 | 353-360 | 228-228 | 256-263 | 149-151 | 172-184 |
| Zerk (DVIT0606)                                   | 315-323 | 294-306 | 243-243 | 255-255 | 179-185 | 247-247 | 247-249 | 187-193 | 83-83 | --      | 143-153 | 182-202 | 139-139 | 206-210 | 353-353 | 226-230 | 256-263 | 149-151 | 172-186 |

|                               |         |         |         |         |         |         |         |         |       |         |         |         |         |         |         |         |         |         |         |
|-------------------------------|---------|---------|---------|---------|---------|---------|---------|---------|-------|---------|---------|---------|---------|---------|---------|---------|---------|---------|---------|
| Zimliansky noir<br>(2666Mtp1) | 315-315 | 290-294 | 235-257 | 251-261 | 187-194 | 241-247 | 239-249 | 187-195 | 77-83 | 159-167 | 145-145 | 172-207 | 165-165 | 206-206 | 351-353 | 228-240 | 256-263 | 149-151 | 182-190 |
| Zimsko Belo<br>(DVIT2664)     | 323-323 | 290-294 | 257-257 | 249-249 | 181-185 | 254-254 | 243-247 | 187-187 | 79-79 | 157-167 | 135-143 | 166-188 | 165-177 | 208-210 | 357-357 | 234-246 | 263-263 | 149-151 | 182-188 |
| Arybata<br>(DVIT2442.1)       | 313-313 | 290-294 | 233-235 | 249-271 | 185-189 | 241-248 | 249-249 | 165-165 | 79-83 | --      | 133-151 | 178-186 | 139-139 | 208-210 | 343-360 | 232-234 | 256-267 | 151-151 | 178-178 |
| Arybata<br>(DVIT2442.6)       | --      | 290-294 | 242-251 | 247-249 | 185-185 | 241-241 | 249-249 | 183-183 | 77-83 | 155-155 | 125-133 | 178-186 | 139-163 | 210-210 | 353-368 | 226-240 | 256-256 | 151-151 | 182-182 |
| Ayedere<br>(DVIT2440.1)       | 299-317 | 294-294 | 243-245 | 249-249 | 179-189 | 247-254 | 235-235 | 192-192 | 77-77 | 147-167 | 133-135 | 164-190 | 147-151 | 206-214 | 353-353 | 230-234 | 256-263 | 147-151 | 174-174 |
| Ayedere<br>(DVIT2440.9)       | --      | --      | 243-247 | --      | 185-185 | --      | 235-245 | 165-165 | 77-79 | 147-147 | 133-135 | 186-188 | 139-151 | 206-210 | --      | 234-234 | 256-263 | 149-151 | 186-188 |
| Kara Kaltak<br>(2690Mtp1)     | 319-327 | 290-290 | 243-243 | 249-257 | 179-185 | 241-254 | 233-253 | 165-165 | 77-79 | 155-177 | 143-143 | 172-182 | 165-165 | 210-214 | 353-360 | 228-240 | 263-263 | 151-155 | 172-184 |
| Kara Kaytak<br>(DVIT2445.12)  | 328-328 | 294-294 | 233-243 | 247-247 | 179-179 | 247-254 | 259-261 | 165-165 | 79-79 | 147-147 | 139-141 | 202-202 | 139-139 | 204-218 | 368-368 | 234-234 | 256-256 | 151-151 | 188-188 |
| Kochtemyr<br>(DVIT2444.19)    | 319-319 | 294-294 | 243-276 | 255-255 | --      | 247-247 | 253-253 | 183-183 | 81-81 | 149-149 | 145-145 | 166-184 | 139-139 | 206-210 | 343-343 | --      | 256-263 | 151-151 | 174-190 |
| Uzuntakoy<br>(DVIT2447.4)     | 313-313 | 294-294 | 245-245 | 249-261 | 179-185 | 247-247 | 245-245 | 185-185 | 79-83 | 167-167 | 125-135 | 166-176 | 151-151 | 210-210 | 353-353 | 234-236 | 263-263 | 151-151 | 186-188 |
| Uzuntakoy<br>(DVIT2447.9)     | 313-319 | 294-294 | 233-245 | 261-271 | 179-185 | 247-247 | 245-247 | 185-185 | 79-79 | 167-173 | 133-141 | 176-202 | 139-139 | --      | 347-353 | 232-236 | 263-263 | 151-151 | 186-188 |
| Yuvankala<br>(DVIT2446.9)     | 315-319 | 290-290 | 233-245 | 247-249 | 185-189 | 247-247 | 249-249 | 165-173 | 77-83 | 149-155 | 149-153 | 170-188 | 165-165 | 208-210 | 353-353 | 232-234 | 263-263 | 147-149 | 192-196 |
| Yuvankala<br>(DVIT2446.12)    | 313-313 | 290-294 | 243-245 | 249-261 | 179-183 | 247-247 | 245-253 | 185-193 | 79-79 | 167-167 | 125-135 | 178-188 | 151-151 | 206-210 | 353-353 | 234-236 | 263-263 | 151-151 | 172-188 |
| O30-44<br>(DVIT1798)          | --      | --      | 235-235 | 253-271 | 179-179 | --      | 233-255 | 173-185 | 83-83 | 149-173 | 133-133 | 202-202 | 139-139 | 204-208 | 355-355 | 238-246 | 256-263 | 147-147 | 158-158 |
| O30-51<br>(DVIT1799)          | --      | 290-294 | 235-277 | 253-271 | 179-185 | --      | 233-255 | 173-185 | 81-83 | 149-173 | 133-133 | 202-202 | 139-139 | 204-208 | 355-355 | 238-246 | 256-263 | 147-147 | 158-178 |
| O30-53<br>(DVIT1800)          | --      | --      | 217-251 | 249-253 | 179-179 | 247-247 | 243-255 | 165-185 | 79-81 | 167-181 | 133-137 | 188-202 | 139-175 | 204-206 | 358-358 | 234-246 | 256-267 | 147-151 | 158-182 |
| O33-60<br>(DVIT1802)          | --      | 294-294 | 235-251 | 245-253 | 179-193 | --      | 243-253 | 165-173 | 79-79 | 159-181 | 133-137 | 177-177 | 139-179 | 204-210 | 353-353 | 234-234 | 256-267 | 147-151 | 178-186 |

|                                    |    |         |         |         |         |         |         |         |       |         |         |         |         |         |         |         |         |         |         |
|------------------------------------|----|---------|---------|---------|---------|---------|---------|---------|-------|---------|---------|---------|---------|---------|---------|---------|---------|---------|---------|
| O34-16<br>(DVIT1803)               | -- | 290-294 | 247-277 | 249-249 | 179-193 | --      | 247-255 | 165-185 | 81-81 | 149-159 | 133-133 | 178-178 | 139-175 | 204-208 | 353-353 | 228-246 | 263-267 | 147-151 | 174-178 |
| O34-29<br>(DVIT1804)               | -- | 294-294 | 235-277 | 247-249 | 185-193 | 241-247 | 243-247 | 165-183 | 79-83 | 173-181 | 133-133 | 177-177 | 139-175 | 204-218 | 355-360 | 234-246 | 256-263 | 147-147 | 158-186 |
| O34-46<br>(DVIT1805)               | -- | 288-294 | 234-253 | 253-261 | 183-190 | 241-254 | 239-263 | 171-183 | 77-77 | 149-149 | 141-147 | 177-206 | 139-147 | 206-206 | 353-371 | 228-238 | 256-267 | 151-151 | 176-182 |
| O34-54<br>(DVIT1806)               | -- | 294-294 | 234-251 | 251-261 | 175-190 | 247-254 | 239-263 | 165-183 | 77-83 | 149-149 | 141-141 | 177-206 | 139-147 | 206-206 | 368-371 | 228-236 | 256-263 | 149-151 | 182-190 |
| O34-55<br>(DVIT1807)               | -- | 288-290 | 234-253 | 251-261 | 175-183 | --      | 235-239 | 171-183 | 79-83 | 149-149 | 141-147 | 181-188 | 139-159 | 208-208 | 368-371 | 228-236 | 256-263 | 149-151 | 182-190 |
| O35-07<br>(DVIT1808)               | -- | --      | 253-253 | 251-261 | 190-190 | --      | 235-263 | 171-183 | 77-79 | 149-167 | 141-147 | 181-188 | 139-159 | 206-210 | 368-368 | 228-236 | 256-263 | 149-151 | 178-182 |
| O35-11<br>(DVIT1809)               | -- | --      | 253-253 | 253-261 | 183-190 | --      | 263-263 | --      | 77-79 | 149-149 | 141-147 | 177-206 | 147-159 | 206-210 | 357-368 | 228-228 | 256-267 | 149-151 | --      |
| O35-41<br>(DVIT1811)               | -- | --      | 235-247 | 247-249 | 189-194 | --      | 235-247 | 165-183 | 79-83 | 149-149 | 151-151 | 181-188 | 139-139 | 206-210 | 353-368 | 228-234 | 256-263 | 149-149 | 174-190 |
| O35-47<br>(DVIT1812)               | -- | 290-290 | 235-243 | 247-257 | 189-194 | 248-248 | 247-267 | 169-173 | 79-79 | 149-149 | 135-151 | 182-202 | 147-147 | 206-214 | 353-371 | 228-234 | 263-263 | 147-149 | --      |
| O35-50<br>(DVIT1813)               | -- | 290-290 | 243-247 | 247-249 | 189-194 | 241-248 | 235-235 | 165-183 | 79-83 | 149-149 | 147-151 | 181-202 | 139-147 | 206-210 | 353-371 | 234-236 | 263-263 | 147-149 | 174-190 |
| O35-64<br>(DVIT1816)               | -- | 290-290 | 243-243 | 237-257 | 185-185 | 254-254 | 249-249 | 165-167 | 77-77 | 149-149 | 131-151 | 166-188 | 141-175 | 202-210 | 345-353 | 234-249 | 263-271 | 147-151 | 158-194 |
| <i>sylvestris</i><br>(DVIT3355.4)  | -- | --      | 243-247 | 247-247 | 189-189 | --      | 235-263 | 167-183 | 81-83 | 155-177 | 137-143 | 181-186 | 165-177 | 214-214 | 343-343 | 236-238 | 256-263 | 149-151 | 180-194 |
| <i>sylvestris</i><br>(DVIT3355.5)  | -- | --      | 234-247 | 247-247 | 175-185 | 247-247 | 263-263 | 187-187 | 77-83 | 149-177 | 137-137 | 181-181 | 165-167 | 210-214 | 368-368 | 236-240 | 256-256 | 151-151 | 174-194 |
| <i>sylvestris</i><br>(DVIT3353.31) | -- | --      | 234-247 | 243-247 | 185-189 | 247-254 | 239-239 | 165-173 | 79-83 | 151-167 | 133-135 | 181-181 | 151-165 | 204-206 | 343-353 | 226-234 | 256-265 | 151-151 | 174-194 |
| <i>sylvestris</i><br>(DVIT3353.43) | -- | 288-288 | 234-257 | 243-271 | 183-185 | 248-248 | 235-263 | 165-165 | 83-83 | 151-167 | 135-143 | 178-181 | 163-165 | 210-214 | 353-368 | 228-232 | 263-265 | 149-151 | 180-180 |
| <i>sylvestris</i><br>(DVIT3350.25) | -- | 290-296 | 225-235 | 247-247 | 183-183 | 241-241 | 235-235 | 165-175 | 77-83 | 155-167 | 151-151 | 166-170 | 163-167 | 208-208 | 360-368 | 236-238 | 263-263 | 149-151 | 180-180 |
| <i>sylvestris</i><br>(DVIT3350.2)  | -- | 290-290 | 235-243 | 247-247 | 179-187 | 238-254 | 247-255 | 165-179 | 79-79 | 145-155 | 125-151 | 166-203 | 139-145 | 208-208 | 346-368 | 236-249 | 254-265 | 147-151 | 174-186 |

|                                    |         |         |         |         |         |         |         |         |       |         |         |         |         |         |         |         |         |         |         |
|------------------------------------|---------|---------|---------|---------|---------|---------|---------|---------|-------|---------|---------|---------|---------|---------|---------|---------|---------|---------|---------|
| <i>sylvestris</i><br>(DVIT3348.14) | --      | --      | 235-235 | 249-249 | --      | 241-241 | 249-257 | 171-171 | --    | 151-151 | --      | 174-174 | 139-167 | --      | 353-353 | 234-240 | 263-263 | --      | --      |
| <i>sylvestris</i><br>(DVIT3348.17) | --      | --      | 257-257 | 261-261 | 189-193 | 241-241 | 245-245 | 165-171 | 79-79 | 151-151 | 137-141 | 206-206 | 139-139 | 214-214 | 353-368 | 234-240 | 263-263 | 151-151 | 180-184 |
| <i>sylvestris</i><br>(DVIT3357.30) | --      | --      | 235-257 | 249-261 | 189-189 | --      | 245-249 | 165-171 | 77-77 | 151-151 | 141-141 | 174-174 | 167-167 | 206-214 | 368-368 | 234-234 | 263-263 | 147-149 | 180-180 |
| <i>sylvestris</i><br>(DVIT3357.4)  | --      | --      | --      | 261-261 | 189-193 | 246-246 | 245-245 | 165-171 | 77-79 | 151-151 | 137-141 | 174-174 | 139-167 | 214-214 | 353-353 | 234-240 | 263-263 | 149-151 | 180-180 |
| <i>sylvestris</i><br>(DVIT3351.23) | --      | --      | 233-253 | 257-261 | 181-181 | 241-247 | 239-249 | 165-165 | 77-79 | 151-151 | 137-145 | --      | 165-175 | 210-214 | 363-368 | 226-236 | 256-263 | 149-151 | 186-186 |
| <i>sylvestris</i><br>(DVIT3351.27) | --      | 288-294 | 253-275 | 249-261 | 179-181 | --      | 239-249 | 169-183 | 79-83 | 149-151 | 143-147 | --      | 163-163 | 210-214 | 363-368 | 228-236 | 263-263 | 149-151 | 186-186 |
| <i>sylvestris</i><br>(DVIT3349.12) | --      | 294-294 | 225-271 | 247-271 | 179-185 | 247-254 | 239-249 | 175-175 | 79-79 | 155-163 | 123-141 | 172-182 | 163-163 | 204-206 | 360-360 | 240-240 | 263-263 | 151-153 | 174-194 |
| <i>sylvestris</i><br>(DVIT3349.8)  | --      | --      | 247-271 | 247-247 | 183-183 | --      | 239-251 | 165-165 | 79-81 | 159-163 | 133-137 | 202-205 | 163-163 | --      | 360-368 | 240-245 | 263-265 | 149-153 | 182-184 |
| <i>sylvestris</i><br>(DVIT3356.38) | --      | --      | 247-247 | 247-255 | 189-189 | --      | 239-239 | 165-197 | 77-77 | 159-177 | 135-137 | 178-181 | 151-163 | 204-210 | 343-368 | 228-236 | 256-263 | 151-151 | 172-182 |
| <i>sylvestris</i><br>(DVIT3356.33) | --      | --      | 234-247 | 243-243 | 189-189 | --      | 239-239 | 167-167 | 77-83 | 159-167 | 133-135 | 181-202 | 163-163 | 204-214 | 353-368 | 236-236 | 256-263 | 151-151 | 182-194 |
| 545685 (PI#<br>545685)             | --      | 260-267 | 257-257 | --      | 191-191 | --      | --      | --      | --    | 139-145 | 145-149 | 188-202 | 147-147 | --      | --      | --      | --      | --      | --      |
| 597257.03 (GVIT<br>859)            | 297-297 | 310-324 | 247-255 | 239-245 | 185-189 | 243-247 | 239-241 | 167-167 | 77-77 | 139-159 | 133-141 | 148-192 | 161-165 | 216-221 | 328-347 | 246-246 | 261-263 | 147-169 | 172-176 |
| 588421.a (PI#<br>588421)           | 323-326 | 294-302 | 227-237 | 222-249 | 185-196 | 248-262 | 253-253 | 173-179 | 77-81 | 141-155 | 131-159 | 166-214 | 143-157 | 204-214 | 312-312 | 246-258 | 263-271 | 147-149 | 170-184 |
| 588422.a (PI#<br>588422)           | 311-315 | 288-300 | 227-245 | 230-237 | 183-185 | 247-254 | 229-247 | 165-165 | --    | 147-167 | 135-141 | 164-172 | 153-165 | 204-210 | 312-330 | 236-254 | 261-263 | 147-161 | 162-186 |
| 588451.c (GVIT<br>813)             | --      | --      | --      | 237-237 | --      | --      | --      | 167-167 | 79-79 | --      | --      | 182-182 | 171-171 | --      | --      | --      | 267-267 | --      | --      |
| 588452.b (GVIT<br>814)             | 309-309 | 302-304 | 245-245 | 222-239 | 183-187 | 247-251 | 243-243 | 167-187 | 81-81 | 169-169 | 139-143 | 180-180 | 153-157 | 206-208 | --      | 234-248 | 261-261 | 147-153 | 174-178 |
| 588650.a (PI#<br>588650)           | 313-325 | 294-296 | 217-235 | 235-235 | 181-181 | 254-254 | 247-261 | 165-169 | 77-81 | 155-159 | 139-149 | 166-186 | 141-165 | 204-210 | 368-384 | 236-236 | 261-261 | 147-149 | 174-186 |

|                                 |         |         |         |         |         |         |         |         |       |         |         |         |         |         |         |         |         |         |         |
|---------------------------------|---------|---------|---------|---------|---------|---------|---------|---------|-------|---------|---------|---------|---------|---------|---------|---------|---------|---------|---------|
| A-166-003 (PI# 597294)          | 317-323 | 302-302 | 237-247 | 228-237 | 193-198 | 248-258 | --      | 177-181 | 81-81 | --      | 131-131 | 196-204 | 149-149 | 204-204 | 327-336 | 242-248 | 261-261 | 147-147 | 172-172 |
| <i>amurensis</i> (DVIT1158.4)   | 301-317 | 298-304 | 243-243 | 243-243 | 183-197 | 252-256 | 241-245 | 167-167 | 81-81 | 153-155 | 129-129 | 166-184 | 167-171 | 204-214 | 329-329 | 234-236 | --      | 147-147 | 170-172 |
| <i>amurensis</i> (DVIT1157.12)  | 321-321 | 300-302 | 227-243 | 237-237 | 189-193 | 247-260 | 243-243 | 165-165 | --    | 145-145 | 137-145 | 184-184 | 155-167 | 204-204 | 329-337 | 234-234 | 261-261 | 145-147 | 170-170 |
| <i>amurensis</i> (DVIT1158.1)   | 321-321 | 300-302 | --      | 243-243 | 183-197 | 247-252 | 239-241 | 167-167 | 81-87 | 149-161 | 129-129 | 166-184 | 167-171 | 204-214 | 329-335 | 232-236 | 261-261 | 147-147 | 170-172 |
| <i>amurensis</i> (DVIT2006.1)   | 311-321 | 300-302 | 239-249 | 237-237 | 183-189 | 247-247 | 243-247 | 165-179 | --    | 149-149 | 125-133 | 172-184 | 157-165 | 206-208 | --      | 234-240 | 263-263 | 147-163 | 166-170 |
| <i>amurensis</i> (DVIT1156.2)   | 315-321 | 302-316 | 237-249 | 241-245 | 187-191 | 246-251 | 241-245 | 167-167 | 87-87 | 145-159 | 131-131 | 162-172 | 157-165 | 204-204 | 329-329 | 226-234 | 261-261 | 147-147 | 168-172 |
| <i>amurensis</i> (DVIT1157.2)   | 321-321 | 302-302 | --      | 237-237 | 194-205 | 247-247 | 241-241 | 167-167 | --    | 145-145 | 139-145 | 174-184 | 159-167 | 204-204 | --      | 226-234 | 261-261 | 145-147 | --      |
| <i>amurensis</i> (DVIT2005.5)   | 323-323 | 300-302 | 229-229 | 233-237 | 183-194 | 251-273 | 243-243 | 165-167 | 83-83 | 147-153 | 129-137 | 188-196 | 155-163 | 204-204 | 329-329 | 232-234 | 261-261 | 145-147 | 172-174 |
| B-166-016 (597298.01)           | 315-326 | 294-294 | 235-245 | 230-271 | 185-196 | 247-251 | 243-247 | 165-181 | 77-83 | 147-159 | 143-149 | 180-204 | 153-165 | 204-210 | 312-312 | 232-254 | 258-263 | 147-155 | 178-182 |
| B-166-019 (588715.01)           | 315-327 | 294-294 | 235-245 | 230-271 | 185-195 | 247-247 | 243-247 | 171-181 | 81-83 | 147-167 | 143-149 | 176-204 | 165-167 | 210-210 | 340-385 | 232-234 | 263-263 | 147-155 | 182-186 |
| Beaumont (DVIT1432)             | 323-329 | 284-308 | 233-239 | 236-236 | 187-215 | 225-225 | 247-249 | 171-185 | 79-79 | 147-151 | 135-135 | 202-202 | 143-143 | 204-204 | 348-360 | 252-252 | 254-254 | 149-161 | 198-198 |
| <i>betulifolia</i> (DVIT2596.1) | 297-299 | --      | 221-241 | 239-241 | 183-183 | --      | 239-239 | 167-167 | 77-77 | 155-155 | 131-137 | 154-174 | 151-155 | --      | 323-323 | 246-246 | 261-269 | 159-159 | 168-174 |
| C-166-025 (597296.01)           | 311-311 | --      | 233-245 | 231-247 | 185-194 | 247-247 | 241-243 | --      | 81-81 | 157-161 | 129-141 | 162-208 | 151-153 | 216-216 | 324-340 | 238-246 | 263-269 | 147-147 | 178-186 |
| C-166-026 (DVIT2550)            | 311-311 | --      | 233-243 | 231-247 | 185-189 | --      | 241-243 | 165-165 | 81-81 | 161-171 | 129-141 | 162-208 | 151-151 | 216-216 | 324-324 | 238-238 | 261-269 | 147-147 | 170-178 |
| C-166-039 (597297.01)           | --      | 297-298 | --      | --      | --      | 247-247 | 241-243 | --      | --    | 152-161 | 135-149 | 162-182 | --      | 212-216 | --      | 246-246 | 269-269 | 147-147 | 178-186 |
| C-166-043 (DVIT3192)            | 301-311 | 296-297 | 245-245 | 231-247 | 185-189 | 247-247 | 243-245 | 165-165 | --    | 151-151 | 129-135 | 162-168 | 151-153 | 212-216 | 324-324 | 238-246 | 261-263 | 147-147 | 178-178 |
| <i>coignetiae</i> (DVIT1159.10) | 317-319 | 300-302 | 233-247 | 237-253 | 183-187 | 247-251 | 243-243 | 167-181 | 89-89 | 147-159 | 133-133 | 186-188 | 147-157 | 212-214 | 345-345 | 234-240 | 267-269 | 146-153 | 166-184 |

|                                      |         |         |         |         |         |         |         |         |       |         |         |         |         |         |         |         |         |         |         |
|--------------------------------------|---------|---------|---------|---------|---------|---------|---------|---------|-------|---------|---------|---------|---------|---------|---------|---------|---------|---------|---------|
| <i>coignetiae</i><br>(DVIT1159.3)    | 317-319 | 282-300 | 233-255 | 237-253 | 181-183 | 247-251 | 243-243 | 179-189 | 89-89 | 149-151 | 133-133 | 180-180 | 147-175 | 204-206 | 341-346 | 234-234 | 261-269 | 146-146 | 178-184 |
| <i>coignetiae</i><br>(DVIT1159.9)    | 317-321 | 302-304 | 237-245 | 237-243 | 189-199 | 247-252 | 239-241 | 167-169 | 81-87 | 149-155 | 129-129 | 164-184 | 167-171 | 204-214 | 329-329 | 234-234 | 261-261 | 146-146 | 170-170 |
| <i>ficifolia</i><br>(DVIT2008.5)     | 293-326 | 304-312 | 229-241 | 241-241 | 203-203 | 247-247 | 241-241 | 169-181 | 85-85 | 157-157 | 141-143 | 164-208 | 151-167 | 204-204 | 322-322 | 244-246 | 263-267 | 145-147 | 166-166 |
| <i>ficifolia</i><br>(DVIT2008.7)     | 293-293 | 308-312 | 227-229 | 241-241 | 194-197 | 247-247 | 241-241 | 169-179 | 85-85 | 153-157 | 141-143 | 182-184 | 167-167 | 204-218 | 322-322 | 244-244 | 263-267 | 147-147 | 166-166 |
| <i>ficifolia</i><br>(DVIT1160.7)     | 293-293 | 304-308 | 227-227 | 241-241 | 191-194 | 246-246 | 243-243 | 179-181 | 85-85 | 153-153 | 135-143 | 182-182 | 167-167 | 204-204 | 322-322 | 244-244 | 265-267 | 149-151 | 166-186 |
| <i>flexuosa</i><br>(DVIT1385)        | 307-327 | 290-300 | 237-249 | 243-243 | 183-209 | --      | 255-261 | 167-171 | 79-79 | 145-151 | 133-141 | 174-196 | 143-153 | 204-208 | 361-361 | 244-250 | --      | 147-155 | 174-194 |
| J-167-048<br>(597295.01)             | 303-326 | 302-302 | 233-245 | 237-247 | 196-198 | 248-248 | 239-255 | 167-177 | 83-83 | 152-152 | 131-141 | 196-224 | 170-176 | 200-200 | --      | 250-252 | 263-263 | 145-145 | --      |
| <i>jacquemontii</i><br>(DVIT2349.13) | 289-319 | 294-294 | 235-235 | 245-245 | 185-187 | 241-254 | 241-249 | 169-175 | 79-79 | 155-155 | 131-135 | 164-164 | 141-165 | 204-214 | 347-353 | 236-236 | 267-267 | 149-149 | 170-172 |
| <i>jacquemontii</i><br>(DVIT2350.17) | --      | 294-294 | --      | --      | 185-187 | 254-254 | 241-241 | 169-175 | --    | 155-155 | 135-135 | 164-188 | --      | 214-214 | --      | 236-236 | 263-263 | 147-149 | 170-172 |
| <i>jacquemontii</i><br>(DVIT2354.7)  | 289-319 | 294-294 | 235-235 | 245-251 | 185-187 | 241-241 | 241-249 | 169-175 | 79-79 | 149-155 | 131-135 | 164-188 | 141-141 | 204-214 | 347-347 | 236-248 | 263-267 | 147-149 | 170-172 |
| <i>jacquemontii</i><br>(DVIT2355.11) | 289-319 | 294-294 | 235-235 | 245-251 | 185-187 | 241-254 | 241-249 | 169-169 | 79-79 | 149-149 | 131-135 | 164-188 | 165-165 | 214-214 | 347-353 | 236-236 | 263-263 | 147-147 | 170-172 |
| Kali Dakh II<br>(DVIT2539)           | 289-309 | 290-290 | 233-233 | 251-255 | 185-189 | 241-247 | 249-249 | 165-165 | 77-77 | 155-173 | 137-151 | 158-202 | 165-165 | 204-214 | 347-361 | 226-250 | 267-273 | 149-151 | 172-172 |
| O35-59<br>(DVIT1815)                 | 289-289 | 290-290 | 229-229 | 247-247 | 185-187 | 254-254 | 251-255 | 169-175 | --    | 149-149 | 131-141 | 162-166 | 141-157 | 200-204 | 344-344 | 248-250 | 263-271 | 147-147 | 166-166 |
| <i>piasezkii</i><br>(DVIT2027)       | 297-297 | 324-238 | 247-255 | 239-245 | 183-185 | 243-247 | 239-241 | 167-167 | 81-81 | 139-159 | 131-133 | 148-192 | 161-165 | 206-228 | --      | 246-248 | 261-269 | 147-147 | 172-176 |
| <i>piasezkii</i><br>(DVIT2032)       | 295-299 | 312-318 | 231-241 | 241-241 | 183-185 | 245-247 | 225-239 | 165-171 | 77-81 | 139-151 | 151-153 | 180-182 | 165-167 | 216-220 | 322-328 | 244-246 | 261-271 | 147-171 | 168-168 |
| Thomas<br>(DVIT1772)                 | 321-321 | 280-280 | 211-227 | 247-247 | 211-215 | 239-239 | 235-237 | --      | --    | 137-149 | 145-153 | 192-202 | --      | 233-233 | 328-345 | 230-238 | 261-263 | 147-147 | --      |
| Trayshed<br>(DVIT1756)               | --      | --      | 217-235 | 247-247 | 209-215 | --      | 237-245 | 183-187 | --    | --      | 145-147 | 182-192 | --      | 254-254 | 331-331 | 240-240 | 263-263 | 147-147 | 186-186 |

|                                              |         |         |         |         |         |         |         |         |       |         |         |         |         |         |         |         |         |         |         |
|----------------------------------------------|---------|---------|---------|---------|---------|---------|---------|---------|-------|---------|---------|---------|---------|---------|---------|---------|---------|---------|---------|
| Aurore (S. 5279)<br>(DVIT3009)               | 319-319 | 284-290 | 243-257 | 236-236 | 181-185 | 241-254 | 243-257 | 179-179 | 79-83 | 151-159 | 135-145 | 180-186 | 157-157 | 204-206 | 329-333 | 226-250 | 254-254 | 147-151 | 180-190 |
| Baco blanc (Baco<br>22A) (0000-0-289-<br>04) | 307-321 | 294-296 | 243-257 | 249-271 | 181-187 | 238-247 | 235-239 | 169-179 | 79-83 | 159-161 | 125-133 | 172-172 | 161-163 | 204-206 | 346-360 | 226-226 | 263-263 | 147-149 | 174-184 |
| Chambourcin (JS<br>26.205) (C 67-00)         | 315-319 | 284-290 | 251-257 | 239-249 | 185-189 | -:-     | 239-251 | 171-171 | 79-83 | 147-159 | 133-145 | 164-186 | 147-161 | 206-214 | 333-360 | 238-244 | 254-254 | 145-147 | 174-196 |
| Couderc 13<br>(GVIT0342)                     | -:-     | 290-290 | 261-281 | 239-255 | 187-187 | -:-     | 237-239 | -:-     | 83-83 | -:-     | 143-155 | 182-192 | 167-167 | 204-208 | 336-360 | 226-260 | -:-     | 147-149 | 180-186 |
| De Chaunac (Seibel<br>9549) (DVIT0257)       | 319-319 | 284-290 | 241-247 | 255-255 | 181-187 | 247-262 | 251-261 | 165-171 | 79-83 | 147-159 | 133-133 | 164-214 | 157-167 | 202-206 | 347-357 | 252-262 | 254-265 | 145-151 | 174-180 |
| Jaeger 70<br>(DVIT0196)                      | 307-315 | 288-304 | 227-237 | 251-251 | 186-189 | 218-254 | 249-255 | 171-181 | 83-83 | 159-161 | 125-151 | 178-178 | 161-163 | 204-214 | 360-360 | 228-268 | 254-263 | 145-149 | 174-198 |
| Joannès Seyve<br>23416 (6039Mtp1)            | -:-     | -:-     | -:-     | -:-     | -:-     | -:-     | -:-     | -:-     | -:-   | -:-     | -:-     | -:-     | -:-     | -:-     | -:-     | -:-     | -:-     | -:-     | -:-     |
| JS23-416<br>(DVIT0197)                       | 319-319 | 290-290 | 227-257 | 255-271 | 185-189 | 241-241 | 235-261 | 165-179 | 77-79 | 147-159 | 133-139 | 164-180 | 147-147 | 204-206 | -:-     | 226-234 | 254-265 | 145-155 | 178-184 |
| Kuhlmann 188-2<br>(DVIT0214)                 | 315-319 | 294-296 | 235-237 | 255-255 | 181-181 | -:-     | 251-255 | 165-167 | 77-79 | 157-167 | 135-141 | 164-164 | 165-167 | 204-204 | 334-360 | 226-232 | 263-263 | 147-147 | 174-178 |
| Sev Lernatu PRG<br>2224 (DVIT2685)           | 315-325 | 290-294 | 243-243 | 239-271 | 194-194 | 241-241 | 239-247 | 171-171 | 83-83 | 167-177 | 133-155 | 174-206 | 163-165 | 206-215 | 364-368 | 236-240 | 256-263 | -:-     | 172-178 |
| SV 12.375 Villard<br>blanc (HOP W11-<br>13)  | -:-     | 290-306 | 233-235 | 239-255 | 181-189 | 226-254 | 237-251 | 171-183 | 77-79 | 147-159 | 133-143 | 174-182 | 147-147 | 206-210 | 333-368 | 232-236 | 254-265 | 147-149 | 174-178 |
| Vignoles<br>(DVIT2741)                       | 319-327 | 290-298 | 237-259 | 249-249 | 185-185 | 241-247 | 239-251 | 165-171 | 79-79 | 147-159 | 125-149 | 182-186 | 161-165 | 206-214 | 329-329 | 226-246 | 254-254 | 149-155 | 174-192 |
