# Supplementary material for: Identification of mildew resistance in wild and cultivated Central Asian grape germplasm
Source: PubMed Central journal article supplement (PMC3851849; doi:10.1186/1471-2229-13-149), 2013-10-04
Supplement: 1471-2229-13-149-S4.pdf [file 1471-2229-13-149-S4.pdf]

**Supplementary Table S4.** List of SSR markers and allele size ranges.

| SSR marker   | Chromosome | Dye   | Alleles size range in base pairs |
|--------------|------------|-------|----------------------------------|
| VVIp60       | 1          | Hex   | 289 - 338                        |
| VVIb01       | 2          | 6-Fam | 260 - 324                        |
| VVMD28       | 3          | 6-Fam | 211 - 270                        |
| VVMD32       | 4          | 6-Fam | 222 - 273                        |
| VMC4c6       | 5          | Ned   | 142 - 174                        |
| VrZAG79      | 5          | 6-Fam | 234 - 287                        |
| VVMD27       | 5          | Ned   | 175 - 215                        |
| VMC2g2       | 6          | 6-Fam | 115 - 149                        |
| VVMD21       | 6          | Hex   | 218 - 273                        |
| VrZAG62      | 7          | Hex   | 175 - 223                        |
| VVMD31       | 7          | 6-Fam | 179 - 238                        |
| VVMD7        | 7          | Ned   | 225 - 267                        |
| VMC1b11      | 8          | Hex   | 156 - 197                        |
| VVIq52       | 9          | 6-Fam | 75 - 89                          |
| VVIv37       | 10         | 6-Fam | 137 - 181                        |
| VVMD25       | 11         | Ned   | 234 - 275                        |
| VVS02        | 11         | 6-Fam | 123 - 167                        |
| VMC4f3.1     | 12         | Hex   | 148 - 224                        |
| VMC8g9       | 12         | Hex   | 137 - 202                        |
| VVIh54       | 13         | 6-Fam | 129 - 187                        |
| VMCNg4e10.1  | 13         | Ned   | 200 - 291                        |
| sc47-18      | 13         | Ned   | 203 - 249                        |
| SC8-0071-014 | 13         | Ned   | 135 - 205                        |
| UDV124       | 13         | 6-Fam | 174 - 278                        |
| VMC3d12      | 13         | 6-Fam | 183 - 262                        |
| VVMD24       | 14         | Ned   | 200 - 254                        |
| VVIv67       | 15         | Hex   | 312 - 397                        |
| VVMD5        | 16         | 6-Fam | 222 - 268                        |
| VVIn73       | 17         | 6-Fam | 254 - 273                        |
| UDV108       | 18         | Hex   | 200 - 282                        |
| VMC7f2       | 18         | Hex   | 185 - 241                        |
| VVIn16       | 18         | 6-Fam | 145 - 171                        |
| VMC2g6       | 18         | 6-Fam | 125 - 141                        |
| VVIp31       | 19         | 6-Fam | 158 - 204                        |
