# Supplementary material for: Identification of mildew resistance in wild and cultivated Central Asian grape germplasm
Source: PubMed Central journal article supplement (PMC3851849; doi:10.1186/1471-2229-13-149), 2013-10-04
Supplement: 1471-2229-13-149-S5.pdf [file 1471-2229-13-149-S5.pdf]

**Supplementary Table S5.** SSR allele data with four markers linked to the *Ren1* locus. Alleles associated with powdery mildew resistance are in bold. Two previously identified and 10 newly identified powdery mildew resistant accessions are underlined. Missing data are indicated with a hyphen.

| Variety name and #id           | VMCNg4e10.1     | sc47-18         | SC08-0071-014   | UDV124          |
|--------------------------------|-----------------|-----------------|-----------------|-----------------|
| 588421.a (PI# 588421)          | 239-271         | 219-221         | <b>143</b> -147 | 226-234         |
| 588650.a (588650)              | 266-291         | 237-237         | 161-161         | 200- <b>216</b> |
| A Kalatchel (2076Mtp1)         | 236-257         | 231- <b>249</b> | 159-173         | 208-218         |
| A'asemi S1 (1979-0-2219-S1)    | 251-286         | 229-240         | 157-169         | <b>216</b> -218 |
| Ag Kiourdach p.e. (2842Mtp1)   | 254-263         | 241- <b>249</b> | 159-161         | 188-194         |
| Agaday (TYR VI 10-05)          | 254- <b>260</b> | <b>249-249</b>  | -:-             | 188-214         |
| Ahmeh Sal apyrène (2982Mtp1)   | 251-277         | 236-240         | 159-199         | <b>216</b> -220 |
| Alia boka (2858Mtp1)           | 251- <b>260</b> | 216- <b>249</b> | 169-173         | 198-212         |
| Alloued Zeine (DVIT0337)       | 251-257         | 240- <b>249</b> | 157-169         | 212-218         |
| <i>amurensis</i> (DVIT1157.12) | <b>260</b> -271 | 222-226         | 141-164         | 176-190         |
| <i>amurensis</i> (DVIT2006.1)  | <b>260-260</b>  | 216-225         | 147-163         | 190-191         |
| <i>amurensis</i> (DVIT1156.2)  | 266-269         | 221- <b>249</b> | 141-164         | 189-192         |
| <i>amurensis</i> (DVIT1157.2)  | <b>260</b> -271 | -:-             | 141-164         | 176-190         |
| Aragatzi (2113Mtp1)            | <b>260</b> -277 | 236- <b>249</b> | 169-199         | 220-220         |
| Arybata (DVIT2442.6)           | 251-251         | 242-242         | 169-169         | 208- <b>216</b> |
| Asgari 01 (2001-9-8093-01)     | 236-251         | 231-240         | 157-159         | <b>216</b> -218 |
| Askari (DVIT0343)              | 257-289         | 231-231         | 159-169         | <b>216</b> -230 |
| B-166-016 (597298.01)          | 271-289         | 231-233         | 161-169         | 200- <b>216</b> |
| Baharat Early (DVIT2306)       | 239-289         | 222-231         | 169-169         | <b>216</b> -230 |
| Baidh Ul Haman (DVIT0358)      | 236- <b>260</b> | 242- <b>249</b> | 159-169         | 212- <b>216</b> |
| Bargoon (DVIT2499)             | 254- <b>260</b> | <b>249-249</b>  | 161-169         | 188-212         |
| Bayad1 (749Mtp1)               | -:-             | 227-231         | 159-165         | <b>216</b> -218 |
| Berurargoon (DVIT2501)         | 251-254         | 242- <b>249</b> | 161-165         | <b>216</b> -220 |
| Black Kishmish (DVIT2055)      | <b>260</b> -277 | 236-240         | 157-199         | 218-220         |
| Bouaki nor (2507Mtp1)          | 239- <b>260</b> | 241- <b>249</b> | 159-169         | 198-212         |
| Boyalsing I (DVIT2496)         | 251-257         | 216- <b>249</b> | 159-173         | 218-230         |
| C-166-039 (597297.01)          | <b>260</b> -263 | -:-             | 166-178         | 194-194         |
| C-166-043 (DVIT3192)           | 263-263         | 217-217         | <b>143</b> -177 | 192-194         |
| Chaani noir (2676Mtp1)         | 251-254         | 240- <b>249</b> | 159-161         | 188- <b>216</b> |

|                                  |                 |                 |                 |                 |
|----------------------------------|-----------------|-----------------|-----------------|-----------------|
| Chamo (DVIT2730)                 | 254-254         | 242- <b>249</b> | 161-161         | 190-190         |
| <u>Chirai obak (1186Mtp1)</u>    | <u>254-260</u>  | <u>227-249</u>  | <u>143-175</u>  | <u>216-228</u>  |
| Cirmisi Sap De Sudak (DVIT0313)  | 251-277         | 236-240         | 159-199         | 190- <b>216</b> |
| Dais-el-anz (DVIT0569)           | 236- <b>260</b> | 231- <b>249</b> | 159-169         | 212-218         |
| DK #05 (Turkmn 13362)            | 251-257         | 216- <b>249</b> | 169-173         | 212-212         |
| DK Melkii Chernyi (Turkmn 13375) | 251-257         | 216- <b>249</b> | 169-173         | 198-220         |
| Dschan Im Isium (DVIT0315)       | 239-251         | 240-240         | 159-159         | 194- <b>216</b> |
| Fayoumi (DVIT2636)               | 236-251         | -:-             | 159-159         | <b>216</b> -218 |
| Gaschochi (DVIT2537)             | 248-254         | 222- <b>249</b> | 159-173         | 218-230         |
| Gechi Kyrilen (Turkmn 3028)      | 236-271         | 215-231         | 159-159         | <b>216</b> -218 |
| Guzal Kara (TYR VI 13-09)        | 251- <b>260</b> | 241- <b>249</b> | 162-169         | 212-212         |
| Henab (DVIT0417)                 | 236-251         | 231-240         | 157-173         | 198- <b>216</b> |
| Hisakasy (DVIT0759)              | 236-248         | 231- <b>249</b> | 159-161         | 188-218         |
| Hosargoon (DVIT2503)             | 254- <b>260</b> | 242- <b>249</b> | 169-169         | 190-212         |
| Huseine Rozvoj (TYR VI 13-15)    | -:-             | 241- <b>249</b> | 159-169         | 198-212         |
| <u>Husseine (DVIT0576)</u>       | <u>251-260</u>  | <u>242-249</u>  | <u>143-167</u>  | <u>216-220</u>  |
| Irki (1752Mtp1)                  | 251-254         | -:-             | 157-165         | <b>216-216</b>  |
| JS23-416 (DVIT0197)              | 227-236         | 220-231         | 159-163         | <b>216</b> -218 |
| Kabuli (DVIT2497)                | 251-254         | 207- <b>249</b> | 159-165         | 208-218         |
| Kali Dakh II (DVIT2539)          | 248-254         | 227- <b>249</b> | 159-161         | 188-218         |
| Kara Dzhidzhigi (DVIT2322)       | 251- <b>260</b> | 216-240         | 157-173         | 198-218         |
| Kara Kaytak (DVIT2445.12)        | 251-257         | <b>249-249</b>  | 169-169         | 230-232         |
| Kara Palvan (2780Mtp1)           | 239-271         | 215- <b>249</b> | 159-169         | 198-218         |
| <u>Karadzhandal (DVIT2323)</u>   | <u>254-260</u>  | <u>227-249</u>  | <u>143-175</u>  | <u>216-220</u>  |
| Kashiri (DVIT2451)               | 248-254         | 216- <b>249</b> | 159-173         | 198-218         |
| Katta Kurgan (DVIT0774)          | 251- <b>260</b> | 242- <b>249</b> | 165-169         | 212-222         |
| <u>Khalchili (DVIT0431)</u>      | <u>260-271</u>  | <u>215-249</u>  | <u>143-159</u>  | <u>212-218</u>  |
| Khatmi (2190Mtp1)                | 254-271         | 215- <b>249</b> | 159-161         | 188-198         |
| Khawngi (DVIT2919)               | 227-254         | 203- <b>249</b> | <b>143</b> -161 | 228-232         |
| Khorestini (DVIT <b>2605</b> )   | 236- <b>260</b> | 231- <b>249</b> | 159-169         | 212-218         |

|                                      |                 |                 |                |                |
|--------------------------------------|-----------------|-----------------|----------------|----------------|
| Kibraiski (2781Mtp1)                 | <b>260-266</b>  | 232-240         | 157-159        | 190-218        |
| Kichmich rond (1678Mtp5)             | 257-277         | 236- <b>249</b> | 169-199        | 198-220        |
| Kishmish Sorkh (DVIT0437)            | 236-271         | 215-231         | 159-159        | <b>216-218</b> |
| Kisil izium (0Mtp589)                | 236- <b>260</b> | 231- <b>249</b> | 159-169        | 218-230        |
| <u>Kismish Vatkana (20008-14 B)</u>  | <u>236-260</u>  | <u>231-249</u>  | <u>143-159</u> | <u>216-218</u> |
| Kouldjinski (DVIT2680)               | 236-239         | 231- <b>249</b> | 159-169        | 198-218        |
| Koz ouzioum (2635Mtp1)               | 236-254         | 231- <b>249</b> | 159-161        | -:-            |
| Kule Dary (DVIT1070)                 | 236-254         | 231-239         | 159-175        | <b>216-218</b> |
| Kush Dzhumurtka (Turkmn 18820)       | 236-257         | 231- <b>249</b> | 159-169        | 194-218        |
| Lal Sorkh (DVIT0442)                 | <b>260-277</b>  | 236- <b>249</b> | 169-199        | 212-220        |
| <u>Late Vavilov (ARM Q01-16)</u>     | <u>236-260</u>  | <u>231-249</u>  | <u>143-159</u> | <u>216-218</u> |
| Mamidon (Turkmn 3025)                | 257-271         | 215- <b>249</b> | 159-169        | 212-218        |
| Mamidon Deli (Turkmn 6984)           | 257-271         | 215- <b>249</b> | 159-169        | 212-218        |
| <u>Matrassa (2642Mtp2)</u>           | <u>248-251</u>  | <u>216-240</u>  | <u>143-173</u> | <u>198-216</u> |
| Mehdi 01 (2001-9-8101-01)            | 251-271         | -:-             | 159-159        | <b>216-218</b> |
| Mellei (Turkmn 3030)                 | 236-271         | 215-231         | 159-159        | <b>216-218</b> |
| Monaca (1742Mtp1)                    | 236-254         | 231- <b>249</b> | 159-161        | 194-218        |
| Mourvedre Famellestadt (DVIT0319)    | 254-257         | 215- <b>249</b> | 161-173        | <b>216-220</b> |
| Narma (2648Mtp2)                     | -:-             | 231- <b>249</b> | 159-161        | -:-            |
| Neeli (DVIT2514)                     | <b>260-271</b>  | 237- <b>249</b> | 163-169        | 192-218        |
| Nimrang (TYR VI 15-17)               | 236-239         | 231- <b>249</b> | 159-169        | 200-220        |
| Noir D'automne (DVIT0330)            | 251-254         | 216- <b>249</b> | 161-173        | 212-214        |
| <u>O34-16 (DVIT1803)</u>             | <u>260-271</u>  | <u>215-249</u>  | <u>143-159</u> | <u>216-218</u> |
| Pakistan Collection 25168 (DVIT2282) | 254- <b>260</b> | 216- <b>249</b> | 161-169        | 188-212        |
| Pakistan Collection 25180 (DVIT2269) | 254- <b>260</b> | -:-             | -:-            | 188-212        |
| Pakistan Collection 25237 (DVIT2272) | 257- <b>260</b> | <b>249-249</b>  | 169-169        | 212-214        |
| Pakistan Collection 25241 (DVIT2271) | 242- <b>260</b> | 217-229         | 169-173        | 212-232        |
| Pakistan Collection 25296            | 254-257         | 216- <b>249</b> | 159-169        | 214-218        |

|                                      |                       |                       |                |                       |
|--------------------------------------|-----------------------|-----------------------|----------------|-----------------------|
| (DVIT2283)                           |                       |                       |                |                       |
| Pakistan Collection 25311            | 251-257               | <b>249-249</b>        | 159-169        | 212-218               |
| (DVIT2264)                           |                       |                       |                |                       |
| Parargoon (DVIT2502)                 | 251- <b>260</b>       | 216- <b>249</b>       | 169-173        | 212-218               |
| Persian R27 (DVIT2755)               | 248-254               | <b>249-249</b>        | 161-161        | 202-228               |
| Pervenetz Praskoveisky<br>(2651Mtp2) | 245-263               | 221- <b>249</b>       | 162-169        | 208-212               |
| Précoce d'Astrakan (0Mtp928)         | 251-254               | 216- <b>249</b>       | -:-            | 198-198               |
| Rajoulan (0Mtp950)                   | 257-268               | 240- <b>249</b>       | -:-            | 212-220               |
| Razakiia piembiana (2737Mtp1)        | 251-283               | 215-240               | 159-159        | 214- <b>216</b>       |
| Red Ohanez (DVIT0499)                | 251-257               | 232- <b>249</b>       | 159-169        | 212- <b>216</b>       |
| Rhazaki (Pa 1882) (TYR VI 16-09)     | 251-257               | 232-240               | 159-159        | 194- <b>216</b>       |
| Rhazaki Anatolico (DVIT0608)         | 236-254               | 231-231               | 159-159        | <b>216-218</b>        |
| Rhazaki De Crete (DVIT0501)          | 251-257               | 232-240               | 159-159        | 194- <b>216</b>       |
| Rhazaki Mavro (DVIT0555)             | 266-283               | 215-232               | 159-159        | <b>216-218</b>        |
| Rish BabaHOP L04-19)                 | 254- <b>260</b>       | 227- <b>249</b>       | 169-175        | 212-220               |
| Rizamat (DVIT2338)                   | 251- <b>260</b>       | 216- <b>249</b>       | 169-173        | 198-212               |
| Sabza angur (0Mtp1007)               | 239- <b>260</b>       | 227-231               | 157-159        | 218-220               |
| Sary Kiriak (0Mtp1031)               | 257-257               | <b>249-249</b>        | 169-169        | 198-212               |
| Shahani 01 (2001-9-7097-01)          | 251-271               | 215-240               | 159-159        | <b>216-218</b>        |
| <u>Sochal (DVIT1126)</u>             | <u>239-<b>260</b></u> | <u>216-<b>249</b></u> | <u>143-173</u> | <u>198-<b>216</b></u> |
| <u>Soiaki (2657Mtp1)</u>             | <u>251-<b>260</b></u> | <u>216-<b>249</b></u> | <u>143-173</u> | <u>216-218</u>        |
| Soultani (0Mtp1071)                  | 236- <b>260</b>       | 231- <b>249</b>       | 159-169        | 218-218               |
| Sourkhak biely (2856Mtp1)            | <b>260-263</b>        | 240- <b>249</b>       | 157-169        | -:-                   |
| sylvestris (DVIT3353.43)             | 251-271               | 216-242               | 145-165        | 190- <b>216</b>       |
| sylvestris (DVIT3350.25)             | 251-254               | 216- <b>249</b>       | 161-173        | 198-228               |
| sylvestris (DVIT3350.2)              | 251-251               | 216-219               | 193-193        | <b>216-216</b>        |
| sylvestris (DVIT3351.23)             | <b>260-277</b>        | 216-236               | <b>143-199</b> | 198-198               |
| <u>sylvestris (DVIT3351.27)</u>      | <u>260-263</u>        | <u>216-242</u>        | <u>143-145</u> | <u>194-208</u>        |
| sylvestris (DVIT3349.12)             | 263-263               | 203-216               | <b>143-163</b> | 218-231               |
| Tagobi (2659Mtp1)                    | 239-271               | 231- <b>249</b>       | 159-159        | 198-218               |
| Taifi (DVIT2174)                     | 233-239               | 231- <b>249</b>       | 159-169        | 198-218               |

|                                      |                 |                 |                |                 |
|--------------------------------------|-----------------|-----------------|----------------|-----------------|
| Taka Sago (TYR VI 17-03)             | 242-283         | 215- <b>249</b> | 159-159        | 204-214         |
| Tarnau (TYR VI 17-07)                | 239-257         | <b>249-249</b>  | 169-169        | 198-198         |
| Tchatyrbac (664Mtp1)                 | 251-251         | 240-240         | 159-162        | 208- <b>216</b> |
| Thomas (DVIT1772)                    | <b>260-274</b>  | 216-221         | -:-            | 208-262         |
| Tolstokory (1985Mtp2)                | 254-263         | 242- <b>249</b> | 161-173        | 206-206         |
| Trayshed (DVIT1756)                  | <b>260-260</b>  | 215-215         | -:-            | 224-278         |
| Tufachi S1 (1985-0-2415-S1)          | 257-263         | 241- <b>249</b> | 159-169        | 194-212         |
| Tuia-tiche (2760Mtp1)                | 251-257         | 242- <b>249</b> | 167-169        | 198-220         |
| Uzbekistanian Muscat<br>(DVIT2072)   | <b>260-289</b>  | 231- <b>249</b> | 169-169        | 212-230         |
| Varuschkin (0Mtp1165)                | 251-254         | 216- <b>249</b> | 161-173        | 188-198         |
| <u>Vassarga tchernaia (2510Mtp1)</u> | <u>251-260</u>  | <u>231-249</u>  | <u>143-159</u> | <u>198-216</u>  |
| Volgo Don (TYR VI 17-17)             | 254- <b>260</b> | 232- <b>249</b> | 159-169        | 212-218         |
| Zerk (DVIT0606)                      | 251-271         | -:-             | 159-173        | <b>216-218</b>  |

---
