# Supplementary material for: Identification of mildew resistance in wild and cultivated Central Asian grape germplasm
Source: PubMed Central journal article supplement (PMC3851849; doi:10.1186/1471-2229-13-149), 2013-10-04
Supplement: 1471-2229-13-149-S6.pdf [file 1471-2229-13-149-S6.pdf]

**Supplementary Table S6.** List of accessions screened for powdery mildew resistance in a no-spray field nursery trial. Bold accessions were included as known resistant and susceptible controls. Newly identified powdery mildew resistant accessions are underlined. Powdery mildew symptoms were recorded on leaves and canes. Plants in group A were screened in 2009; plants in group B were screened in year 2010; plants in group C were screened in 2012. Group D accessions are maintained in the Vassal collection (INRA, France) – they were evaluated under unsprayed greenhouse evaluations.

|                | Accession name       | No. of replicates | Leaf |     |      |         | Cane    |     |     |      |         |         |
|----------------|----------------------|-------------------|------|-----|------|---------|---------|-----|-----|------|---------|---------|
|                |                      |                   | Min  | Max | Mean | Std Dev | Std Err | Min | Max | Mean | Std Dev | Std Err |
| <b>Group A</b> | 05389-01             | 7                 | 0    | 1   | 0.17 | 0.41    | 0.17    | 0   | 2   | 1.00 | 1.10    | 0.45    |
|                | 05389-02             | 6                 | 0    | 3   | 1.83 | 1.17    | 0.48    | 0   | 2   | 1.00 | 0.63    | 0.26    |
|                | 05391-01             | 8                 | 0    | 0   | 0.00 | 0.00    | 0.00    | 0   | 2   | 0.38 | 0.74    | 0.26    |
|                | 06715-105            | 7                 | 0    | 1   | 0.29 | 0.49    | 0.18    | 0   | 1   | 0.43 | 0.53    | 0.20    |
|                | 06715-159            | 9                 | 0    | 4   | 1.67 | 1.50    | 0.50    | 0   | 2   | 0.89 | 0.78    | 0.26    |
|                | 07358-14             | 11                | 1    | 5   | 3.09 | 1.30    | 0.39    | 1   | 5   | 2.73 | 1.27    | 0.38    |
|                | 07754-10             | 18                | 3    | 5   | 3.67 | 0.77    | 0.18    | 4   | 5   | 4.94 | 0.24    | 0.06    |
|                | 588422.a             | 8                 | 3    | 5   | 4.50 | 0.76    | 0.27    | 3   | 5   | 4.63 | 0.74    | 0.26    |
|                | 588452.b             | 4                 | 0    | 0   | 0.00 | 0.00    | 0.00    | 0   | 3   | 0.75 | 1.50    | 0.75    |
|                | <b>Agaday</b>        | 10                | 4    | 5   | 4.80 | 0.42    | 0.13    | 3   | 5   | 4.60 | 0.70    | 0.22    |
|                | <b>Asgari 01</b>     | 10                | 3    | 5   | 4.40 | 0.70    | 0.22    | 3   | 5   | 4.20 | 0.79    | 0.25    |
|                | <b>Askari</b>        | 8                 | 3    | 5   | 3.63 | 0.74    | 0.26    | 2   | 5   | 3.25 | 0.89    | 0.31    |
|                | <b>Aubun</b>         | 12                | 1    | 4   | 2.75 | 0.97    | 0.28    | 0   | 5   | 2.58 | 1.38    | 0.40    |
|                | B-166-019            | 8                 | 0    | 5   | 3.00 | 1.51    | 0.53    | 0   | 5   | 3.00 | 1.51    | 0.53    |
|                | <b>Baharat Early</b> | 6                 | 3    | 5   | 4.33 | 0.82    | 0.33    | 4   | 5   | 4.33 | 0.52    | 0.21    |

|                      |          |          |          |             |             |             |          |          |             |             |             |
|----------------------|----------|----------|----------|-------------|-------------|-------------|----------|----------|-------------|-------------|-------------|
| Bargoon              | 10       | 2        | 5        | 3.70        | 0.82        | 0.26        | 1        | 5        | 3.20        | 1.40        | 0.44        |
| Barrett 9            | 11       | 0        | 0        | 0.00        | 0.00        | 0.00        | 0        | 0        | 0.00        | 0.00        | 0.00        |
| Blanc Du Bois        | 11       | 0        | 1        | 0.27        | 0.47        | 0.14        | 0        | 1        | 0.55        | 0.52        | 0.16        |
| Beaumont             | 8        | 0        | 1        | 0.50        | 0.53        | 0.19        | 0        | 3        | 1.00        | 1.07        | 0.38        |
| Black Kishmish       | 10       | 4        | 5        | 4.50        | 0.53        | 0.17        | 4        | 5        | 4.20        | 0.42        | 0.13        |
| <b>Carignane</b>     | 14       | 3        | 5        | 4.57        | 0.65        | 0.17        | 2        | 5        | 4.50        | 0.94        | 0.25        |
| Cirmisi Sap De Sudak | 6        | 2        | 4        | 3.50        | 0.84        | 0.34        | 1        | 5        | 3.00        | 1.41        | 0.58        |
| Dais-el-anz          | 8        | 3        | 5        | 4.13        | 0.64        | 0.23        | 2        | 5        | 3.88        | 0.99        | 0.35        |
| <b>DC1-39</b>        | 12       | 0        | 1        | 0.08        | 0.29        | 0.08        | 0        | 0        | 0.00        | 0.00        | 0.00        |
| Dschan Im Isium      | 10       | 2        | 5        | 3.70        | 0.95        | 0.30        | 1        | 5        | 3.60        | 1.35        | 0.43        |
| Durif 01             | 10       | 0        | 4        | 2.70        | 1.34        | 0.42        | 1        | 4        | 2.70        | 0.82        | 0.26        |
| Fayoumi              | 10       | 1        | 4        | 3.30        | 1.06        | 0.33        | 2        | 4        | 3.50        | 0.71        | 0.22        |
| Guzal Kara           | 10       | 4        | 5        | 4.60        | 0.52        | 0.16        | 2        | 5        | 3.70        | 1.16        | 0.37        |
| Henab                | 4        | 4        | 5        | 4.75        | 0.50        | 0.25        | 4        | 5        | 4.25        | 0.50        | 0.25        |
| Hosargoon            | 10       | 2        | 5        | 4.00        | 1.05        | 0.33        | 3        | 5        | 3.90        | 0.74        | 0.23        |
| <i>Husseine</i>      | <u>9</u> | <u>0</u> | <u>2</u> | <u>1.11</u> | <u>0.93</u> | <u>0.31</u> | <u>0</u> | <u>3</u> | <u>1.33</u> | <u>1.00</u> | <u>0.33</u> |
| J-167-048            | 6        | 0        | 3        | 0.67        | 1.21        | 0.49        | 0        | 3        | 0.67        | 1.21        | 0.49        |
| Jane De Smirna       | 10       | 0        | 4        | 3.20        | 1.23        | 0.39        | 0        | 3        | 2.00        | 1.15        | 0.37        |
| JS23.416             | 10       | 0        | 1        | 0.10        | 0.32        | 0.10        | 0        | 1        | 0.20        | 0.42        | 0.13        |
| Kara Dzhidzhigi      | 9        | 4        | 5        | 4.89        | 0.33        | 0.11        | 0        | 5        | 4.00        | 1.66        | 0.55        |
| <b>Karadzhandal</b>  | 12       | 0        | 1        | 0.67        | 0.49        | 0.14        | 0        | 1        | 0.42        | 0.51        | 0.15        |
| Katta Kurgan         | 6        | 4        | 5        | 4.67        | 0.52        | 0.21        | 4        | 5        | 4.83        | 0.41        | 0.17        |

|                            |           |          |          |             |             |             |          |          |             |             |             |
|----------------------------|-----------|----------|----------|-------------|-------------|-------------|----------|----------|-------------|-------------|-------------|
| <i><u>Khalchili</u></i>    | <u>10</u> | <u>0</u> | <u>4</u> | <u>1.40</u> | <u>1.26</u> | <u>0.40</u> | <u>0</u> | <u>4</u> | <u>2.00</u> | <u>1.33</u> | <u>0.42</u> |
| Khorestini                 | 10        | 2        | 5        | 3.80        | 1.03        | 0.33        | 3        | 5        | 3.80        | 0.92        | 0.29        |
| Khusaine Red               | 10        | 2        | 5        | 4.30        | 0.95        | 0.30        | 3        | 5        | 4.10        | 0.88        | 0.28        |
| Kule Dary                  | 8         | 3        | 5        | 4.25        | 0.71        | 0.25        | 1        | 4        | 2.38        | 1.30        | 0.46        |
| Lal                        | 10        | 3        | 5        | 4.30        | 0.67        | 0.21        | 3        | 5        | 3.90        | 0.57        | 0.18        |
| Lal Sorkh                  | 6         | 4        | 5        | 4.50        | 0.55        | 0.22        | 4        | 5        | 4.17        | 0.41        | 0.17        |
| <i><u>Late Vavilov</u></i> | <u>12</u> | <u>0</u> | <u>3</u> | <u>1.08</u> | <u>0.79</u> | <u>0.23</u> | <u>1</u> | <u>4</u> | <u>2.42</u> | <u>0.79</u> | <u>0.23</u> |
| Mehdi 01                   | 8         | 2        | 5        | 4.50        | 1.07        | 0.38        | 4        | 5        | 4.88        | 0.35        | 0.13        |
| Neeli                      | 6         | 2        | 5        | 3.67        | 1.03        | 0.42        | 3        | 4        | 3.67        | 0.52        | 0.21        |
| Noir D'automne             | 10        | 2        | 5        | 3.80        | 1.03        | 0.33        | 0        | 5        | 3.20        | 1.99        | 0.63        |
| Paragoon                   | 8         | 4        | 5        | 4.50        | 0.53        | 0.19        | 4        | 5        | 4.88        | 0.35        | 0.13        |
| Pakistan Collection 25168  | 8         | 2        | 5        | 4.13        | 1.13        | 0.40        | 3        | 5        | 4.25        | 0.71        | 0.25        |
| Pakistan Collection 25180  | 10        | 3        | 5        | 4.00        | 0.94        | 0.30        | 2        | 5        | 3.90        | 0.99        | 0.31        |
| Pakistan Collection 25227  | 12        | 3        | 5        | 4.00        | 0.74        | 0.21        | 3        | 5        | 3.92        | 0.67        | 0.19        |
| Pakistan Collection 25234  | 12        | 3        | 5        | 4.42        | 0.67        | 0.19        | 1        | 5        | 4.25        | 1.22        | 0.35        |
| Pakistan Collection 25241  | 10        | 2        | 5        | 4.40        | 0.97        | 0.31        | 3        | 5        | 4.10        | 0.74        | 0.23        |
| Pakistan Collection 25296  | 8         | 1        | 5        | 3.00        | 1.31        | 0.46        | 3        | 5        | 4.00        | 0.76        | 0.27        |
| Red Ohanez                 | 8         | 4        | 5        | 4.38        | 0.52        | 0.18        | 3        | 5        | 4.38        | 0.74        | 0.26        |
| Rhazaki Anat.              | 10        | 2        | 5        | 4.10        | 1.10        | 0.35        | 0        | 5        | 2.80        | 1.69        | 0.53        |
| Rish Baba                  | 10        | 3        | 5        | 4.30        | 0.67        | 0.21        | 3        | 5        | 4.30        | 0.67        | 0.21        |
| Rizamat                    | 8         | 4        | 5        | 4.63        | 0.52        | 0.18        | 4        | 5        | 4.75        | 0.46        | 0.16        |
| Ruby Seedless              | 7         | 4        | 5        | 4.57        | 0.53        | 0.20        | 2        | 5        | 3.71        | 1.11        | 0.42        |

|                |                                    |           |          |          |             |             |             |          |          |             |             |             |
|----------------|------------------------------------|-----------|----------|----------|-------------|-------------|-------------|----------|----------|-------------|-------------|-------------|
|                | Shahani 01                         | 10        | 4        | 5        | 4.80        | 0.42        | 0.13        | 2        | 5        | 4.40        | 0.97        | 0.31        |
|                | <i>Sochal</i>                      | <u>12</u> | <u>1</u> | <u>3</u> | <u>2.42</u> | <u>0.67</u> | <u>0.19</u> | <u>0</u> | <u>3</u> | <u>0.83</u> | <u>0.94</u> | <u>0.27</u> |
|                | Vignoles                           | 10        | 0        | 1        | 0.20        | 0.42        | 0.13        | 0        | 1        | 0.20        | 0.42        | 0.13        |
|                | <b>Villard blanc</b>               | 11        | 0        | 2        | 0.45        | 0.82        | 0.25        | 0        | 4        | 2.14        | 1.27        | 0.38        |
|                | Volgo Don                          | 11        | 3        | 5        | 4.36        | 0.67        | 0.20        | 3        | 5        | 4.45        | 0.82        | 0.25        |
|                | Zerk                               | 10        | 5        | 5        | 5.00        | 0.00        | 0.00        | 4        | 5        | 4.80        | 0.42        | 0.13        |
| <b>Group B</b> | 545685                             | 10        | 0        | 0        | 0.00        | 0.00        | 0.00        | 0        | 0        | 0.00        | 0.00        | 0.00        |
|                | 588421.a                           | 10        | 4        | 5        | 4.70        | 0.48        | 0.15        | 0        | 5        | 1.40        | 1.78        | 0.56        |
|                | 588650.a                           | 10        | 4        | 5        | 4.50        | 0.53        | 0.17        | 0        | 5        | 2.20        | 2.35        | 0.74        |
|                | A-166-003                          | 10        | 3        | 5        | 4.50        | 0.85        | 0.27        | 0        | 5        | 2.10        | 2.28        | 0.72        |
|                | <b>Agaday</b>                      | 10        | 5        | 5        | 5.00        | 0.00        | 0.00        | 0        | 5        | 2.40        | 2.17        | 0.69        |
|                | <b>Asgari 01</b>                   | 10        | 4        | 5        | 4.90        | 0.32        | 0.10        | 0        | 5        | 2.20        | 2.25        | 0.71        |
|                | <b>Askari</b>                      | 10        | 4        | 5        | 4.30        | 0.48        | 0.15        | 0        | 5        | 2.70        | 2.36        | 0.75        |
|                | <b>Aubun</b>                       | 6         | 3        | 5        | 4.17        | 0.75        | 0.31        | 0        | 4        | 1.83        | 2.04        | 0.83        |
|                | B-166-016                          | 10        | 4        | 5        | 4.80        | 0.42        | 0.13        | 0        | 5        | 2.00        | 2.26        | 0.71        |
|                | <b>Baharat Early</b>               | 10        | 3        | 5        | 4.10        | 0.74        | 0.23        | 0        | 4        | 1.90        | 1.85        | 0.59        |
|                | Baidh Ul Haman                     | 10        | 5        | 5        | 5.00        | 0.00        | 0.00        | 0        | 5        | 2.10        | 2.23        | 0.71        |
|                | Black Kishmis (DVIT0358)           | 10        | 4        | 5        | 4.90        | 0.32        | 0.10        | 0        | 4        | 1.90        | 2.02        | 0.64        |
|                | C-166-043                          | 10        | 0        | 1        | 0.10        | 0.32        | 0.10        | 0        | 2        | 0.55        | 0.83        | 0.26        |
|                | <b>Carignane</b>                   | 10        | 3        | 5        | 4.70        | 0.67        | 0.21        | 0        | 5        | 3.40        | 1.58        | 0.50        |
|                | <b>DC1-39</b>                      | 10        | 0        | 1        | 0.20        | 0.42        | 0.13        | 0        | 0        | 0.00        | 0.00        | 0.00        |
|                | DVIT1158.1 ( <i>V. amurensis</i> ) | 10        | 0        | 5        | 3.00        | 1.63        | 0.52        | 0        | 5        | 1.70        | 2.06        | 0.65        |

|                                        |    |   |   |      |      |      |   |   |      |      |      |
|----------------------------------------|----|---|---|------|------|------|---|---|------|------|------|
| DVIT1158.4 ( <i>V. amurensis</i> )     | 2  | 3 | 5 | 4.00 | 1.41 | 1.00 | 0 | 3 | 1.50 | 2.12 | 1.50 |
| DVIT1159.10 ( <i>V. amurensis</i> )    | 10 | 2 | 5 | 4.40 | 0.97 | 0.31 | 0 | 4 | 1.00 | 1.63 | 0.52 |
| DVIT2006.1 ( <i>V. amurensis</i> )     | 3  | 0 | 5 | 3.00 | 2.65 | 1.53 | 0 | 3 | 1.00 | 1.73 | 1.00 |
| DVIT1159.3 ( <i>V. coignetiae</i> )    | 4  | 1 | 5 | 3.25 | 1.71 | 0.85 | 0 | 3 | 0.75 | 1.50 | 0.75 |
| DVIT1160.7 ( <i>V. ficifolia</i> )     | 10 | 0 | 5 | 3.40 | 1.35 | 0.43 | 0 | 4 | 1.10 | 1.79 | 0.57 |
| DVIT2008.5 ( <i>V. ficifolia</i> )     | 10 | 3 | 5 | 4.30 | 0.67 | 0.21 | 0 | 5 | 1.10 | 1.85 | 0.59 |
| DVIT2008.7 ( <i>V. ficifolia</i> )     | 10 | 3 | 5 | 4.30 | 0.67 | 0.21 | 0 | 5 | 1.30 | 1.95 | 0.62 |
| <i>V. flexuosa</i>                     | 10 | 0 | 4 | 2.90 | 1.20 | 0.38 | 0 | 4 | 1.50 | 1.65 | 0.52 |
| <i>V. piasezkii</i> (DVIT2032)         | 10 | 0 | 3 | 1.40 | 1.26 | 0.40 | 0 | 1 | 0.10 | 0.32 | 0.10 |
| DVIT2350.17 ( <i>V. jacquemontii</i> ) | 10 | 4 | 5 | 4.50 | 0.53 | 0.17 | 0 | 5 | 2.20 | 2.15 | 0.68 |
| DVIT2354.7 ( <i>V. jacquemontii</i> )  | 10 | 4 | 5 | 4.70 | 0.48 | 0.15 | 0 | 4 | 1.60 | 1.78 | 0.56 |
| DVIT2355.11 ( <i>V. jacquemontii</i> ) | 10 | 4 | 5 | 4.80 | 0.42 | 0.13 | 0 | 5 | 2.20 | 1.99 | 0.63 |
| Grignolino                             | 10 | 4 | 5 | 4.70 | 0.48 | 0.15 | 0 | 5 | 1.70 | 1.83 | 0.58 |
| Himrisnky                              | 8  | 4 | 5 | 4.75 | 0.46 | 0.16 | 0 | 5 | 2.38 | 2.56 | 0.91 |
| <b>Karadzhandal</b>                    | 10 | 0 | 3 | 0.50 | 0.97 | 0.31 | 0 | 3 | 0.75 | 1.03 | 0.33 |
| Kishmish Sorkh                         | 6  | 5 | 5 | 5.00 | 0.00 | 0.00 | 0 | 5 | 2.50 | 2.74 | 1.12 |
| Magnolia ( <i>M. rotundifolia</i> )    | 4  | 0 | 1 | 0.25 | 0.50 | 0.25 | 0 | 0 | 0.00 | 0.00 | 0.00 |
| Mataro                                 | 10 | 3 | 5 | 4.40 | 0.70 | 0.22 | 0 | 5 | 2.40 | 1.96 | 0.62 |
| Mourv Famel                            | 10 | 4 | 5 | 4.50 | 0.53 | 0.17 | 0 | 5 | 2.50 | 2.27 | 0.72 |
| Rhazaki (Pa 1882)                      | 10 | 1 | 5 | 4.10 | 1.29 | 0.41 | 0 | 5 | 2.80 | 2.49 | 0.79 |
| Rhazaki De Crete                       | 10 | 4 | 5 | 4.90 | 0.32 | 0.10 | 0 | 5 | 2.60 | 2.37 | 0.75 |
| Rhazaki Mavro                          | 10 | 4 | 5 | 4.80 | 0.42 | 0.13 | 0 | 5 | 2.50 | 2.32 | 0.73 |

|                |                                                               |           |          |          |             |             |             |          |          |             |             |             |
|----------------|---------------------------------------------------------------|-----------|----------|----------|-------------|-------------|-------------|----------|----------|-------------|-------------|-------------|
|                | Thomas ( <i>M. rotundifolia</i> )                             | 4         | 0        | 0        | 0.00        | 0.00        | 0.00        | 0        | 0        | 0.00        | 0.00        | 0.00        |
|                | Trayshed ( <i>M. rotundifolia</i> )                           | 10        | 0        | 0        | 0.00        | 0.00        | 0.00        | 0        | 0        | 0.00        | 0.00        | 0.00        |
|                | Ugni blanc                                                    | 10        | 4        | 5        | 4.70        | 0.48        | 0.15        | 0        | 5        | 3.30        | 1.95        | 0.62        |
|                | Uzbek Muscat                                                  | 10        | 3        | 5        | 4.00        | 0.67        | 0.21        | 0        | 5        | 2.50        | 2.27        | 0.72        |
|                | <b>Villard blanc</b>                                          | 10        | 0        | 2        | 0.80        | 0.79        | 0.25        | 0        | 4        | 1.40        | 1.58        | 0.50        |
| <b>Group C</b> | DVIT3349.12                                                   | 20        | 3        | 5        | 4.30        | 0.67        | 0.21        | 0        | 5        | 2.70        | 2.26        | 0.72        |
|                | DVIT3351.23                                                   | 20        | 4        | 5        | 4.40        | 0.52        | 0.16        | 0        | 5        | 3           | 1.89        | 0.60        |
|                | <u>DVIT3351.27</u>                                            | <u>20</u> | <u>0</u> | <u>4</u> | <u>0.40</u> | <u>1.26</u> | <u>0.40</u> | <u>0</u> | <u>2</u> | <u>0.70</u> | <u>0.82</u> | <u>0.26</u> |
|                | <b>Karadzhandal</b>                                           | 4         | 0        | 0        | 0.00        | 0.00        | 0.00        | 1        | 2        | 1.50        | 0.71        | 0.50        |
|                | <u>O34-16</u>                                                 | <u>20</u> | <u>0</u> | <u>2</u> | <u>0.70</u> | <u>0.95</u> | <u>0.30</u> | <u>0</u> | <u>3</u> | <u>1.10</u> | <u>1.20</u> | <u>0.38</u> |
|                | Ruby Seedless                                                 | 4         | 4        | 5        | 4.50        | 0.71        | 0.50        | 4        | 5        | 4.50        | 0.71        | 0.50        |
|                | <b>Carignane</b>                                              | 4         | 4        | 5        | 4.50        | 0.71        | 0.50        | 5        | 5        | 5.00        | 0.00        | 0.00        |
| <b>Group D</b> | <b>Disease evaluations for samples from Vassal collection</b> |           |          |          |             |             |             |          |          |             |             |             |
|                | Kandari noir (1746Mtp I)                                      | 1         |          |          |             |             |             |          |          |             |             |             |
|                | Kara djandjal (2777Mtp1)                                      | 0         |          |          |             |             |             |          |          |             |             |             |
|                | Chirai obak (1186Mtp1)                                        | 0 - 1     |          |          |             |             |             |          |          |             |             |             |
|                | Vassarga tchernaia (2510Mtp1)                                 | 0 - 1     |          |          |             |             |             |          |          |             |             |             |
