# Supplementary material for: Identification of mildew resistance in wild and cultivated Central Asian grape germplasm
Source: PubMed Central journal article supplement (PMC3851849; doi:10.1186/1471-2229-13-149), 2013-10-04
Supplement: 1471-2229-13-149-S7.pdf [file 1471-2229-13-149-S7.pdf]

**Supplementary Table S7.** Observed probability of identity [P(Id)], probability of exclusion of a single parent and parent pair, and cumulated power of exclusion of a single parent and parent pair calculated from 394 unique accessions using FAMOZ on 34 SSR markers.

| SSR marker    | Number of identical pairs of genotypes | Observed probability of identity | Single parent observed exclusion (%) | Single parent cumulated exclusions (%) | Parent pair observed exclusion (%) | Parent pair cumulated exclusions (%) |
|---------------|----------------------------------------|----------------------------------|--------------------------------------|----------------------------------------|------------------------------------|--------------------------------------|
| VVIv67        | 1463                                   | 0.188977                         | 72.6                                 | 72.6                                   | 95.8                               | 95.8                                 |
| VMC8g9        | 47                                     | 6.07 E -4                        | 69.8                                 | 91.7                                   | 94.9                               | 99.8                                 |
| VMC7f2        | 3                                      | 3.90 E -5                        | 69.1                                 | 97.4                                   | 94.6                               | 100.0                                |
| VVMD27        | 2                                      | 2.60 E -5                        | 68.1                                 | 99.2                                   | 94.3                               | 100.0                                |
| UDV124        | 2                                      | 2.60 E -5                        | 65.4                                 | 99.7                                   | 93.1                               | 100.0                                |
| VrZAG62       | 2                                      | 2.60 E -5                        | 65.3                                 | 99.9                                   | 93.6                               | 100.0                                |
| VrZAG79       | 2                                      | 2.60 E -5                        | 64.8                                 | 100.0                                  | 93.2                               | 100.0                                |
| VVMD21        | 1                                      | 1.30 E -5                        | 63.1                                 | 100.0                                  | 92.1                               | 100.0                                |
| VVIn16        | 1                                      | 1.30 E -5                        | 62.9                                 | 100.0                                  | 92.2                               | 100.0                                |
| sc47-18       | 0                                      | 0.000000                         | 59.3                                 | 100.0                                  | 90.3                               | 100.0                                |
| VMC1b11       | 0                                      | 0.000000                         | 58.4                                 | 100.0                                  | 90.0                               | 100.0                                |
| VMCNg4e10.1   | 0                                      | 0.000000                         | 56.0                                 | 100.0                                  | 88.6                               | 100.0                                |
| VVMD5         | 0                                      | 0.000000                         | 55.7                                 | 100.0                                  | 88.6                               | 100.0                                |
| VMC2g6        | 0                                      | 0.000000                         | 55.5                                 | 100.0                                  | 88.6                               | 100.0                                |
| VVIn73        | 0                                      | 0.000000                         | 55.4                                 | 100.0                                  | 88.7                               | 100.0                                |
| VVMD7         | 0                                      | 0.000000                         | 53.4                                 | 100.0                                  | 87.2                               | 100.0                                |
| VVIh54        | 0                                      | 0.000000                         | 50.8                                 | 100.0                                  | 87.3                               | 100.0                                |
| SC08-0071-014 | 0                                      | 0.000000                         | 50.4                                 | 100.0                                  | 84.8                               | 100.0                                |
| VVS02         | 0                                      | 0.000000                         | 48.3                                 | 100.0                                  | 84.1                               | 100.0                                |
| VVIq52        | 0                                      | 0.000000                         | 47.9                                 | 100.0                                  | 82.9                               | 100.0                                |
| VVIv37        | 0                                      | 0.000000                         | 47.6                                 | 100.0                                  | 84.1                               | 100.0                                |
| VVMD32        | 0                                      | 0.000000                         | 47.0                                 | 100.0                                  | 84.4                               | 100.0                                |

|          |   |          |      |       |      |       |
|----------|---|----------|------|-------|------|-------|
| VVMD28   | 0 | 0.000000 | 43.7 | 100.0 | 80.4 | 100.0 |
| VVMD31   | 0 | 0.000000 | 41.1 | 100.0 | 78.3 | 100.0 |
| VVMD25   | 0 | 0.000000 | 39.6 | 100.0 | 76.5 | 100.0 |
| VVIb01   | 0 | 0.000000 | 38.7 | 100.0 | 76.3 | 100.0 |
| VMC4f3.1 | 0 | 0.000000 | 38.7 | 100.0 | 76.4 | 100.0 |
| VMC3d12  | 0 | 0.000000 | 36.9 | 100.0 | 74.1 | 100.0 |
| VMC2g2   | 0 | 0.000000 | 32.5 | 100.0 | 69.4 | 100.0 |
| VVIp60   | 0 | 0.000000 | 30.1 | 100.0 | 66.6 | 100.0 |
| UDV108   | 0 | 0.000000 | 29.5 | 100.0 | 65.9 | 100.0 |
| VVIp31   | 0 | 0.000000 | 28.6 | 100.0 | 62.7 | 100.0 |
| VVMD24   | 0 | 0.000000 | 20.1 | 100.0 | 55.9 | 100.0 |
| VMC4c6   | 0 | 0.000000 | 10.6 | 100.0 | 35.3 | 100.0 |

---
