# Supplementary material for: Identification of mildew resistance in wild and cultivated Central Asian grape germplasm
Source: PubMed Central journal article supplement (PMC3851849; doi:10.1186/1471-2229-13-149), 2013-10-04
Supplement: 1471-2229-13-149-S8.pdf [file 1471-2229-13-149-S8.pdf]

**Supplementary Table S8.** SSR marker profiles for 13 accessions with 34 markers. Eight additional markers were added to six accessions to verify parent progeny relationships. Missing data are noted with hyphens.

| Marker name    | Thompson seedless | Kismish Vatkana (20008-14 B) | Vassarga tchernaia (2510Mtp1) | Sochal (DVIT1126) | Karadzhandal (DVIT2323) | Late Vavilov (ARM Q01-16) | Khalchili (DVIT0431) | Yarghouti (TYR VI 17-19) | Chirai obak (1186Mtp1) | Husseine (DVIT0576) | O34-16 (DVIT1803) | Matrassa (2642Mtp2) | Soiaki (2657Mtp1) |
|----------------|-------------------|------------------------------|-------------------------------|-------------------|-------------------------|---------------------------|----------------------|--------------------------|------------------------|---------------------|-------------------|---------------------|-------------------|
| <b>VVIp60</b>  | 315-317           | 315-319                      | 315-319                       | 315-317           | 315-319                 | 315-319                   | 315-319              | 315-317                  | 315-317                | 313-315             | -:-               | 315-315             | 319-319           |
| <b>VVIb01</b>  | 290-298           | 294-298                      | 290-294                       | 294-298           | 290-294                 | 290-290                   | 298-298              | 290-298                  | 294-294                | 290-298             | 290-294           | 288-290             | 290-290           |
| <b>VVMD28</b>  | 217-243           | 217-233                      | 233-243                       | 243-245           | 233-257                 | 233-243                   | 243-245              | 217-243                  | 235-243                | 243-245             | 247-277           | 239-270             | 243-243           |
| <b>VVMD32</b>  | 249-249           | 249-271                      | 249-271                       | 257-271           | 249-271                 | 249-271                   | 249-271              | 249-271                  | 249-255                | 257-271             | 249-249           | 243-251             | 243-257           |
| <b>VMC4c6</b>  | 152-158           | 152-164                      | 164-164                       | 160-164           | 162-164                 | 160-164                   | 158-158              | 158-164                  | 152-152                | 158-164             | 152-152           | 153-164             | 164-168           |
| <b>VrZAG79</b> | 247-259           | 247-259                      | 247-255                       | 247-251           | 247-251                 | 247-249                   | 247-247              | 247-251                  | 247-257                | 247-249             | 249-251           | 239-259             | 249-251           |
| <b>VVMD27</b>  | 181-194           | 179-194                      | 179-194                       | 179-185           | 179-194                 | 179-194                   | 181-194              | 181-185                  | 181-194                | 179-194             | 179-193           | 181-185             | 181-185           |
| <b>VMC2g2</b>  | 129-129           | 129-129                      | 129-135                       | 123-129           | 129-137                 | 129-131                   | 129-129              | 123-129                  | -:-                    | 129-137             | 127-129           | 135-137             | 131-137           |
| <b>VVMD21</b>  | 247-254           | 247-254                      | 247-247                       | 247-247           | 247-247                 | 247-247                   | 247-247              | 247-254                  | 241-246                | 241-249             | -:-               | 241-241             | 241-247           |
| <b>VrZAG62</b> | 189-189           | 189-203                      | 201-203                       | 189-203           | 189-197                 | 189-197                   | 189-189              | 189-189                  | 189-205                | 189-197             | 205-205           | 195-203             | 189-205           |
| <b>VVMD31</b>  | 212-212           | 212-212                      | 212-212                       | 196-212           | 196-210                 | 210-212                   | 210-212              | 210-212                  | 212-214                | 196-212             | 216-220           | 212-212             | 212-212           |
| <b>VVMD7</b>   | 239-253           | 239-249                      | 249-249                       | 243-249           | 243-249                 | 249-253                   | 243-253              | 243-253                  | 243-243                | 233-243             | 247-255           | 249-262             | 233-243           |
| <b>VMC1b11</b> | 165-183           | 165-183                      | 165-169                       | 169-193           | 165-169                 | 165-169                   | 165-183              | 173-183                  | 165-169                | 165-193             | 165-185           | 183-183             | 165-165           |
| <b>VVIq52</b>  | 79-83             | 77-83                        | 77-77                         | 77-79             | 77-79                   | 77-79                     | 77-79                | 79-83                    | 79-83                  | 77-79               | 81-81             | 77-79               | 83-83             |

|                      |         |         |         |         |         |         |         |         |         |         |         |         |         |
|----------------------|---------|---------|---------|---------|---------|---------|---------|---------|---------|---------|---------|---------|---------|
| <b>VVIv37</b>        | 155-177 | 177-177 | 155-177 | 167-177 | 177-177 | 177-177 | 155-173 | 155-177 | 145-177 | 173-177 | 149-159 | 159-167 | 167-177 |
| <b>VVMD25</b>        | 238-248 | 238-238 | 238-240 | 240-244 | 240-244 | 240-248 | 238-254 | 238-262 | 254-256 | 244-254 | 240-240 | 238-240 | 254-256 |
| <b>VVS02</b>         | 145-151 | 137-145 | 125-137 | 125-151 | 125-155 | 125-151 | 143-145 | 143-145 | 137-143 | 141-155 | 133-133 | 135-145 | 135-141 |
| <b>VMC4f3.1</b>      | 188-190 | 164-190 | 164-190 | 164-202 | 182-202 | 182-202 | 172-186 | 186-190 | 172-182 | 172-172 | 178-178 | 186-202 | 172-182 |
| <b>VMC8g9</b>        | 164-171 | 164-171 | 159-164 | 164-171 | 164-171 | 170-171 | 173-176 | 171-173 | 164-170 | 164-176 | 164-176 | 164-176 | 159-161 |
| <b>sc47-18</b>       | 231-236 | 231-249 | 231-249 | 216-249 | 227-249 | 231-249 | 215-249 | 215-236 | 227-249 | 242-249 | 215-249 | 216-240 | 216-249 |
| <b>SC08-0071-014</b> | 159-159 | 143-159 | 143-159 | 143-173 | 143-175 | 143-159 | 143-159 | 159-199 | 143-175 | 143-167 | 143-159 | 143-173 | 143-173 |
| <b>UDV124</b>        | 218-220 | 216-218 | 198-216 | 198-216 | 216-220 | 216-218 | 212-218 | 218-220 | 216-228 | 216-220 | 216-218 | 198-216 | 216-218 |
| <b>VMC3d12</b>       | 201-234 | 198-234 | 195-198 | 195-198 | 195-198 | 198-248 | 202-217 | 200-202 | 198-206 | 195-198 | 199-202 | 195-200 | 198-202 |
| <b>VMCNg4e10.1</b>   | 236-277 | 236-260 | 251-260 | 239-260 | 254-260 | 236-260 | 260-271 | 271-277 | 254-260 | 251-260 | 260-271 | 248-251 | 251-260 |
| <b>VVIh54</b>        | 163-165 | 139-163 | 139-165 | 139-165 | 139-139 | 139-165 | 165-177 | 165-165 | 151-165 | 139-139 | 139-175 | 151-165 | 139-151 |
| <b>VVMD24</b>        | 206-215 | 206-215 | 206-214 | --      | 210-214 | 210-215 | 206-218 | 206-215 | 206-206 | 215-215 | 204-208 | 206-210 | 206-214 |
| <b>VVIv67</b>        | 353-353 | 353-353 | 353-360 | 353-353 | 353-360 | 360-376 | 353-360 | 353-360 | 353-366 | 353-353 | 353-353 | 357-368 | 347-353 |
| <b>VVMD5</b>         | 234-234 | 234-240 | 234-240 | 234-238 | 234-240 | 234-240 | 238-240 | 234-240 | 236-240 | 234-240 | 228-246 | 228-240 | 228-240 |
| <b>VVIIn73</b>       | 261-263 | 261-263 | 256-263 | 256-263 | 263-267 | 263-263 | 263-267 | 261-267 | 256-263 | 263-263 | 263-267 | 256-265 | 256-263 |
| <b>UDV108</b>        | 204-218 | 218-218 | 218-218 | 218-242 | 242-244 | 244-244 | 218-242 | 218-242 | 244-244 | 242-242 | 242-242 | 236-236 | 242-242 |
| <b>VMC2g6</b>        | 129-135 | 129-135 | 129-135 | 129-129 | 129-135 | 129-135 | 129-135 | 129-135 | 129-129 | 129-129 | 129-135 | 129-129 | 131-131 |
| <b>VMC7f2</b>        | 197-199 | 197-199 | 199-199 | 199-199 | 197-199 | 197-203 | 197-199 | 197-199 | 199-203 | 199-199 | 197-197 | 199-199 | --      |
| <b>VVIIn16</b>       | 151-155 | --      | 151-151 | 151-155 | 155-155 | 151-155 | 149-155 | 151-155 | 151-151 | 149-149 | 147-151 | 151-151 | 149-151 |

|                  |         |         |         |         |         |         |         |         |         |         |         |         |         |
|------------------|---------|---------|---------|---------|---------|---------|---------|---------|---------|---------|---------|---------|---------|
| <b>VVIp31</b>    | 178-182 | 178-182 | 182-182 | 178-182 | 182-186 | 182-186 | 190-194 | 178-194 | 158-188 | 178-186 | 174-178 | 178-182 | 188-194 |
| <b>VMC2c10.1</b> | 163-173 | 147-173 | 147-153 | 147-163 | 147-173 | 159-173 | --      | --      | --      | --      | --      | --      | --      |
| <b>VMC2e7</b>    | 169-173 | 169-173 | 161-173 | 159-161 | 159-173 | 159-173 | --      | --      | --      | --      | --      | --      | --      |
| <b>VMC4d4</b>    | 159-162 | 159-162 | 162-162 | 162-162 | 162-162 | 159-162 | --      | --      | --      | --      | --      | --      | --      |
| <b>VMC7g5</b>    | 164-164 | 164-164 | 164-170 | 164-170 | 164-164 | 164-164 | --      | --      | --      | --      | --      | --      | --      |
| <b>VMC2h10</b>   | 128-132 | 128-132 | 112-128 | 118-128 | 116-128 | 116-128 | --      | --      | --      | --      | --      | --      | --      |
| <b>VMC5c1</b>    | 145-151 | 151-151 | 145-151 | 145-145 | 145-145 | 145-145 | --      | --      | --      | --      | --      | --      | --      |
| <b>VMC3e12</b>   | 153-153 | 153-153 | 153-153 | 127-153 | 127-153 | 153-153 | --      | --      | --      | --      | --      | --      | --      |
| <b>VMC3b7.2</b>  | 93-105  | 93-105  | 93-93   | 93-111  | 107-121 | 107-121 | --      | --      | --      | --      | --      | --      | --      |

Formatted Table
