# Supplementary material for: Identification of mildew resistance in wild and cultivated Central Asian grape germplasm
Source: PubMed Central journal article supplement (PMC3851849; doi:10.1186/1471-2229-13-149), 2013-10-04
Supplement: 1471-2229-13-149-S9.pdf [file 1471-2229-13-149-S9.pdf]

**Supplementary Table S9.** The estimated coefficients of membership proportions values (Q-values) for the three ancestral genetic clusters inferred with STRUCTURE.

| Accession ID | Species               | Accession name | Source country<br>/Collection | Group A<br>(Species) | Group B<br>(O34-16) | Group C<br>(TSL) |
|--------------|-----------------------|----------------|-------------------------------|----------------------|---------------------|------------------|
| DVIT1159.9   | <i>V. coignetiae</i>  |                | Unknown                       | 0.998                | 0.001               | 0.001            |
| DVIT2008.5   | <i>V. ficifolia</i>   |                | South Korea                   | 0.998                | 0.001               | 0.001            |
| GVIT 859     | <i>V. piasezkii</i>   | 597257.03      | China                         | 0.997                | 0.002               | 0.001            |
| DVIT1158.1   | <i>V. amurensis</i>   |                | China                         | 0.997                | 0.002               | 0.001            |
| DVIT2008.7   | <i>V. ficifolia</i>   |                | South Korea                   | 0.997                | 0.001               | 0.001            |
| DVIT2027     | <i>V. piasezkii</i>   |                | Asia                          | 0.997                | 0.002               | 0.002            |
| DVIT1158.4   | <i>V. amurensis</i>   |                | China                         | 0.996                | 0.002               | 0.002            |
| 597296.01    | <i>V. romanetii</i>   | C-166-025      | China                         | 0.996                | 0.002               | 0.002            |
| 597294.01    | <i>Vitis</i> species  | A-166-003      | China                         | 0.995                | 0.003               | 0.002            |
| DVIT1157.12  | <i>V. amurensis</i>   |                | China                         | 0.995                | 0.002               | 0.003            |
| DVIT1157.2   | <i>V. amurensis</i>   |                | China                         | 0.995                | 0.003               | 0.002            |
| DVIT2596.1   | <i>V. betulifolia</i> |                | China                         | 0.995                | 0.003               | 0.003            |
| DVIT2005.5   | <i>V. amurensis</i>   |                | China                         | 0.994                | 0.003               | 0.003            |
| 597295.01    | <i>Vitis</i> species  | J-167-048      | China                         | 0.994                | 0.003               | 0.003            |
| DVIT2550     | <i>V. romanetii</i>   | C-166-026      | China                         | 0.993                | 0.004               | 0.003            |
| DVIT1159.3   | <i>V. coignetiae</i>  |                | Unknown                       | 0.992                | 0.004               | 0.005            |
| DVIT1156.2   | <i>V. amurensis</i>   |                | China                         | 0.99                 | 0.006               | 0.004            |
| DVIT3192     | <i>V. romanetii</i>   | C-166-043      | China                         | 0.99                 | 0.007               | 0.003            |

|             |                        |               |             |       |       |       |
|-------------|------------------------|---------------|-------------|-------|-------|-------|
| DVIT2032    | <i>V. piasezkii</i>    |               | Asia        | 0.99  | 0.004 | 0.006 |
| DVIT1160.7  | <i>V. ficifolia</i>    |               | China       | 0.987 | 0.007 | 0.006 |
| DVIT1159.10 | <i>V. coignetiae</i>   |               | Unknown     | 0.985 | 0.006 | 0.009 |
| GVIT 814    | <i>V. amurensis</i>    | 588452.b      | USSR        | 0.982 | 0.012 | 0.006 |
| DVIT2006.1  | <i>V. amurensis</i>    |               | South Korea | 0.958 | 0.02  | 0.022 |
| DVIT1385    | <i>V. flexouosa</i>    |               | Unknown     | 0.919 | 0.068 | 0.014 |
| DVIT1815    | <i>V. lanata</i>       | O35-59        | Afghanistan | 0.896 | 0.072 | 0.033 |
| PI# 588421  | <i>V. yenshanensis</i> | 588421.a      | China       | 0.77  | 0.037 | 0.193 |
| PI# 588422  | <i>V. yenshanensis</i> | 588422.a      | China       | 0.759 | 0.19  | 0.051 |
| 597298.01   | <i>Vitis</i> species   | B-166-016     | China       | 0.565 | 0.382 | 0.053 |
| DVIT0434    | <i>V. vinifera</i>     | Khir Ghulaman | Afghanistan | 0.401 | 0.293 | 0.307 |
| DVIT3356.38 | <i>V. sylvestris</i>   |               | Armenia     | 0.002 | 0.996 | 0.003 |
| DVIT1805    | <i>V. sylvestris</i>   | O34-46        | Iran        | 0.001 | 0.996 | 0.003 |
| DVIT3353.31 | <i>V. sylvestris</i>   |               | Armenia     | 0.001 | 0.996 | 0.002 |
| DVIT3348.17 | <i>V. sylvestris</i>   |               | Georgia     | 0.001 | 0.996 | 0.002 |
| DVIT3357.4  | <i>V. sylvestris</i>   |               | Georgia     | 0.001 | 0.996 | 0.002 |
| DVIT3353.43 | <i>V. sylvestris</i>   |               | Armenia     | 0.002 | 0.995 | 0.003 |
| DVIT3357.30 | <i>V. sylvestris</i>   |               | Georgia     | 0.002 | 0.995 | 0.002 |
| 2509Mtp1    | <i>V. vinifera</i>     | Boulany       | Russia      | 0.002 | 0.995 | 0.004 |
| DVIT1806    | <i>V. sylvestris</i>   | O34-54        | Iran        | 0.001 | 0.995 | 0.004 |
| 1183Mtp1    | <i>V. vinifera</i>     | Alü tierskü   | Russia      | 0.001 | 0.995 | 0.004 |
| DVIT0773    | <i>V. vinifera</i>     | Kara Lakana   | USSR        | 0.001 | 0.995 | 0.004 |

|              |                      |                     |              |       |       |       |
|--------------|----------------------|---------------------|--------------|-------|-------|-------|
| 2642Mtp2     | <i>V. vinifera</i>   | Matrassa            | Azerbaijan   | 0.001 | 0.995 | 0.004 |
| DVIT0673     | <i>V. vinifera</i>   | Buaki               | Russia       | 0.003 | 0.994 | 0.003 |
| DVIT3355.5   | <i>V. sylvestris</i> |                     | Armenia      | 0.002 | 0.994 | 0.004 |
| 1985Mtp2     | <i>V. vinifera</i>   | Tolstokory          | Russia       | 0.001 | 0.994 | 0.005 |
| DVIT1809     | <i>V. sylvestris</i> | O35-11              | Iran         | 0.003 | 0.993 | 0.004 |
| DVIT1807     | <i>V. sylvestris</i> | O34-55              | Iran         | 0.002 | 0.993 | 0.005 |
| DVIT0307     | <i>V. vinifera</i>   | Al Borla            | USSR         | 0.002 | 0.993 | 0.005 |
| DVIT0329     | <i>V. vinifera</i>   | Kovalewka           | USSR         | 0.001 | 0.993 | 0.006 |
| DVIT3355.4   | <i>V. sylvestris</i> |                     | Armenia      | 0.004 | 0.992 | 0.004 |
| DVIT0312     | <i>V. vinifera</i>   | Blanc De Crimei     | USSR         | 0.002 | 0.992 | 0.006 |
| 0Mtp780      | <i>V. vinifera</i>   | Nassau              | Russia       | 0.002 | 0.992 | 0.006 |
| TYR VI 10-03 | <i>V. vinifera</i>   | Afuz-Ali Urmasti    | Unknown      | 0.001 | 0.992 | 0.007 |
| 857Mtp1      | <i>V. vinifera</i>   | De Hengril          | Russia       | 0.001 | 0.992 | 0.007 |
| DVIT1808     | <i>V. sylvestris</i> | O35-07              | Iran         | 0.002 | 0.991 | 0.007 |
| 2737Mtp1     | <i>V. vinifera</i>   | Razakiia piembiana  | Russia       | 0.001 | 0.991 | 0.008 |
| DVIT3356.33  | <i>V. sylvestris</i> |                     | Armenia      | 0.005 | 0.99  | 0.005 |
| DVIT2442.6   | <i>V. sylvestris</i> | Arybata             | Turkmenistan | 0.003 | 0.99  | 0.007 |
| TYR VI 13-17 | <i>V. vinifera</i>   | Jane De Smirna      | Unknown      | 0.002 | 0.99  | 0.008 |
| 1737Mtp1     | <i>V. vinifera</i>   | Schiradzouli violet | Iran         | 0.002 | 0.99  | 0.008 |
| 0Mtp1073     | <i>V. vinifera</i>   | Starinky            | Russia       | 0.001 | 0.99  | 0.009 |
| 0Mtp1165     | <i>V. vinifera</i>   | Varuschkin          | Russia       | 0.001 | 0.99  | 0.008 |
| DVIT3351.27  | <i>V. sylvestris</i> |                     | Armenia      | 0.002 | 0.989 | 0.008 |

|              |                      |                           |              |       |       |       |
|--------------|----------------------|---------------------------|--------------|-------|-------|-------|
| Turkmn 21551 | <i>V. vinifera</i>   | Karga Dili                | Turkmenistan | 0.002 | 0.989 | 0.009 |
| TYR VI 16-09 | <i>V. vinifera</i>   | Rhazaki (Pa 1882)         | Unknown      | 0.002 | 0.989 | 0.009 |
| 0Mtp318      | <i>V. vinifera</i>   | Doppelaugen               | Azerbaijan   | 0.001 | 0.989 | 0.01  |
| 0Mtp565      | <i>V. vinifera</i>   | Kanfet isium              | Russia       | 0.001 | 0.989 | 0.009 |
| DVIT2641     | <i>V. vinifera</i>   | Leanoy                    | USSR         | 0.001 | 0.989 | 0.01  |
| 1218Mtp1     | <i>V. vinifera</i>   | Tavkveri                  | Azerbaijan   | 0.001 | 0.989 | 0.01  |
| TYR VI 15-13 | <i>V. vinifera</i>   | Mzivani                   | Unknown      | 0.009 | 0.988 | 0.003 |
| DVIT3349.12  | <i>V. sylvestris</i> |                           | Georgia      | 0.008 | 0.988 | 0.004 |
| DVIT0320     | <i>V. vinifera</i>   | Murma Isium               | USSR         | 0.002 | 0.988 | 0.009 |
| DVIT0310     | <i>V. vinifera</i>   | Barmak Isium              | Turkey       | 0.001 | 0.988 | 0.011 |
| DVIT3350.25  | <i>V. sylvestris</i> |                           | Georgia      | 0.009 | 0.987 | 0.004 |
| DVIT0311     | <i>V. vinifera</i>   | Bias Kukuzeti             | USSR         | 0.001 | 0.986 | 0.013 |
| DVIT2306     | <i>V. vinifera</i>   | Baharat Early             | India        | 0.008 | 0.984 | 0.008 |
| DVIT2603     | <i>V. vinifera</i>   | Shingargoon               | Pakistan     | 0.002 | 0.984 | 0.014 |
| DVIT0305     | <i>V. vinifera</i>   | Abla Aganin Isium         | USSR         | 0.001 | 0.984 | 0.015 |
| 0Mtp225      | <i>V. vinifera</i>   | Chassany                  | Azerbaijan   | 0.001 | 0.984 | 0.014 |
| DVIT2293     | <i>V. vinifera</i>   | Pakistan Collection 25265 | Pakistan     | 0.005 | 0.983 | 0.012 |
| 2678Mtp2     | <i>V. vinifera</i>   | Chirvan chakki            | Azerbaijan   | 0.001 | 0.983 | 0.016 |
| Turkmn 13381 | <i>V. vinifera</i>   | DK #17                    | Turkmenistan | 0.002 | 0.982 | 0.016 |
| DVIT0413     | <i>V. vinifera</i>   | Gros Colman               | USSR         | 0.001 | 0.982 | 0.017 |
| DVIT2451     | <i>V. vinifera</i>   | Kashiri                   | Pakistan     | 0.001 | 0.982 | 0.016 |
| DVIT1841     | <i>V. vinifera</i>   | Beli Potok                | Yugoslavia   | 0.012 | 0.981 | 0.007 |

|              |                        |                      |              |       |       |       |
|--------------|------------------------|----------------------|--------------|-------|-------|-------|
| DVIT0343     | <i>V. vinifera</i>     | Askari               | Afghanistan  | 0.004 | 0.981 | 0.015 |
| DVIT2496     | <i>V. vinifera</i>     | Boyalsing I          | Pakistan     | 0.003 | 0.981 | 0.016 |
| 2951Mtp1     | <i>V. vinifera</i>     | Kaytagi              | Russia       | 0.001 | 0.981 | 0.018 |
| 2190Mtp1     | <i>V. vinifera</i>     | Khatmi               | Russia       | 0.001 | 0.981 | 0.017 |
| 2842Mtp1     | <i>V. vinifera</i>     | Ag Kiourdach p.e.    | Azerbaijan   | 0.001 | 0.98  | 0.019 |
| DVIT0314     | <i>V. vinifera</i>     | Demir Kara           | USSR         | 0.001 | 0.98  | 0.019 |
| DVIT1813     | <i>V. sylvestris</i>   | O35-50               | Afghanistan  | 0.002 | 0.979 | 0.02  |
| DVIT0328     | <i>V. vinifera</i>     | Himrisnky            | USSR         | 0.005 | 0.978 | 0.017 |
| DVIT2440.9   | <i>V. sylvestris</i>   | Ayedere              | Turkmenistan | 0.002 | 0.978 | 0.02  |
| Turkmn 13374 | <i>V. vinifera</i>     | DK Melkii Krasnyi    | Turkmenistan | 0.001 | 0.978 | 0.021 |
| DVIT0313     | <i>V. vinifera</i>     | Cirmisi Sap De Sudak | USSR         | 0.002 | 0.977 | 0.022 |
| 2666Mtp1     | <i>V. vinifera</i>     | Zimliansky noir      | Russia       | 0.001 | 0.977 | 0.022 |
| Turkmn 13359 | <i>V. vinifera</i>     | DK #02               | Turkmenistan | 0.001 | 0.976 | 0.022 |
| DVIT2539     | <i>V. Jacquemontii</i> | Kali Dakh II         | Pakistan     | 0.016 | 0.974 | 0.01  |
| DVIT2447.9   | <i>V. sylvestris</i>   | Uzuntakoy            | Turkmenistan | 0.002 | 0.974 | 0.025 |
| Turkmn 13361 | <i>V. vinifera</i>     | DK #04               | Turkmenistan | 0.001 | 0.974 | 0.025 |
| DVIT2501     | <i>V. vinifera</i>     | Berurargoon          | Pakistan     | 0.002 | 0.972 | 0.026 |
| DVIT2510     | <i>V. vinifera</i>     | Fatai                | Pakistan     | 0.002 | 0.972 | 0.026 |
| Turkmn 13379 | <i>V. vinifera</i>     | DK #21 Chernyi       | Turkmenistan | 0.002 | 0.97  | 0.027 |
| Turkmn 6272  | <i>V. vinifera</i>     | DK #9                | Turkmenistan | 0.001 | 0.97  | 0.028 |
| DVIT0499     | <i>V. vinifera</i>     | Red Ohanez           | Russia       | 0.001 | 0.97  | 0.029 |
| 2648Mtp2     | <i>V. vinifera</i>     | Narma                | Russia       | 0.002 | 0.969 | 0.029 |

|                |                      |                        |              |       |       |       |
|----------------|----------------------|------------------------|--------------|-------|-------|-------|
| DVIT2730       | <i>V. vinifera</i>   | Chamo                  | Pakistan     | 0.002 | 0.968 | 0.031 |
| DVIT2532       | <i>V. vinifera</i>   | Churgoon               | Pakistan     | 0.002 | 0.968 | 0.03  |
| DVIT2688       | <i>V. vinifera</i>   | Tchilar                | Russia       | 0.002 | 0.968 | 0.03  |
| DVIT3349.8     | <i>V. sylvestris</i> | sylvestris             | Georgia      | 0.029 | 0.966 | 0.005 |
| DVIT0783       | <i>V. vinifera</i>   | Koptcha                | Russia       | 0.008 | 0.965 | 0.027 |
| DVIT0501       | <i>V. vinifera</i>   | Rhazaki De Crete       | Greece       | 0.002 | 0.965 | 0.033 |
| DVIT2498       | <i>V. vinifera</i>   | Millishun              | Pakistan     | 0.002 | 0.964 | 0.033 |
| DVIT0319       | <i>V. vinifera</i>   | Mourvedre Famellestadt | USSR         | 0.001 | 0.962 | 0.037 |
| Turkmn 16392   | <i>V. vinifera</i>   | Chol Uzyum             | Turkmenistan | 0.003 | 0.959 | 0.038 |
| DVIT0759       | <i>V. vinifera</i>   | Hisakasy               | Russia       | 0.001 | 0.959 | 0.04  |
| Turkmn 13365   | <i>V. vinifera</i>   | DK #08                 | Turkmenistan | 0.006 | 0.958 | 0.035 |
| DVIT2664       | <i>V. vinifera</i>   | Zimsko Belo            | Yugoslavia   | 0.001 | 0.958 | 0.041 |
| DVIT0597       | <i>V. vinifera</i>   | Salomani               | Iraq         | 0.001 | 0.956 | 0.043 |
| DVIT2537       | <i>V. vinifera</i>   | Gaschochi              | Pakistan     | 0.003 | 0.955 | 0.041 |
| DVIT1042       | <i>V. vinifera</i>   | Mermark                | Iraq         | 0.003 | 0.955 | 0.042 |
| Turkmn 13358   | <i>V. vinifera</i>   | DK #01                 | Turkmenistan | 0.002 | 0.953 | 0.044 |
| 2271Mtp2       | <i>V. vinifera</i>   | Baïan chirei           | Azerbaijan   | 0.001 | 0.953 | 0.046 |
| 1983-0-2424-S1 | <i>V. vinifera</i>   | Voivoginiovva S1       | USSR         | 0.001 | 0.953 | 0.046 |
| DVIT2445.12    | <i>V. sylvestris</i> | Kara Kaytak            | Turkmenistan | 0.007 | 0.951 | 0.043 |
| 0Mtp1795       | <i>V. vinifera</i>   | Mesisti rose           | Russia       | 0.002 | 0.951 | 0.047 |
| 0000-0-4432-S1 | <i>V. vinifera</i>   | Fetyaska S1            | Russia       | 0.002 | 0.95  | 0.048 |
| DVIT2447.4     | <i>V. sylvestris</i> | Uzuntakoy              | Turkmenistan | 0.006 | 0.949 | 0.045 |

|              |                      |                        |              |       |       |       |
|--------------|----------------------|------------------------|--------------|-------|-------|-------|
| DVIT2495     | <i>V. vinifera</i>   | Kini Yatch             | Pakistan     | 0.01  | 0.946 | 0.044 |
| DVIT0315     | <i>V. vinifera</i>   | Dschan Im Isium        | USSR         | 0.001 | 0.945 | 0.053 |
| TYR VI 11-13 | <i>V. vinifera</i>   | Caus X Pearl Csaba     | Yugoslavia   | 0.005 | 0.942 | 0.053 |
| 2651Mtp2     | <i>V. vinifera</i>   | Pervenetz Praskoveisky | Russia       | 0.003 | 0.942 | 0.055 |
| DVIT2685     | <i>V. vinifera</i>   | Sev Lernatu PRG 2224   | Russia       | 0.001 | 0.942 | 0.056 |
| 664Mtp1      | <i>V. vinifera</i>   | Tchatyrbac             | Uzbekistan   | 0.001 | 0.942 | 0.057 |
| DVIT2531     | <i>V. vinifera</i>   | Torgoon                | Pakistan     | 0.002 | 0.941 | 0.057 |
| DVIT0634     | <i>V. vinifera</i>   | Alburla                | USSR         | 0.003 | 0.94  | 0.056 |
| DVIT0338     | <i>V. vinifera</i>   | Alulu                  | Iraq         | 0.002 | 0.937 | 0.061 |
| DVIT0308     | <i>V. vinifera</i>   | Asma                   | USSR         | 0.001 | 0.936 | 0.063 |
| 0Mtp1031     | <i>V. vinifera</i>   | Sary Kiriak            | Azerbaijan   | 0.001 | 0.936 | 0.063 |
| 654Mtp1      | <i>V. vinifera</i>   | Tuia-tiche p.e.        | Russia       | 0.002 | 0.934 | 0.065 |
| 0Mtp928      | <i>V. vinifera</i>   | Précoce d'Astrakan     | Iran         | 0.002 | 0.933 | 0.064 |
| 2635Mtp1     | <i>V. vinifera</i>   | Koz ouzioum            | Russia       | 0.001 | 0.93  | 0.069 |
| DVIT2919     | <i>V. vinifera</i>   | Khawngi                | India        | 0.059 | 0.927 | 0.014 |
| DVIT2440.1   | <i>V. sylvestris</i> | Ayedere                | Turkmenistan | 0.006 | 0.927 | 0.067 |
| DVIT2442.1   | <i>V. sylvestris</i> | Arybata                | Turkmenistan | 0.002 | 0.927 | 0.071 |
| DVIT0330     | <i>V. vinifera</i>   | Noir D'automne         | USSR         | 0.001 | 0.926 | 0.072 |
| DVIT3351.23  | <i>V. sylvestris</i> |                        | Armenia      | 0.002 | 0.921 | 0.077 |
| DVIT1802     | <i>V. sylvestris</i> | O33-60                 | Iran         | 0.015 | 0.91  | 0.074 |
| DVIT1811     | <i>V. sylvestris</i> | O35-41                 | Iran         | 0.001 | 0.91  | 0.089 |
| 2597Mtp1     | <i>V. vinifera</i>   | Peikani                | Iran         | 0.001 | 0.909 | 0.09  |

|                |                      |                           |              |       |       |       |
|----------------|----------------------|---------------------------|--------------|-------|-------|-------|
| TYR VI 17-11   | <i>V. vinifera</i>   | Uzbekistan Muscat         | Unknown      | 0.011 | 0.908 | 0.081 |
| DVIT1798       | <i>V. sylvestris</i> | O30-44                    | Iran         | 0.008 | 0.908 | 0.084 |
| 2505Mtp1       | <i>V. vinifera</i>   | Assylkara                 | Russia       | 0.002 | 0.907 | 0.09  |
| 0Mtp750        | <i>V. vinifera</i>   | Mouchketny                | Russia       | 0.02  | 0.905 | 0.074 |
| DVIT1812       | <i>V. sylvestris</i> | O35-47                    | Iran         | 0.003 | 0.904 | 0.093 |
| Turkmn 13375   | <i>V. vinifera</i>   | DK Melkii Chernyi         | Turkmenistan | 0.012 | 0.902 | 0.086 |
| DVIT1800       | <i>V. sylvestris</i> | O30-53                    | Afghanistan  | 0.024 | 0.901 | 0.076 |
| DVIT1152       | <i>V. vinifera</i>   | Selection 2798 (seedless) | Yugoslavia   | 0.002 | 0.901 | 0.098 |
| DVIT2263       | <i>V. vinifera</i>   | Pakistan Collection 25275 | Pakistan     | 0.097 | 0.896 | 0.007 |
| DVIT1804       | <i>V. sylvestris</i> | O34-29                    | Iran         | 0.009 | 0.895 | 0.096 |
| DVIT0555       | <i>V. vinifera</i>   | Rhazaki Mavro             | Unknown      | 0.001 | 0.891 | 0.108 |
| 0000-0-2411-S1 | <i>V. vinifera</i>   | Trapanlarin kara S1       | USSR         | 0.004 | 0.874 | 0.122 |
| DVIT2636       | <i>V. vinifera</i>   | Fayoumi                   | Egypt        | 0.032 | 0.866 | 0.102 |
| DVIT1799       | <i>V. sylvestris</i> | O30-51                    | Afghanistan  | 0.012 | 0.866 | 0.123 |
| DVIT2755       | <i>V. vinifera</i>   | Persian R27               | Unknown      | 0.121 | 0.865 | 0.014 |
| TYR VI 10-05   | <i>V. vinifera</i>   | Agaday                    | Unknown      | 0.001 | 0.859 | 0.139 |
| 2088Mtp1       | <i>V. vinifera</i>   | Askari noir               | Iran         | 0.002 | 0.847 | 0.151 |
| DVIT1803       | <i>V. sylvestris</i> | O34-16                    | Iran         | 0.031 | 0.845 | 0.123 |
| 2640Mtp1       | <i>V. vinifera</i>   | Lkeni noir                | Azerbaijan   | 0.001 | 0.841 | 0.158 |
| DVIT2446.12    | <i>V. sylvestris</i> | Yuvankala                 | Turkmenistan | 0.002 | 0.839 | 0.159 |
| 1679Mtp2       | <i>V. vinifera</i>   | Kechmisch aly violet      | Iran         | 0.003 | 0.837 | 0.16  |
| 1981-0-2233-S1 | <i>V. vinifera</i>   | Bez el Anza S1            | Egypt        | 0.002 | 0.83  | 0.168 |

|              |                        |                           |              |       |       |       |
|--------------|------------------------|---------------------------|--------------|-------|-------|-------|
| Turkmn 13377 | <i>V. vinifera</i>     | DK #39                    | Turkmenistan | 0.001 | 0.825 | 0.174 |
| DVIT2536     | <i>V. vinifera</i>     | Dardari                   | Pakistan     | 0.002 | 0.824 | 0.174 |
| DVIT2283     | <i>V. vinifera</i>     | Pakistan Collection 25296 | Pakistan     | 0.002 | 0.819 | 0.179 |
| DVIT2507     | <i>V. vinifera</i>     | Neelilay                  | Pakistan     | 0.001 | 0.816 | 0.182 |
| 2676Mtp1     | <i>V. vinifera</i>     | Chaani noir               | Azerbaijan   | 0.001 | 0.811 | 0.188 |
| DVIT2349.13  | <i>V. jacquemontii</i> |                           | Pakistan     | 0.254 | 0.736 | 0.011 |
| DVIT2168     | <i>V. vinifera</i>     | Shtur Angur               | USSR         | 0.002 | 0.733 | 0.265 |
| TYR VI 17-03 | <i>V. vinifera</i>     | Taka Sago                 | Japan        | 0.173 | 0.72  | 0.107 |
| DVIT2355.11  | <i>V. jacquemontii</i> |                           | Pakistan     | 0.265 | 0.714 | 0.021 |
| DVIT2497     | <i>V. vinifera</i>     | Kabuli                    | Pakistan     | 0.005 | 0.705 | 0.29  |
| DVIT2296     | <i>V. vinifera</i>     | Pakistan Collection 25290 | Pakistan     | 0.014 | 0.691 | 0.295 |
| Turkmn 30748 | <i>V. vinifera</i>     | Orion                     | Turkmenistan | 0.001 | 0.687 | 0.311 |
| DVIT3350.2   | <i>V. sylvestris</i>   |                           | Georgia      | 0.307 | 0.684 | 0.009 |
| DVIT2503     | <i>V. vinifera</i>     | Hosargoon                 | Pakistan     | 0.002 | 0.658 | 0.34  |
| DVIT2444.19  | <i>V. sylvestris</i>   | Kochtemyr                 | Turkmenistan | 0.013 | 0.65  | 0.337 |
| 2687Mtp1     | <i>V. vinifera</i>     | Yaī izium rose            | Russia       | 0.002 | 0.578 | 0.42  |
| DVIT2354.7   | <i>V. jacquemontii</i> |                           | Pakistan     | 0.419 | 0.572 | 0.009 |
| 0Mtp950      | <i>V. vinifera</i>     | Rajoulan                  | Russia       | 0.002 | 0.52  | 0.478 |
| 588650       | <i>V. yenshanensis</i> | 588650.a                  | China        | 0.477 | 0.517 | 0.006 |
| 1750Mtp1     | <i>V. vinifera</i>     | Raziki                    | Yemen        | 0.003 | 0.511 | 0.485 |
| DVIT2446.9   | <i>V. sylvestris</i>   | Yuvankala                 | Turkmenistan | 0.004 | 0.492 | 0.504 |
| 588715.01    | <i>Vitis species</i>   | B-166-019                 | China        | 0.45  | 0.463 | 0.087 |

|                |                    |                     |              |       |       |       |
|----------------|--------------------|---------------------|--------------|-------|-------|-------|
| 2113Mtp1       | <i>V. vinifera</i> | Aragatzi            | Armenia      | 0.001 | 0.002 | 0.997 |
| 0Mtp429        | <i>V. vinifera</i> | Gora Chirine faux   | Iran         | 0.001 | 0.002 | 0.997 |
| DVIT0428       | <i>V. vinifera</i> | Kandahar            | Unknown      | 0.001 | 0.002 | 0.997 |
| DVIT2323       | <i>V. vinifera</i> | Karadzhandal        | USSR         | 0.001 | 0.002 | 0.997 |
| DVIT0774       | <i>V. vinifera</i> | Katta Kurgan        | USSR         | 0.001 | 0.002 | 0.997 |
| DVIT2605       | <i>V. vinifera</i> | Khorestini          | Pakistan     | 0.001 | 0.002 | 0.997 |
| ARM Q01-16     | <i>V. vinifera</i> | Late Vavilov        | Turkmenistan | 0.001 | 0.002 | 0.997 |
| DVIT2338       | <i>V. vinifera</i> | Rizamat             | Uzbekistan   | 0.001 | 0.002 | 0.997 |
| TYR VI 16-21   | <i>V. vinifera</i> | Shakar Angur        | USSR         | 0.001 | 0.002 | 0.997 |
| 0Mtp1071       | <i>V. vinifera</i> | Soultani            | Uzbekistan   | 0.001 | 0.002 | 0.997 |
|                | <i>V. vinifera</i> | Thompson Seedless   |              | 0.001 | 0.002 | 0.997 |
| DVIT0462       | <i>V. vinifera</i> | Monukka             | Afghanistan  | 0.001 | 0.001 | 0.997 |
| DVIT2322       | <i>V. vinifera</i> | Kara Dzhidzhigi     | Uzbekistan   | 0.001 | 0.004 | 0.996 |
| 2858Mtp1       | <i>V. vinifera</i> | Alia boka           | Uzbekistan   | 0.001 | 0.003 | 0.996 |
| 2001-9-8093-01 | <i>V. vinifera</i> | Asgari 01           | Iran         | 0.001 | 0.003 | 0.996 |
| DVIT2084       | <i>V. vinifera</i> | Khalili             | Afghanistan  | 0.001 | 0.003 | 0.996 |
| TYR VI 14-19   | <i>V. vinifera</i> | Kishmishi           | Unknown      | 0.001 | 0.003 | 0.996 |
| Turkmn 19697   | <i>V. vinifera</i> | Kismish Turkmenskii | Turkmenistan | 0.001 | 0.003 | 0.996 |
| DVIT2680       | <i>V. vinifera</i> | Kouldjinski         | Russia       | 0.001 | 0.003 | 0.996 |
| DVIT0442       | <i>V. vinifera</i> | Lal Sorkh           | Afghanistan  | 0.001 | 0.003 | 0.996 |
| 2783Mtp1       | <i>V. vinifera</i> | Rouchaki            | USSR         | 0.001 | 0.003 | 0.996 |
| 0Mtp587        | <i>V. vinifera</i> | Sahebi              | Afghanistan  | 0.001 | 0.003 | 0.996 |

|              |                    |                           |              |       |       |       |
|--------------|--------------------|---------------------------|--------------|-------|-------|-------|
| DVIT0510     | <i>V. vinifera</i> | Sahibi Sorkh              | Afghanistan  | 0.001 | 0.003 | 0.996 |
| 388Mtp2      | <i>V. vinifera</i> | Sateni tcherny            | Armenia      | 0.001 | 0.003 | 0.996 |
| 2671Mtp1     | <i>V. vinifera</i> | Tchiliaki belyi           | Tajikistan   | 0.001 | 0.003 | 0.996 |
| 2760Mtp1     | <i>V. vinifera</i> | Tuia-tiche                | Uzbekistan   | 0.001 | 0.003 | 0.996 |
| TYR VI 17-17 | <i>V. vinifera</i> | Volgo Don                 | Uzbekistan   | 0.001 | 0.003 | 0.996 |
| DVIT2928     | <i>V. vinifera</i> | Tana-Kuzi                 | Unknown      | 0.002 | 0.002 | 0.996 |
| 2677Mtp2     | <i>V. vinifera</i> | Chakar angour de Tachkent | Uzbekistan   | 0.001 | 0.002 | 0.996 |
| DVIT0402     | <i>V. vinifera</i> | Fahri                     | Afghanistan  | 0.001 | 0.002 | 0.996 |
| HOP L04-19   | <i>V. vinifera</i> | Rish Baba                 | Unknown      | 0.001 | 0.002 | 0.996 |
| 0Mtp1597     | <i>V. vinifera</i> | Sultanine noire faux      | Uzbekistan   | 0.001 | 0.002 | 0.996 |
| DVIT2055     | <i>V. vinifera</i> | Black Kishmish            | Russia       | 0.002 | 0.004 | 0.995 |
| Turkmn 6218  | <i>V. vinifera</i> | Ekdona Turkmenskaya       | Turkmenistan | 0.001 | 0.004 | 0.995 |
| 2780Mtp1     | <i>V. vinifera</i> | Kara Palvan               | Uzbekistan   | 0.001 | 0.004 | 0.995 |
| DVIT0432     | <i>V. vinifera</i> | Khaldar                   | Afghanistan  | 0.001 | 0.004 | 0.995 |
| DVIT0435     | <i>V. vinifera</i> | Kishmishi                 | Afghanistan  | 0.001 | 0.004 | 0.995 |
| 0Mtp589      | <i>V. vinifera</i> | Kisil izium               | Russia       | 0.001 | 0.004 | 0.995 |
| Turkmn 3025  | <i>V. vinifera</i> | Mamidon                   | Turkmenistan | 0.001 | 0.004 | 0.995 |
| TYR VI 15-17 | <i>V. vinifera</i> | Nimrang                   | Russia       | 0.001 | 0.004 | 0.995 |
| 0Mtp1007     | <i>V. vinifera</i> | Sabza angur               | Tajikistan   | 0.001 | 0.004 | 0.995 |
| DVIT0509     | <i>V. vinifera</i> | Sahibi                    | Afghanistan  | 0.001 | 0.004 | 0.995 |
| 0Mtp1010     | <i>V. vinifera</i> | Saïd guliami              | Uzbekistan   | 0.001 | 0.004 | 0.995 |
| 2079Mtp1     | <i>V. vinifera</i> | Shirazi                   | Iran         | 0.001 | 0.004 | 0.995 |

|              |                    |                  |              |       |       |       |
|--------------|--------------------|------------------|--------------|-------|-------|-------|
| DVIT2174     | <i>V. vinifera</i> | Taifi            | USSR         | 0.001 | 0.004 | 0.995 |
| DVIT2071     | <i>V. vinifera</i> | Kishmish Of Vir  | USSR         | 0.002 | 0.003 | 0.995 |
| 2507Mtp1     | <i>V. vinifera</i> | Bouaki nor       | Uzbekistan   | 0.001 | 0.003 | 0.995 |
| DVIT0576     | <i>V. vinifera</i> | Husseine         | Afghanistan  | 0.001 | 0.003 | 0.995 |
| Turkmn 29892 | <i>V. vinifera</i> | Keshmesh Heshrau | Turkmenistan | 0.001 | 0.003 | 0.995 |
| DVIT0431     | <i>V. vinifera</i> | Khalchili        | Afghanistan  | 0.001 | 0.003 | 0.995 |
| TYR VI 17-19 | <i>V. vinifera</i> | Yarghouti        | Unknown      | 0.001 | 0.003 | 0.995 |
| 2856Mtp1     | <i>V. vinifera</i> | Sourkhak biely   | Uzbekistan   | 0.002 | 0.005 | 0.994 |
| 2083Mtp1     | <i>V. vinifera</i> | Askudi           | Iran         | 0.001 | 0.005 | 0.994 |
| 2857Mtp1     | <i>V. vinifera</i> | Chtour angour    | Uzbekistan   | 0.001 | 0.005 | 0.994 |
| Turkmn 13388 | <i>V. vinifera</i> | DK #10           | Turkmenistan | 0.001 | 0.005 | 0.994 |
| DVIT2500     | <i>V. vinifera</i> | Gungargoon       | Pakistan     | 0.001 | 0.005 | 0.994 |
| TYR VI 13-15 | <i>V. vinifera</i> | Huseine Rozvoj   | Unknown      | 0.001 | 0.005 | 0.994 |
| 20008-14 B   | <i>V. vinifera</i> | Kismish Vatkana  | Uzbekistan   | 0.001 | 0.005 | 0.994 |
| 0Mtp1475     | <i>V. vinifera</i> | Liali bidona     | Azerbaijan   | 0.001 | 0.005 | 0.994 |
| DVIT1126     | <i>V. vinifera</i> | Sochal           | USSR         | 0.001 | 0.005 | 0.994 |
| 1748Mtp1     | <i>V. vinifera</i> | Abjouch          | Afghanistan  | 0.002 | 0.004 | 0.994 |
| DVIT0437     | <i>V. vinifera</i> | Kishmish Sorkh   | Afghanistan  | 0.002 | 0.004 | 0.994 |
| 2788Mtp1     | <i>V. vinifera</i> | Pinger putao     | China        | 0.002 | 0.004 | 0.994 |
| Turkmn 3028  | <i>V. vinifera</i> | Gechi Kyrlen     | Turkmenistan | 0.001 | 0.004 | 0.994 |
| 1742Mtp1     | <i>V. vinifera</i> | Monaca           | Afghanistan  | 0.001 | 0.004 | 0.994 |
| DVIT0335     | <i>V. vinifera</i> | Kalamak          | Afghanistan  | 0.003 | 0.003 | 0.994 |

|              |                    |                  |              |       |       |       |
|--------------|--------------------|------------------|--------------|-------|-------|-------|
| Turkmn 13364 | <i>V. vinifera</i> | DK #07           | Turkmenistan | 0.001 | 0.006 | 0.993 |
| Turkmn 6982  | <i>V. vinifera</i> | Kara Terbash     | Turkmenistan | 0.001 | 0.006 | 0.993 |
| Turkmn 6984  | <i>V. vinifera</i> | Mamidon Deli     | Turkmenistan | 0.001 | 0.006 | 0.993 |
| 2952Mtp1     | <i>V. vinifera</i> | Otcha bala       | Uzbekistan   | 0.001 | 0.006 | 0.993 |
| 0Mtp703      | <i>V. vinifera</i> | Matrassa         | Russia       | 0.002 | 0.005 | 0.993 |
| DVIT0416     | <i>V. vinifera</i> | Hassaine         | Unknown      | 0.002 | 0.004 | 0.993 |
| Turkmn 19652 | <i>V. vinifera</i> | Ali Shaitan      | Turkmenistan | 0.001 | 0.007 | 0.992 |
| 0Mtp428      | <i>V. vinifera</i> | Golodan          | Afghanistan  | 0.001 | 0.007 | 0.992 |
| 2663Mtp2     | <i>V. vinifera</i> | Khalili tcherni  | Iran         | 0.001 | 0.007 | 0.992 |
| 2736Mtp1     | <i>V. vinifera</i> | Nimrang rouge    | Uzbekistan   | 0.001 | 0.007 | 0.992 |
| Turkmn 6304  | <i>V. vinifera</i> | Sumbarskii Bekyi | Turkmenistan | 0.001 | 0.007 | 0.992 |
| Turkmn 3026  | <i>V. vinifera</i> | Irtyk Yaprak     | Turkmenistan | 0.002 | 0.006 | 0.992 |
| 2691Mtp1     | <i>V. vinifera</i> | Parkent          | Uzbekistan   | 0.001 | 0.006 | 0.992 |
| DVIT2917     | <i>V. vinifera</i> | Kali Sag         | Unknown      | 0.004 | 0.004 | 0.992 |
| 2690Mtp1     | <i>V. vinifera</i> | Kara Kaltak      | Uzbekistan   | 0.001 | 0.008 | 0.991 |
| Turkmn 18820 | <i>V. vinifera</i> | Kush Dzhumurtka  | Turkmenistan | 0.001 | 0.008 | 0.991 |
| 0Mtp640      | <i>V. vinifera</i> | Liali Yakdona    | Kazakhstan   | 0.001 | 0.008 | 0.991 |
| DVIT2040     | <i>V. vinifera</i> | Ab Jusht         | Afghanistan  | 0.002 | 0.007 | 0.991 |
| 2649Mtp1     | <i>V. vinifera</i> | Noulizok         | Uzbekistan   | 0.001 | 0.007 | 0.991 |
| 0Mtp27       | <i>V. vinifera</i> | Anab-e-Shabi     | India        | 0.001 | 0.009 | 0.99  |
| Turkmn 6977  | <i>V. vinifera</i> | DK Belyi         | Turkmenistan | 0.001 | 0.009 | 0.99  |
| TYR VI 17-07 | <i>V. vinifera</i> | Tarnau           | USSR         | 0.001 | 0.009 | 0.99  |

|                |                    |                       |              |       |       |       |
|----------------|--------------------|-----------------------|--------------|-------|-------|-------|
| 2781Mtp1       | <i>V. vinifera</i> | Kibraïski             | Uzbekistan   | 0.002 | 0.008 | 0.99  |
| 0Mtp610        | <i>V. vinifera</i> | Korza erevani         | Armenia      | 0.002 | 0.008 | 0.99  |
| DVIT0430       | <i>V. vinifera</i> | Halili belij          | Afghanistan  | 0.001 | 0.01  | 0.989 |
| DVIT1070       | <i>V. vinifera</i> | Kule Dary             | Unknown      | 0.001 | 0.01  | 0.989 |
| DVIT0569       | <i>V. vinifera</i> | Dais-el-anz           | Iraq         | 0.001 | 0.009 | 0.989 |
| DVIT2081       | <i>V. vinifera</i> | Kandhari              | India        | 0.003 | 0.008 | 0.989 |
| TYR VI 10-09   | <i>V. vinifera</i> | Anab-E-Shaki          | Unknown      | 0.001 | 0.011 | 0.988 |
| Turkmn 3033    | <i>V. vinifera</i> | Gurgon                | Turkmenistan | 0.002 | 0.01  | 0.988 |
| 1985-0-2415-S1 | <i>V. vinifera</i> | Tufachi S1            | Israel       | 0.002 | 0.01  | 0.988 |
| 2076Mtp1       | <i>V. vinifera</i> | A Kalatchel           | Iran         | 0.001 | 0.01  | 0.988 |
| DVIT1982       | <i>V. vinifera</i> | Dabouki               | Israel       | 0.002 | 0.011 | 0.987 |
| 0Mtp414        | <i>V. vinifera</i> | Kizil sapak           | Turkmenistan | 0.002 | 0.011 | 0.987 |
| 2086Mtp1       | <i>V. vinifera</i> | Blanc d'Iran (Charif) | Iran         | 0.001 | 0.011 | 0.987 |
| DVIT0337       | <i>V. vinifera</i> | Alloued Zeine         | Lebanon      | 0.003 | 0.011 | 0.986 |
| 2659Mtp1       | <i>V. vinifera</i> | Tagobi                | Tajikistan   | 0.001 | 0.014 | 0.985 |
| 2657Mtp1       | <i>V. vinifera</i> | Soïaki                | Uzbekistan   | 0.002 | 0.013 | 0.985 |
| DVIT2171       | <i>V. vinifera</i> | B 15-19               | Unknown      | 0.002 | 0.014 | 0.984 |
| Turkmn 13387   | <i>V. vinifera</i> | DK #11                | Turkmenistan | 0.001 | 0.014 | 0.984 |
| Turkmn 6987    | <i>V. vinifera</i> | Sary Aygyr            | Turkmenistan | 0.001 | 0.017 | 0.982 |
| Turkmn 3036    | <i>V. vinifera</i> | Kara Uzyum Nuhurskii  | Turkmenistan | 0.001 | 0.018 | 0.981 |
| DVIT0685       | <i>V. vinifera</i> | Charas                | USSR         | 0.001 | 0.017 | 0.981 |
| Turkmn 19806   | <i>V. vinifera</i> | Hiv Uzyum             | Turkmenistan | 0.005 | 0.014 | 0.981 |

|                |                    |                                               |              |       |       |       |
|----------------|--------------------|-----------------------------------------------|--------------|-------|-------|-------|
| DVIT2533       | <i>V. vinifera</i> | Nosargoon                                     | Pakistan     | 0.002 | 0.019 | 0.98  |
| Turkmn 13386   | <i>V. vinifera</i> | DK #12                                        | Turkmenistan | 0.001 | 0.019 | 0.98  |
| DVIT2272       | <i>V. vinifera</i> | Pakistan Collection 25237                     | Pakistan     | 0.001 | 0.02  | 0.979 |
| 2845Mtp1       | <i>V. vinifera</i> | Itchkimar biely faux<br>(Collection Kichinev) | Uzbekistan   | 0.004 | 0.017 | 0.979 |
| Turkmn 3030    | <i>V. vinifera</i> | Mellei                                        | Turkmenistan | 0.001 | 0.021 | 0.978 |
| 2982Mtp1       | <i>V. vinifera</i> | Ahmeh Sal apyrène                             | Iran         | 0.002 | 0.02  | 0.978 |
| Turkmn 13360   | <i>V. vinifera</i> | DK #03                                        | Turkmenistan | 0.002 | 0.02  | 0.978 |
| Turkmn 13389   | <i>V. vinifera</i> | DK #2                                         | Turkmenistan | 0.002 | 0.02  | 0.978 |
| DVIT0606       | <i>V. vinifera</i> | Zerk                                          | Iraq         | 0.004 | 0.018 | 0.978 |
| Turkmn 545     | <i>V. vinifera</i> | Kizil Sapak                                   | Turkmenistan | 0.001 | 0.022 | 0.977 |
| DVIT0604       | <i>V. vinifera</i> | Yaghotti No. 1                                | Iran         | 0.001 | 0.023 | 0.976 |
| 1979-0-2219-S1 | <i>V. vinifera</i> | A'asemi S1                                    | Yemen        | 0.003 | 0.02  | 0.976 |
| 2654Mtp1       | <i>V. vinifera</i> | Ranny Vira                                    | Russia       | 0.009 | 0.015 | 0.976 |
| 2074Mtp1       | <i>V. vinifera</i> | Siah                                          | Iran         | 0.002 | 0.024 | 0.975 |
| 746Mtp1        | <i>V. vinifera</i> | Kisil sapak                                   | Russia       | 0.001 | 0.025 | 0.974 |
| Turkmn 30743   | <i>V. vinifera</i> | DK N15 (#15)                                  | Turkmenistan | 0.003 | 0.024 | 0.973 |
| DVIT0384       | <i>V. vinifera</i> | Coudsi                                        | Unknown      | 0.002 | 0.026 | 0.971 |
| DVIT0388       | <i>V. vinifera</i> | Dabouki                                       | Israel       | 0.003 | 0.027 | 0.97  |
| DVIT2452       | <i>V. vinifera</i> | Kwar II                                       | Pakistan     | 0.018 | 0.012 | 0.97  |
| DVIT2072       | <i>V. vinifera</i> | Uzbekistanian Muscat                          | USSR         | 0.006 | 0.025 | 0.969 |
| DVIT0358       | <i>V. vinifera</i> | Baidh Ul Haman                                | Unknown      | 0.002 | 0.031 | 0.966 |

|              |                    |                      |              |       |       |       |
|--------------|--------------------|----------------------|--------------|-------|-------|-------|
| 2679Mtp1     | <i>V. vinifera</i> | Yumalak lelyi        | Uzbekistan   | 0.012 | 0.022 | 0.966 |
| 2897Mtp1     | <i>V. vinifera</i> | Ak ouzioum tapapskii | Russia       | 0.002 | 0.035 | 0.963 |
| 1186Mtp1     | <i>V. vinifera</i> | Chirai obak          | Tajikistan   | 0.002 | 0.036 | 0.962 |
| 0Mtp828      | <i>V. vinifera</i> | Long Yan             | China        | 0.015 | 0.023 | 0.961 |
| 2854Mtp1     | <i>V. vinifera</i> | Oktiabrskii          | Uzbekistan   | 0.002 | 0.038 | 0.96  |
| 2075Mtp1     | <i>V. vinifera</i> | Ozaan Daii           | Iran         | 0.003 | 0.038 | 0.959 |
| DVIT2604     | <i>V. vinifera</i> | Schwin               | Pakistan     | 0.002 | 0.041 | 0.957 |
| 1678Mtp5     | <i>V. vinifera</i> | Kichmich rond        | Turkey       | 0.001 | 0.043 | 0.956 |
| DVIT0563     | <i>V. vinifera</i> | Ajmi                 | Iraq         | 0.008 | 0.037 | 0.955 |
| DVIT0612     | <i>V. vinifera</i> | Ak Schekerek         | Turkmenistan | 0.001 | 0.048 | 0.951 |
| DVIT0417     | <i>V. vinifera</i> | Henab                | Turkey       | 0.002 | 0.049 | 0.949 |
| Turkmn 6971  | <i>V. vinifera</i> | Halili Nobat Niyaz   | Turkmenistan | 0.002 | 0.051 | 0.948 |
| 156Mtp1      | <i>V. vinifera</i> | Baxtiori             | Uzbekistan   | 0.003 | 0.048 | 0.948 |
| 2090Mtp1     | <i>V. vinifera</i> | Sahami               | Iran         | 0.002 | 0.051 | 0.947 |
| TYR VI 13-09 | <i>V. vinifera</i> | Guzal Kara           | Uzbekistan   | 0.003 | 0.054 | 0.944 |
| Turkmn 19735 | <i>V. vinifera</i> | Porsi Shekerek       | Turkmenistan | 0.001 | 0.056 | 0.943 |
| DVIT2509     | <i>V. vinifera</i> | Dalnato I            | Pakistan     | 0.001 | 0.057 | 0.942 |
| 0Mtp1148     | <i>V. vinifera</i> | Tscharma             | Uzbekistan   | 0.002 | 0.073 | 0.925 |
| DVIT0613     | <i>V. vinifera</i> | Chan Isium           | USSR         | 0.001 | 0.076 | 0.922 |
| 635Mtp1      | <i>V. vinifera</i> | Hunisa               | Iran         | 0.003 | 0.079 | 0.918 |
| DVIT2514     | <i>V. vinifera</i> | Neeli                | Pakistan     | 0.08  | 0.005 | 0.915 |
| 2510Mtp1     | <i>V. vinifera</i> | Vassarga tchernaia   | Uzbekistan   | 0.002 | 0.087 | 0.911 |

|                |                    |                           |              |       |       |       |
|----------------|--------------------|---------------------------|--------------|-------|-------|-------|
| DVIT2506       | <i>V. vinifera</i> | Budrilay                  | Pakistan     | 0.002 | 0.097 | 0.901 |
| 2001-9-7097-01 | <i>V. vinifera</i> | Shahani 01                | Iran         | 0.002 | 0.109 | 0.89  |
| Turkmn 21604   | <i>V. vinifera</i> | Mamidon Kizil             | Turkmenistan | 0.001 | 0.109 | 0.89  |
| DVIT2502       | <i>V. vinifera</i> | Parargoon                 | Pakistan     | 0.002 | 0.113 | 0.886 |
| 2001-9-8101-01 | <i>V. vinifera</i> | Mehdi 01                  | Iran         | 0.002 | 0.128 | 0.871 |
| DVIT2499       | <i>V. vinifera</i> | Bargoon                   | Pakistan     | 0.002 | 0.127 | 0.871 |
| DVIT2271       | <i>V. vinifera</i> | Pakistan Collection 25241 | Pakistan     | 0.005 | 0.124 | 0.87  |
| Turkmn 551     | <i>V. vinifera</i> | Kara Uzyum Ashhabadskii   | Turkmenistan | 0.002 | 0.132 | 0.866 |
| DVIT0316       | <i>V. vinifera</i> | Fachren Weis              | USSR         | 0.002 | 0.135 | 0.863 |
| DVIT2085       | <i>V. vinifera</i> | Aswad                     | Yemen        | 0.003 | 0.167 | 0.83  |
| DVIT2505       | <i>V. vinifera</i> | Boyalsing II              | Pakistan     | 0.002 | 0.176 | 0.822 |
| 2664Mtp1       | <i>V. vinifera</i> | Khindogny                 | Iran         | 0.002 | 0.199 | 0.799 |
| 2077Mtp1       | <i>V. vinifera</i> | Yhsouh ali                | Iran         | 0.002 | 0.204 | 0.794 |
| 2675Mtp1       | <i>V. vinifera</i> | Chaani biely              | Azerbaijan   | 0.002 | 0.208 | 0.79  |
| Turkmn 6981    | <i>V. vinifera</i> | Kash Uzyum                | Turkmenistan | 0.002 | 0.216 | 0.782 |
| DVIT2264       | <i>V. vinifera</i> | Pakistan Collection 25311 | Pakistan     | 0.004 | 0.217 | 0.779 |
| DVIT2511       | <i>V. vinifera</i> | Namonia                   | Pakistan     | 0.098 | 0.125 | 0.776 |
| DVIT0608       | <i>V. vinifera</i> | Rhazaki Anatolico         | Greece       | 0.001 | 0.254 | 0.745 |
| DVIT0371       | <i>V. vinifera</i> | Chaouch                   | Turkey       | 0.005 | 0.263 | 0.732 |
| DVIT2512       | <i>V. vinifera</i> | Buraburi                  | Pakistan     | 0.002 | 0.272 | 0.727 |
| 2078Mtp1       | <i>V. vinifera</i> | Sahilii                   | Iran         | 0.001 | 0.296 | 0.703 |
| 1749Mtp1       | <i>V. vinifera</i> | Bayad                     | Yemen        | 0.006 | 0.311 | 0.682 |

|                |                      |                           |              |       |       |       |
|----------------|----------------------|---------------------------|--------------|-------|-------|-------|
| DVIT2045       | <i>V. vinifera</i>   | Nunaka Sia                | Afghanistan  | 0.002 | 0.333 | 0.666 |
| DVIT2534       | <i>V. vinifera</i>   | Kala Kostan               | Pakistan     | 0.31  | 0.028 | 0.662 |
| Turkmn 13362   | <i>V. vinifera</i>   | DK #05                    | Turkmenistan | 0.001 | 0.36  | 0.638 |
| 1752Mtp1       | <i>V. vinifera</i>   | Irki                      | Yemen        | 0.002 | 0.368 | 0.63  |
| 2001-9-8100-01 | <i>V. vinifera</i>   | Kondori 01                | Iran         | 0.002 | 0.377 | 0.621 |
| DVIT2282       | <i>V. vinifera</i>   | Pakistan Collection 25168 | Pakistan     | 0.003 | 0.383 | 0.614 |
| 0Mtp1449       | <i>V. vinifera</i>   | Malahy                    | Iran         | 0.003 | 0.383 | 0.613 |
| TYR VI 17-15   | <i>V. vinifera</i>   | Vitis Vinifera #1359      | Uzbekistan   | 0.002 | 0.388 | 0.61  |
| DVIT1816       | <i>V. sylvestris</i> | O35-64                    | Iran         | 0.318 | 0.079 | 0.603 |
| DVIT2683       | <i>V. vinifera</i>   | Norakert PRG 2224         | Russia       | 0.033 | 0.408 | 0.558 |
| 0Mtp471        | <i>V. vinifera</i>   | Haita safid               | Afghanistan  | 0.002 | 0.451 | 0.547 |
