# Supplementary material for: Identification of mildew resistance in wild and cultivated Central Asian grape germplasm
Source: PubMed Central journal article supplement (PMC3851849; doi:10.1186/1471-2229-13-149), 2013-10-04
Supplement: 1471-2229-13-149-S11.pdf [file 1471-2229-13-149-S11.pdf]

**Supplementary Table S10.** Determination of flower phenotype and genotype. APT3 gene marker distinguished females (F) from males (M) or hermaphrodites (H). SSR marker VVib23 is tightly linked to the flower sex locus and the unique allele 282 is linked to hermaphroditism. With the combination of these two markers, the sex phenotype of a grapevine could be determined without prior knowledge. All bold and italicized flower phenotypes for samples from the Vassal collection were verified with field data.

| Accession ID | Species                | Accession name | Source country | Flower phenotype | Flower genotype | APT3a      | APT3b      | APT3c | APT3d | VVib23a | VVib23b |
|--------------|------------------------|----------------|----------------|------------------|-----------------|------------|------------|-------|-------|---------|---------|
| PI# 588421   | <i>V. yenshanensis</i> | 588421.a       | China          | H                | HF              | 266        | 397        | 466   |       | 272     | 282     |
| PI# 588422   | "                      | 588422.a       | China          | M                | MF or MH        | <b>336</b> | 466        |       |       | 277     | 288     |
| 588650       | "                      | 588650.a       | China          | Undetermined     |                 | MD         |            |       |       | MD      |         |
| 597294.01    | <i>Vitis</i> species   | A-166-003      | China          | M                | MF or MH        | 256        | 266        | 388   | 397   | 272     | 272     |
| GVIT 814     | <i>V. amurensis</i>    | 588452.b       | USSR           | M                | MF or MH        | 266        | 397        | 462   |       | 284     | 294     |
| DVIT1158.1   | "                      |                | China          | M                | MF or MH        | <b>336</b> | 466        |       |       | 284     | 291     |
| DVIT1158.4   | "                      |                | China          | M                | MF or MH        | <b>336</b> | 466        |       |       | 284     | 291     |
| DVIT1157.12  | "                      |                | China          | M                | MF or MH        | <b>336</b> | 466        |       |       | 284     | 288     |
| DVIT1157.2   | "                      |                | China          | F                | FF              | <b>336</b> | <b>336</b> |       |       | 288     | 290     |
| DVIT2005.5   | "                      |                | China          | M                | MF or MH        | <b>336</b> | 466        |       |       | 288     | 288     |
| DVIT1156.2   | "                      |                | China          | M                | MF or MH        | <b>336</b> | 466        |       |       | 284     | 290     |
| DVIT2006.1   | "                      |                | South Korea    | M                | MF or MH        | 266        | 397        | 466   |       | 284     | 294     |
| 597298.01    | <i>Vitis</i> species   | B-166-016      | China          | H                | HF              | <b>336</b> | 466        |       |       | 277     | 282     |
| 588715.01    | "                      | B-166-019      | China          | Undetermined     |                 | MD         |            |       |       | MD      |         |
| DVIT2596.1   | <i>V. betulifolia</i>  |                | China          | H                | HF              | <b>336</b> | 466        |       |       | 282     | 290     |
| 597296.01    | <i>V. romanetii</i>    | C-166-025      | China          | M?               | MF or MH        | <b>336</b> | 466        |       |       | 282     | 282     |
| DVIT2550     | "                      | C-166-026      | China          | F                | FF              | 266        | 266        |       |       | 280     | 280     |
| DVIT3192     | "                      | C-166-043      | China          | M                | MF or MH        | 266        | <b>336</b> | 397   | 466   | 280     | 286     |
| DVIT1159.9   | <i>V. coignetiae</i>   |                | Unknown        | F                | FF              | 266        | <b>336</b> |       |       | 284     | 291     |
| DVIT1159.3   | "                      |                | Unknown        | M?               | MF or MH        | 266        | 462        |       |       | 282     | 286     |
| DVIT1159.10  | "                      |                | Unknown        | F                | FF              | 266        | <b>336</b> | 397   |       | 288     | 294     |
| DVIT2008.5   | <i>V. ficifolia</i>    |                | South Korea    | M                | MF or MH        | 266        | <b>336</b> | 397   | 466   | 272     | 278     |
| DVIT2008.7   | "                      |                | South Korea    | M                | MF or MH        | 266        | 397        | 466   |       | 278     | 294     |
| DVIT1160.7   | "                      |                | China          | M                | MF or MH        | 266        | 397        | 466   |       | 278     | 294     |

|                |                        |                      |              |              |          |            |     |     |     |     |
|----------------|------------------------|----------------------|--------------|--------------|----------|------------|-----|-----|-----|-----|
| DVIT1385       | <i>V. flexouosa</i>    |                      | Unknown      | M            | MF or MH |            |     |     | 276 | 276 |
| 597295.01      | <i>Vitis</i> species   | J-167-048            | China        | M            | MF or MH | 266        | 397 | 466 | 272 | 288 |
| DVIT2349.13    | <i>V. jacquemontii</i> |                      | Pakistan     | H            | HF       | 466        | 466 |     | 282 | 282 |
| DVIT2355.11    | "                      |                      | Pakistan     | H            | HF       | 466        | 466 |     | 282 | 282 |
| DVIT2354.7     | "                      |                      | Pakistan     | H            | HF       | 266        | 466 |     | 282 | 282 |
| TYR VI 13-17   | "                      | Jane De Smirna       | Unknown      | H            | HF       | 266        | 397 | 466 | 282 | 299 |
| DVIT2539       | "                      | Kali Dakh II         | Pakistan     | H            | HF       | 266        | 397 |     | 282 | 299 |
| DVIT1815       | <i>V. lanata</i>       | O35-59               | Afghanistan  | M            | MF or MH | 266        | 466 |     | 284 | 310 |
| DVIT2027       | <i>V. piasezkii</i>    |                      | Asia         | M            | MF or MH | <b>336</b> | 466 |     | 280 | 286 |
| DVIT2032       | "                      |                      | Asia         | M            | MF or MH | 466        | 484 |     | 280 | 290 |
| GVIT 859       | "                      | 597257.03            | China        | M            | MF or MH | <b>336</b> | 466 | 484 | 288 | 288 |
| 2076Mtp1       | <i>V. vinifera</i>     | A Kalatchel          | Iran         | <b>H</b>     | HF       | 266        | 466 |     | 282 | 288 |
| 1979-0-2219-S1 | "                      | A'asemi S1           | Yemen        | H            | HF       | 266        | 397 | 466 | 282 | 288 |
| DVIT2040       | "                      | Ab Jusht             | Afghanistan  | H            | HF       | 266        | 397 | 466 | 282 | 303 |
| 1748Mtp1       | "                      | Abjouch              | Afghanistan  | <b>F</b>     | FF       | 266        | 397 |     |     |     |
| DVIT0305       | "                      | Abla Aganin Isium    | USSR         | Undetermined |          | 266        | 397 |     |     |     |
| TYR VI 10-03   | "                      | Afuz-Ali Urmasti     | Unknown      | H            | HF       | 266        | 466 |     | 282 | 288 |
| 2842Mtp1       | "                      | Ag Kiourdach p.e.    | Azerbaijan   | <b>H</b>     | HF       | 266        | 397 | 466 | 282 | 288 |
| TYR VI 10-05   | "                      | Agaday               | Unknown      | H            | HF       | 266        | 397 | 466 | 282 | 299 |
| 2982Mtp1       | "                      | Ahmeh Sal apyrène    | Iran         | <b>H</b>     | HF       | 266        | 397 | 466 | 282 | 299 |
| DVIT0563       | "                      | Ajmi                 | Iraq         | H            | HF       | 266        | 397 | 466 | 282 | 288 |
| 2897Mtp1       | "                      | Ak ouzioum tapapskii | Russia       | <b>H</b>     | HF       | 266        | 397 | 466 | 282 | 288 |
| DVIT0612       | "                      | Ak Schekerek         | Turkmenistan | H            | HF       | 266        | 397 | 466 | 282 | 288 |
| DVIT0307       | "                      | Al Borla             | USSR         | H            | HF       | 266        | 397 | 466 | 282 | 307 |
| DVIT0634       | "                      | Alburla              | USSR         | H            | HF       | 266        | 397 | 466 | 282 | 307 |
| Turkmn 19652   | "                      | Ali Shaitan          | Turkmenistan | <b>F</b>     | FF       | 266        | 397 |     | 288 | 299 |
| 2858Mtp1       | "                      | Alia boka            | Uzbekistan   | <b>F</b>     | FF       | 266        | 397 |     | 288 | 288 |
| DVIT0337       | "                      | Alloued Zeine        | Lebanon      | H            | HF       | 266        | 397 | 466 | 282 | 282 |

|                |   |                       |             |              |    |     |     |     |     |     |
|----------------|---|-----------------------|-------------|--------------|----|-----|-----|-----|-----|-----|
| 1183Mtp1       | " | Ali tierskii          | Russia      | <b>H</b>     | HF | 266 | 397 | 466 | 282 | 307 |
| DVIT0338       | " | Alulu                 | Iraq        | F            | FF | 266 | 397 |     | 302 | 307 |
| 0Mtp27         | " | Anab-e-Shabi          | India       | <b>H</b>     | HF | 266 | 397 | 466 | 282 | 288 |
| TYR VI 10-09   | " | Anab-E-Shaki          | Unknown     | H            | HF | 266 | 397 | 466 | 282 | 288 |
| 2113Mtp1       | " | Aragatzi              | Armenia     | <b>F</b>     | FF | 266 | 266 |     | 299 | 299 |
| 2001-9-8093-01 | " | Asgari 01             | Iran        | H            | HF | 266 | 397 | 466 | 282 | 288 |
| DVIT0343       | " | Askari                | Afghanistan | H            | HF | 466 | 466 |     | 282 | 282 |
| 2088Mtp1       | " | Askari noir           | Iran        | <b>H</b>     | HF | 266 | 466 |     | 282 | 299 |
| 2083Mtp1       | " | Askudi                | Iran        | <b>H</b>     | HF | 266 | 466 |     |     |     |
| DVIT0308       | " | Asma                  | USSR        | H            | HF | 266 | 397 | 466 | 282 | 307 |
| 2505Mtp1       | " | Assylkara             | Russia      | <b>H</b>     | HF | 266 | 397 | 466 | 282 | 288 |
| DVIT2085       | " | Aswad                 | Yemen       | H            | HF | 266 | 397 | 466 | 282 | 307 |
| DVIT2171       | " | B 15-19               | Unknown     | H            | HF | 266 | 397 | 466 | 282 | 307 |
| DVIT2306       | " | Baharat Early         | India       | H            | HF | 266 | 397 | 466 | 282 | 288 |
| 2271Mtp2       | " | Baian chirei          | Azerbaijan  | <b>H</b>     | HF | 466 | 466 |     | 282 | 282 |
| DVIT0358       | " | Baidh Ul Haman        | Unknown     | H            | HF | 266 | 397 | 466 | 282 | 288 |
| DVIT2499       | " | Bargoon               | Pakistan    | F            | FF | 397 | 397 |     | 288 | 299 |
| DVIT0310       | " | Barmak Isium          | Turkey      | Undetermined |    | 266 | 397 | 466 |     |     |
| 156Mtp1        | " | Baxtiori              | Uzbekistan  | Undetermined |    | 266 | 466 |     |     |     |
| 1749Mtp1       | " | Bayad                 | Yemen       | <b>H</b>     | HF | 266 | 466 |     | 282 | 288 |
| DVIT1841       | " | Beli Potok            | Yugoslavia  | F            | FF | 266 | 397 |     | 286 | 286 |
| DVIT2501       | " | Berurargoon           | Pakistan    | F            | FF | 266 | 397 |     | 288 | 288 |
| 1981-0-2233-S1 | " | Bez el Anza S1        | Egypt       | H            | HF | 466 | 466 |     | 282 | 282 |
| DVIT0311       | " | Bias Kukuzeti         | USSR        | H            | HF | 266 | 397 | 466 | 282 | 307 |
| DVIT2055       | " | Black Kishmish        | Russia      | H            | HF | 266 | 397 | 466 | 282 | 288 |
| 2086Mtp1       | " | Blanc d'Iran (Charif) | Iran        | <b>H</b>     | HF | 266 | 397 | 466 | 282 | 288 |
| DVIT0312       | " | Blanc De Crimei       | USSR        | H            | HF | 266 | 397 | 466 | 282 | 307 |
| 2507Mtp1       | " | Bouaki nor            | Uzbekistan  | <b>H</b>     | HF | 266 | 397 | 466 | 282 | 299 |

|              |   |                           |              |              |    |     |     |     |     |     |
|--------------|---|---------------------------|--------------|--------------|----|-----|-----|-----|-----|-----|
| 2509Mtp1     | " | Boulany                   | Russia       | <b>H</b>     | HF | 266 | 397 | 466 | 282 | 307 |
| DVIT2496     | " | Boyalsing I               | Pakistan     | H            | HF | 266 | 397 | 466 | 282 | 299 |
| DVIT2505     | " | Boyalsing II              | Pakistan     | H            | HF | 266 | 397 | 466 | 282 | 299 |
| DVIT0673     | " | Buaki                     | Russia       | H            | HF | 266 | 397 | 466 | 282 | 288 |
| DVIT2506     | " | Budrilay                  | Pakistan     | F            | FF | 266 | 397 |     | 288 | 299 |
| DVIT2512     | " | Buraburi                  | Pakistan     | H            | HF | 266 | 397 | 466 | 282 | 299 |
| TYR VI 11-13 | " | Caus X Pearl Csaba        | Yugoslavia   | H            | HF | 266 | 397 | 466 | 282 | 288 |
| 2675Mtp1     | " | Chaani biely              | Azerbaijan   | <b>F</b>     | FF | 266 | 266 |     | 299 | 299 |
| 2676Mtp1     | " | Chaani noir               | Azerbaijan   | <b>H</b>     | HF | 266 | 397 | 466 | 282 | 299 |
| 2677Mtp2     | " | Chakar angour de Tachkent | Uzbekistan   | Undetermined |    | 266 | 266 |     |     |     |
| DVIT2730     | " | Chamo                     | Pakistan     | Undetermined |    | 266 | 397 | 466 |     |     |
| DVIT0613     | " | Chan Isium                | USSR         | F            | FF | 266 | 397 |     | 299 | 303 |
| DVIT0371     | " | Chaouch                   | Turkey       | F            | FF | 266 | 397 |     | 288 | 307 |
| DVIT0685     | " | Charas                    | USSR         | F            | FF | 266 | 397 |     | 307 | 307 |
| 0Mtp225      | " | Chassany                  | Azerbaijan   | <b>F</b>     | FF | 266 | 397 |     | 299 | 307 |
| 2678Mtp2     | " | Chirvan chakki            | Azerbaijan   | <b>H</b>     | HF | 266 | 397 | 466 | 282 | 299 |
| Turkmn 16392 | " | Chol Uzyum                | Turkmenistan | H            | HF | 266 | 397 | 466 | 282 | 299 |
| 2857Mtp1     | " | Chtour angour             | Uzbekistan   | <b>H</b>     | HF | 266 | 466 |     | 282 | 288 |
| DVIT2532     | " | Churgoon                  | Pakistan     | H            | HF | 266 | 397 | 466 | 282 | 288 |
| DVIT0313     | " | Cirmisi Sap De Sudak      | USSR         | F            | FF | 266 | 397 |     | 299 | 307 |
| DVIT0384     | " | Coudsi                    | Unknown      | H            | HF | 266 | 397 | 466 | 282 | 288 |
| DVIT1982     | " | Dabouki                   | Israel       | H            | HF | 266 | 397 | 466 | 282 | 288 |
| DVIT0388     | " | Dabouki                   | Israel       | H            | HF | 266 | 397 | 466 | 282 | 288 |
| DVIT0569     | " | Dais-el-anz               | Iraq         | H            | HF | 266 | 397 | 466 | 282 | 299 |
| DVIT2509     | " | Dalnato I                 | Pakistan     | F            | FF | 266 | 397 |     | 288 | 288 |
| DVIT2536     | " | Dardari                   | Pakistan     | F            | FF | 266 | 397 |     | 288 | 288 |
| 857Mtp1      | " | De Hengril                | Russia       | <b>H</b>     | HF | 266 | 397 | 466 | 282 | 299 |
| DVIT0314     | " | Demir Kara                | USSR         | H            | HF | 266 | 397 | 466 | 282 | 288 |

|                |   |                     |              |              |          |            |            |     |     |     |     |
|----------------|---|---------------------|--------------|--------------|----------|------------|------------|-----|-----|-----|-----|
| Turkmn 13358   | " | DK #01              | Turkmenistan | H            | HF       | <b>336</b> | 466        |     | 282 | 282 |     |
| Turkmn 13359   | " | DK #02              | Turkmenistan | H            | HF       | 266        | 397        |     | 282 | 299 |     |
| Turkmn 13360   | " | DK #03              | Turkmenistan | F            | FF       | 266        | 397        |     | 288 | 303 |     |
| Turkmn 13361   | " | DK #04              | Turkmenistan | H            | HF       | 266        | 397        | 466 | 282 | 288 |     |
| Turkmn 13362   | " | DK #05              | Turkmenistan | F            | FF       | 266        | 397        |     | 288 | 288 |     |
| Turkmn 13364   | " | DK #07              | Turkmenistan | M?           | MF or MH | 266        | <b>336</b> | 397 | 466 | 299 | 303 |
| Turkmn 13365   | " | DK #08              | Turkmenistan | M?           | MF or MH | 266        | <b>336</b> | 397 | 466 | 299 | 303 |
| Turkmn 13388   | " | DK #10              | Turkmenistan | Undetermined |          | 266        | 266        |     |     |     |     |
| Turkmn 13387   | " | DK #11              | Turkmenistan | H            | HF       | 266        | <b>336</b> | 466 | 282 | 288 |     |
| Turkmn 13386   | " | DK #12              | Turkmenistan | H            | HF       | 266        | 397        | 466 | 282 | 288 |     |
| Turkmn 13381   | " | DK #17              | Turkmenistan | H            | HF       | 266        | <b>336</b> | 397 | 466 | 282 | 299 |
| Turkmn 13389   | " | DK #2               | Turkmenistan | F            | FF       | 266        | 397        |     | 299 | 303 |     |
| Turkmn 13379   | " | DK #21 Chernyi      | Turkmenistan | H            | HF       | 266        | <b>336</b> | 397 | 466 | 282 | 299 |
| Turkmn 13377   | " | DK #39              | Turkmenistan | H            | HF       | 266        | 397        | 466 | 282 | 288 |     |
| Turkmn 6272    | " | DK #9               | Turkmenistan | F            | FF       | 266        | 397        |     | 288 | 299 |     |
| Turkmn 6977    | " | DK Belyi            | Turkmenistan | H            | HF       | 266        | 397        | 466 | 282 | 288 |     |
| Turkmn 13375   | " | DK Melkii Chernyi   | Turkmenistan | H            | HF       | 266        | 397        | 466 | 282 | 299 |     |
| Turkmn 13374   | " | DK Melkii Krasnyi   | Turkmenistan | M?           | MF or MH | 266        | <b>336</b> | 397 | 466 | 288 | 294 |
| Turkmn 30743   | " | DK N15 (#15)        | Turkmenistan | F            | FF       | 266        | 266        |     | 288 | 299 |     |
| 0Mtp318        | " | Doppelaugen         | Azerbaijan   | F            | FF       | 266        | 397        |     | 288 | 299 |     |
| DVIT0315       | " | Dschan Im Isium     | USSR         | H            | HF       | 266        | 397        | 466 | 282 | 307 |     |
| Turkmn 6218    | " | Ekdona Turkmenskaya | Turkmenistan | H            | HF       | 266        | 397        | 466 | 282 | 299 |     |
| DVIT0316       | " | Fachren Weis        | USSR         | H            | HF       | 266        | 397        | 466 | 282 | 288 |     |
| DVIT0402       | " | Fahri               | Afghanistan  | H            | HF       | 266        | 397        | 466 | 282 | 299 |     |
| DVIT2510       | " | Fatai               | Pakistan     | H            | HF       | <b>336</b> | 466        |     | 282 | 282 |     |
| DVIT2636       | " | Fayoumi             | Egypt        | H            | HF       | 266        | 397        | 466 | 282 | 288 |     |
| 0000-0-4432-S1 | " | Fetyaska S1         | Russia       | H            | HF       | 266        | 397        | 466 | 282 | 307 |     |
| DVIT2537       | " | Gaschochi           | Pakistan     | H            | HF       | 266        | 397        | 466 | 282 | 288 |     |

|              |   |                      |              |          |          |     |            |     |     |     |
|--------------|---|----------------------|--------------|----------|----------|-----|------------|-----|-----|-----|
| Turkmn 3028  | " | Gechi Kyrlen         | Turkmenistan | H        | HF       | 266 | 397        | 466 | 282 | 303 |
| 0Mtp428      | " | Golodan              | Afghanistan  | <b>H</b> | HF       | 266 | 397        | 466 | 282 | 288 |
| 0Mtp429      | " | Gora Chirine faux    | Iran         | <b>H</b> | HF       | 466 | 466        |     | 282 | 282 |
| DVIT0413     | " | Gros Colman          | USSR         | H        | HF       | 266 | 397        | 466 | 282 | 299 |
| DVIT2500     | " | Gungargoon           | Pakistan     | H        | HF       | 266 | 397        | 466 | 282 | 299 |
| Turkmn 3033  | " | Gurgon               | Turkmenistan | H        | HF       | 266 | 397        | 466 | 282 | 288 |
| TYR VI 13-09 | " | Guzal Kara           | Uzbekistan   | H        | HF       | 266 | 397        | 466 | 282 | 288 |
| 0Mtp471      | " | Haita safid          | Afghanistan  | <b>H</b> | HF       | 266 | 466        |     |     |     |
| DVIT0430     | " | Halili belijj        | Afghanistan  | H        | HF       | 266 | 397        | 466 | 282 | 303 |
| Turkmn 6971  | " | Halili Nobat Niyaz   | Turkmenistan | F        | FF       | 266 | 397        |     | 299 | 303 |
| DVIT0416     | " | Hassaine             | Unknown      | H        | HF       | 266 | 397        | 466 | 282 | 288 |
| DVIT0417     | " | Henab                | Turkey       | H        | HF       | 266 | 397        | 466 | 282 | 288 |
| DVIT0328     | " | Himrisnky            | USSR         | H        | HF       | 266 | 397        | 466 | 282 | 299 |
| DVIT0759     | " | Hisakasy             | Russia       | H        | HF       | 266 | 397        | 466 | 282 | 307 |
| Turkmn 19806 | " | Hiv Uzyum            | Turkmenistan | H        | HF       | 266 | 397        | 466 | 282 | 288 |
| DVIT2503     | " | Hosargoon            | Pakistan     | H        | HF       | 266 | 397        | 466 | 282 | 288 |
| 635Mtp1      | " | Hunisa               | Iran         | <b>F</b> | FF       | 266 | 266        |     |     |     |
| TYR VI 13-15 | " | Huseine Rozvoj       | Unknown      | H        | HF       | 266 | 397        | 466 | 282 | 307 |
| 1752Mtp1     | " | Irki                 | Yemen        | <b>H</b> | HF       | 266 | 466        |     | 282 | 299 |
| Turkmn 3026  | " | Irtyk Yaprak         | Turkmenistan | F        | FF       | 266 | 397        |     | 299 | 303 |
| 2845Mtp1     | " | Itchkimar biely faux | Uzbekistan   | <b>F</b> | FF       | 266 | <b>336</b> | 397 | 288 | 299 |
| DVIT2497     | " | Kabuli               | Pakistan     | H        | HF       | 266 | 466        |     | 282 | 288 |
| DVIT2534     | " | Kala Kostan          | Pakistan     | M?       | MF or MH | 266 | <b>336</b> | 397 | 466 | 278 |
| DVIT0335     | " | Kalamak              | Afghanistan  | H        | HF       | 266 | 397        | 466 | 282 | 299 |
| DVIT2917     | " | Kali Sag             | Unknown      | H        | HF       | 266 | 397        | 466 | 282 | 299 |
| DVIT0428     | " | Kandahar             | Unknown      | H        | HF       | 266 | 397        | 466 | 282 | 299 |
| DVIT2081     | " | Kandhari             | India        | H        | HF       | 266 | 397        | 466 | 282 | 299 |
| 0Mtp565      | " | Kanfet isium         | Russia       | <b>H</b> | HF       | 266 | 397        | 466 | 282 | 299 |

|              |   |                         |              |              |          |            |            |     |     |     |     |
|--------------|---|-------------------------|--------------|--------------|----------|------------|------------|-----|-----|-----|-----|
| DVIT2322     | " | Kara Dzhidzhigi         | Uzbekistan   | H            | HF       | 266        | 397        | 466 | 282 | 288 |     |
| 2690Mtp1     | " | Kara Kaltak             | Uzbekistan   | <b>H</b>     | HF       | 266        | 397        | 466 | 282 | 288 |     |
| DVIT0773     | " | Kara Lakana             | USSR         | H            | HF       | 266        | 397        | 466 | 282 | 288 |     |
| 2780Mtp1     | " | Kara Palvan             | Uzbekistan   | Undetermined |          | 266        | 266        |     |     |     |     |
| Turkmn 6982  | " | Kara Terbash            | Turkmenistan | H            | HF       | 266        | 397        | 466 | 282 | 288 |     |
| Turkmn 551   | " | Kara Uzyum Ashhabadskii | Turkmenistan | H            | HF       | 266        | 397        | 466 | 282 | 288 |     |
| Turkmn 3036  | " | Kara Uzyum Nuhurskii    | Turkmenistan | M?           | MF or MH | 266        | <b>336</b> | 397 | 466 | 299 | 303 |
| Turkmn 21551 | " | Karga Dili              | Turkmenistan | H            | HF       | 266        | 397        | 466 | 282 | 299 |     |
| Turkmn 6981  | " | Kash Uzyum              | Turkmenistan | F            | FF       | 266        | 397        |     | 288 | 299 |     |
| DVIT2451     | " | Kashiri                 | Pakistan     | H            | HF       | 266        | 397        | 466 | 282 | 288 |     |
| DVIT0774     | " | Katta Kurgan            | USSR         | F            | FF       | 266        | 266        |     | 288 | 299 |     |
| 2951Mtp1     | " | Kaytagi                 | Russia       | <b>F</b>     | FF       | 266        | 397        |     | 288 | 307 |     |
| 1679Mtp2     | " | Kechmisch aly violet    | Iran         | <b>H</b>     | HF       | 266        | 466        |     | 282 | 299 |     |
| Turkmn 29892 | " | Keshmesh Heshrau        | Turkmenistan | H            | HF       | 266        | 397        | 466 | 282 | 299 |     |
| DVIT0432     | " | Khaldar                 | Afghanistan  | H            | HF       | 266        | 397        | 466 | 282 | 299 |     |
| DVIT2084     | " | Khalili                 | Afghanistan  | F            | FF       | 266        | 397        |     | 288 | 299 |     |
| 2663Mtp2     | " | Khalili tcherni         | Iran         | <b>H</b>     | HF       | 266        | <b>336</b> | 397 | 466 | 282 | 307 |
| 2190Mtp1     | " | Khatmi                  | Russia       | <b>H</b>     | HF       | 266        | 397        | 466 | 282 | 299 |     |
| DVIT2919     | " | Khawngi                 | India        | H            | HF       | <b>336</b> | 466        |     | 278 | 282 |     |
| 2664Mtp1     | " | Khindogny               | Iran         | <b>H</b>     | HF       | 266        | 466        |     | 282 | 299 |     |
| DVIT0434     | " | Khir Ghulaman           | Afghanistan  | H            | HF       | 266        | 397        | 466 | 282 | 299 |     |
| DVIT2605     | " | Khorestini              | Pakistan     | F            | FF       | 266        | 266        |     | 288 | 288 |     |
| 2781Mtp1     | " | Kibraïski               | Uzbekistan   | <b>H</b>     | HF       | 266        | 466        |     | 282 | 307 |     |
| 1678Mtp5     | " | Kichmich rond           | Turkey       | <b>H</b>     | HF       | 266        | 466        |     | 282 | 307 |     |
| DVIT2495     | " | Kini Yatch              | Pakistan     | H            | HF       | 266        | 397        |     | 282 | 299 |     |
| DVIT2071     | " | Kishmish Of Vir         | USSR         | H            | HF       | 266        | 397        | 466 | 282 | 299 |     |
| DVIT0437     | " | Kishmish Sorkh          | Afghanistan  | H            | HF       | 266        | 397        | 466 | 282 | 299 |     |
| TYR VI 14-19 | " | Kishmishi               | Unknown      | F            | FF       | 266        | 397        |     | 288 | 299 |     |

|                |   |                     |              |          |    |            |     |     |     |     |
|----------------|---|---------------------|--------------|----------|----|------------|-----|-----|-----|-----|
| DVIT0435       | " | Kishmishi           | Afghanistan  | H        | HF | 266        | 466 |     | 282 | 299 |
| 0Mtp589        | " | Kisil izium         | Russia       | <b>H</b> | HF | 266        | 466 |     | 282 | 303 |
| 746Mtp1        | " | Kisil sapak         | Russia       | <b>H</b> | HF | 266        | 397 | 466 | 282 | 299 |
| Turkmn 19697   | " | Kismish Turkmenskii | Turkmenistan | H        | HF | 266        | 397 | 466 | 282 | 303 |
| 0Mtp414        | " | Kizil sapak         | Turkmenistan | <b>H</b> | HF | 266        | 466 |     | 282 | 303 |
| Turkmn 545     | " | Kizil Sapak         | Turkmenistan | H        | HF | 266        | 397 | 466 | 282 | 303 |
| 2001-9-8100-01 | " | Kondori 01          | Iran         | H        | HF | 266        | 397 | 466 | 282 | 299 |
| DVIT0783       | " | Koptcha             | Russia       | H        | HF | <b>336</b> | 466 |     | 282 | 307 |
| 0Mtp610        | " | Korza erevani       | Armenia      | <b>H</b> | HF | 266        | 397 | 466 | 282 | 307 |
| DVIT2680       | " | Kouldjinski         | Russia       | H        | HF | 266        | 397 | 466 | 282 | 288 |
| DVIT0329       | " | Kovalewka           | USSR         | H        | HF | 266        | 397 | 466 | 282 | 288 |
| 2635Mtp1       | " | Koz ouzioum         | Russia       | <b>F</b> | FF | 266        | 397 |     | 299 | 307 |
| DVIT1070       | " | Kule Dary           | Unknown      | H        | HF | 266        | 397 | 466 | 282 | 288 |
| Turkmn 18820   | " | Kush Dzhumurtka     | Turkmenistan | H        | HF | 266        | 397 | 466 | 282 | 303 |
| DVIT2452       | " | Kwar II             | Pakistan     | H        | HF | 266        | 397 | 466 | 282 | 288 |
| DVIT0442       | " | Lal Sorkh           | Afghanistan  | F        | FF | 266        | 397 |     | 288 | 299 |
| DVIT2641       | " | Leanoy              | USSR         | H        | HF | 266        | 397 | 466 | 282 | 299 |
| 0Mtp1475       | " | Liali bidona        | Azerbaijan   | <b>F</b> | FF | 266        | 397 |     | 299 | 299 |
| 0Mtp640        | " | Liali Yakdona       | Kazakhstan   | <b>H</b> | HF | 266        | 397 | 466 | 282 | 299 |
| 2640Mtp1       | " | Lkeni noir          | Azerbaijan   | <b>H</b> | HF | 266        | 397 | 466 | 282 | 299 |
| 0Mtp828        | " | Long Yan            | China        | <b>H</b> | HF | 266        | 397 | 466 | 282 | 299 |
| 0Mtp1449       | " | Malahy              | Iran         | <b>F</b> | FF | 266        | 266 |     | 286 | 299 |
| Turkmn 3025    | " | Mamidon             | Turkmenistan | H        | HF | 266        | 397 | 466 | 282 | 303 |
| Turkmn 6984    | " | Mamidon Deli        | Turkmenistan | H        | HF | 266        | 397 | 466 | 282 | 288 |
| Turkmn 21604   | " | Mamidon Kizil       | Turkmenistan | H        | HF | 266        | 397 | 466 | 282 | 288 |
| 0Mtp703        | " | Matrassa            | Russia       | <b>H</b> | HF | 266        | 397 | 466 | 282 | 299 |
| 2001-9-8101-01 | " | Mehdi 01            | Iran         | H        | HF | 266        | 466 |     | 282 | 299 |
| Turkmn 3030    | " | Mellei              | Turkmenistan | H        | HF | 266        | 397 | 466 | 282 | 303 |

|              |   |                           |              |           |    |            |            |     |     |     |     |
|--------------|---|---------------------------|--------------|-----------|----|------------|------------|-----|-----|-----|-----|
| DVIT1042     | " | Mermak                    | Iraq         | H         | HF | 266        | 397        | 466 |     | 282 | 288 |
| 0Mtp1795     | " | Mesisti rose              | Russia       | <b>H</b>  | HF | 266        | 397        | 466 |     | 282 | 299 |
| DVIT2498     | " | Millishun                 | Pakistan     | H         | HF | 266        | <b>336</b> | 397 | 466 | 282 | 282 |
| 1742Mtp1     | " | Monaca                    | Afghanistan  | <b>F</b>  | FF | 266        | 266        |     |     | 299 | 299 |
| DVIT0462     | " | Monukka                   | Afghanistan  | H         | HF | 266        | 397        | 466 |     | 282 | 299 |
| 0Mtp750      | " | Mouchketny                | Russia       | <b>H</b>  | HF | 266        | 466        |     |     | 282 | 307 |
| DVIT0319     | " | Mourvedre Famellestadt    | USSR         | H         | HF | 266        | 397        | 466 |     | 282 | 282 |
| DVIT0320     | " | Murma Isium               | USSR         | H         | HF | 266        | 397        | 466 |     | 282 | 288 |
| TYR VI 15-13 | " | Mzivani                   | Unknown      | H         | HF | 266        | 397        | 466 |     | 282 | 307 |
| DVIT2511     | " | Namonia                   | Pakistan     | H         | HF | 266        | 397        | 466 |     | 282 | 288 |
| 2648Mtp2     | " | Narma                     | Russia       | <b>H</b>  | HF | 266        | 397        | 466 |     | 282 | 299 |
| 0Mtp780      | " | Nassau                    | Russia       | <b>H</b>  | HF | 266        | 466        |     |     | 282 | 288 |
| DVIT2514     | " | Neeli                     | Pakistan     | <b>F?</b> | FF | 266        | 266        |     |     | 282 | 288 |
| DVIT2507     | " | Neelilay                  | Pakistan     | F         | FF | 266        | 397        |     |     | 288 | 299 |
| TYR VI 15-17 | " | Nimrang                   | Russia       | F         | FF | 266        | 397        |     |     | 288 | 299 |
| 2736Mtp1     | " | Nimrang rouge             | Uzbekistan   | <b>H</b>  | HF | 266        | 397        | 466 |     | 282 | 299 |
| DVIT0330     | " | Noir D'automne            | USSR         | H         | HF | 266        | 397        | 466 |     | 282 | 307 |
| DVIT2683     | " | Norakert PRG 2224         | Russia       | H         | HF | <b>336</b> | 466        |     |     | 282 | 303 |
| DVIT2533     | " | Nosargoon                 | Pakistan     | F         | FF | 266        | 397        |     |     | 288 | 299 |
| 2649Mtp1     | " | Noulizok                  | Uzbekistan   | <b>F</b>  | FF | 266        | 266        |     |     | 288 | 288 |
| DVIT2045     | " | Nunaka Sia                | Afghanistan  | H         | HF | 266        | 397        | 466 |     | 282 | 282 |
| 2854Mtp1     | " | Oktiabrskii               | Uzbekistan   | <b>H</b>  | HF | 266        | 397        | 466 |     | 282 | 299 |
| Turkmn 30748 | " | Orion                     | Turkmenistan | H         | HF | <b>336</b> | 466        |     |     | 282 | 294 |
| 2952Mtp1     | " | Otcha bala                | Uzbekistan   | <b>H</b>  | HF | 266        | 397        | 466 |     | 282 | 307 |
| 2075Mtp1     | " | Ozaan Daii                | Iran         | <b>H</b>  | HF | 466        | 466        |     |     | 282 | 282 |
| DVIT2282     | " | Pakistan Collection 25168 | Pakistan     | F         | FF | 266        | 397        |     |     | 288 | 299 |
| DVIT2272     | " | Pakistan Collection 25237 | Pakistan     | F         | FF | 266        | 266        |     |     | 288 | 288 |
| DVIT2271     | " | Pakistan Collection 25241 | Pakistan     | H         | HF | 266        | 397        | 466 |     | 282 | 288 |

|              |   |                           |              |          |    |            |            |     |     |     |     |
|--------------|---|---------------------------|--------------|----------|----|------------|------------|-----|-----|-----|-----|
| DVIT2293     | " | Pakistan Collection 25265 | Pakistan     | H        | HF | 266        | <b>336</b> | 397 | 466 | 282 | 282 |
| DVIT2263     | " | Pakistan Collection 25275 | Pakistan     | H        | HF | 266        | 397        | 466 |     | 282 | 288 |
| DVIT2296     | " | Pakistan Collection 25290 | Pakistan     | H        | HF | 266        | <b>336</b> | 397 | 466 | 282 | 288 |
| DVIT2283     | " | Pakistan Collection 25296 | Pakistan     | H        | HF | 266        | 397        | 466 |     | 282 | 288 |
| DVIT2264     | " | Pakistan Collection 25311 | Pakistan     | F        | FF | 266        | 397        |     |     | 288 | 288 |
| DVIT2502     | " | Parargoon                 | Pakistan     | F        | FF | 266        | <b>336</b> | 397 |     | 288 | 307 |
| 2691Mtp1     | " | Parkent                   | Uzbekistan   | <b>H</b> | HF | 266        | 466        |     |     | 282 | 288 |
| 2597Mtp1     | " | Peikani                   | Iran         | <b>H</b> | HF | 266        | 397        | 466 |     | 282 | 307 |
| DVIT2755     | " | Persian R27               | Unknown      | H        | HF | <b>336</b> | 466        |     |     | 278 | 282 |
| 2651Mtp2     | " | Pervenetz Praskoveisky    | Russia       | <b>H</b> | HF | 266        | 397        | 466 |     | 282 | 307 |
| 2788Mtp1     | " | Pinger putao              | China        | <b>H</b> | HF | 266        | 466        |     |     | 282 | 299 |
| Turkmn 19735 | " | Porsi Shekerek            | Turkmenistan | F        | FF | 266        | 397        |     |     | 288 | 299 |
| 0Mtp928      | " | Précoce d'Astrakan        | Iran         | <b>F</b> | FF | 266        | 397        |     |     | 288 | 307 |
| 0Mtp950      | " | Rajoulan                  | Russia       | <b>H</b> | HF | 266        | 466        |     |     | 282 | 307 |
| 2654Mtp1     | " | Ranny Vira                | Russia       | <b>H</b> | HF | 266        | 397        | 466 |     | 282 | 307 |
| 2737Mtp1     | " | Razakiia piembiana        | Russia       | <b>H</b> | HF | 266        | 397        | 466 |     | 282 | 307 |
| 1750Mtp1     | " | Raziki                    | Yemen        | <b>H</b> | HF | 266        | 397        | 466 |     | 282 | 288 |
| DVIT0499     | " | Red Ohanez                | Russia       | H        | HF | 266        | 397        | 466 |     | 282 | 299 |
| TYR VI 16-09 | " | Rhazaki (Pa 1882)         | Unknown      | H        | HF | 266        | 397        | 466 |     | 282 | 288 |
| DVIT0608     | " | Rhazaki Anatolico         | Greece       | H        | HF | 266        | 466        |     |     | 282 | 307 |
| DVIT0501     | " | Rhazaki De Crete          | Greece       | H        | HF | 266        | 397        | 466 |     | 282 | 288 |
| DVIT0555     | " | Rhazaki Mavro             | Unknown      | H        | HF | 266        | 397        | 466 |     | 282 | 288 |
| HOP L04-19   | " | Rish Baba                 | Unknown      | H        | HF | 266        | 397        | 466 |     | 282 | 299 |
| DVIT2338     | " | Rizamat                   | Uzbekistan   | H        | HF | 266        | 397        | 466 |     | 282 | 299 |
| 2783Mtp1     | " | Rouchaki                  | USSR         | <b>H</b> | HF | 466        | 466        |     |     | 282 | 282 |
| 0Mtp1007     | " | Sabza angur               | Tajikistan   | <b>H</b> | HF | 266        | 397        | 466 |     |     |     |
| 2090Mtp1     | " | Sahami                    | Iran         | <b>H</b> | HF | 466        | 466        |     |     | 282 | 282 |
| 0Mtp587      | " | Sahebi                    | Afghanistan  | <b>H</b> | HF | 266        | 397        | 466 |     | 282 | 299 |

|                |   |                           |              |              |    |            |            |     |     |     |
|----------------|---|---------------------------|--------------|--------------|----|------------|------------|-----|-----|-----|
| DVIT0509       | " | Sahibi                    | Afghanistan  | F            | FF | 266        | 397        |     | 299 | 299 |
| DVIT0510       | " | Sahibi Sorkh              | Afghanistan  | H            | HF | 266        | 397        | 466 | 282 | 288 |
| 2078Mtp1       | " | Sahilii                   | Iran         | <b>H</b>     | HF | 266        | 466        |     |     |     |
| 0Mtp1010       | " | Saïd guliâmi              | Uzbekistan   | <b>F</b>     | FF | 266        | <b>336</b> |     | 299 | 307 |
| DVIT0597       | " | Salomani                  | Iraq         | H            | HF | 266        | 266        |     | 282 | 288 |
| Turkmn 6987    | " | Sary Aygyr                | Turkmenistan | Undetermined |    | 266        | 397        | 466 |     |     |
| 0Mtp1031       | " | Sary Kiriak               | Azerbaijan   | <b>H</b>     | HF | 266        | 397        | 466 | 282 | 288 |
| 388Mtp2        | " | Sateni tcherny            | Armenia      | <b>H</b>     | HF | 466        | 466        |     | 282 | 282 |
| 1737Mtp1       | " | Schiradzouli violet       | Iran         | <b>H</b>     | HF | 466        | 466        |     | 282 | 282 |
| DVIT2604       | " | Schwin                    | Pakistan     | F            | FF | 266        | 397        |     | 299 | 307 |
| DVIT1152       | " | Selection 2798 (seedless) | Yugoslavia   | H            | HF | 266        | 466        |     | 282 | 288 |
| DVIT2685       | " | Sev Lernatu PRG 2224      | Russia       | Undetermined |    |            |            | MD  |     | MD  |
| 2001-9-7097-01 | " | Shahani 01                | Iran         | H            | HF | <b>336</b> | 466        |     | 282 | 282 |
| TYR VI 16-21   | " | Shakar Angur              | USSR         | H            | HF | 266        | 397        | 466 | 282 | 299 |
| DVIT2603       | " | Shingargoon               | Pakistan     | H            | HF | 266        | 397        | 466 | 282 | 299 |
| 2079Mtp1       | " | Shirazi                   | Iran         | <b>H</b>     | HF | 466        | 466        |     | 282 | 282 |
| DVIT2168       | " | Shtur Angur               | USSR         | H            | HF | 266        | 466        |     | 282 | 282 |
| 2074Mtp1       | " | Siah                      | Iran         | <b>H</b>     | HF | 266        | 466        |     |     |     |
| 0Mtp1071       | " | Soultani                  | Uzbekistan   | <b>H</b>     | HF | 266        | 466        |     |     |     |
| 2856Mtp1       | " | Sourkhak biely            | Uzbekistan   | <b>F</b>     | FF | 266        | 266        |     | 288 | 299 |
| 0Mtp1073       | " | Starinky                  | Russia       | <b>H</b>     | HF | 266        | 397        | 466 | 282 | 288 |
| 0Mtp1597       | " | Sultanine noire faux      | Uzbekistan   | <b>H</b>     | HF | 266        | 397        | 466 | 282 | 299 |
| Turkmn 6304    | " | Sumbarskii Bekyi          | Turkmenistan | H            | HF | 266        | 397        | 466 | 282 | 288 |
| 2659Mtp1       | " | Tagobi                    | Tajikistan   | <b>F</b>     | FF | 266        | 266        |     | 288 | 307 |
| DVIT2174       | " | Taifi                     | USSR         | H            | HF | 266        | 397        | 466 | 282 | 299 |
| TYR VI 17-03   | " | Taka Sago                 | Japan        | H            | HF | 266        | 397        | 466 | 280 | 282 |
| DVIT2928       | " | Tana-Kuzi                 | Unknown      | H            | HF | 266        | 397        | 466 | 282 | 299 |
| TYR VI 17-07   | " | Tarnau                    | USSR         | H            | HF | 266        | 397        | 466 | 282 | 299 |

|                |   |                      |            |                  |    |     |            |     |     |     |
|----------------|---|----------------------|------------|------------------|----|-----|------------|-----|-----|-----|
| 1218Mtp1       | " | Tavkveri             | Azerbaijan | <b>F</b>         | FF | 266 | 397        |     | 286 | 288 |
| 664Mtp1        | " | Tchatyrbac           | Uzbekistan | <b>H</b>         | HF | 266 | 266        |     | 282 | 299 |
| DVIT2688       | " | Tchilar              | Russia     | H                | HF | 466 | 466        |     | 282 | 282 |
| 2671Mtp1       | " | Tchiliaki belyi      | Tajikistan | <b>H</b>         | HF | 266 | 466        |     | 282 | 288 |
|                | " | Thompson Seedless    |            | H                | HF | 266 | 397        | 466 | 282 | 299 |
| 1985Mtp2       | " | Tolstokory           | Russia     | <b>F</b>         | FF | 266 | 397        |     | 299 | 299 |
| DVIT2531       | " | Torgoon              | Pakistan   | H                | HF | 266 | 397        | 466 | 282 | 288 |
| 0000-0-2411-S1 | " | Trapanlarin kara S1  | USSR       | H                | HF | 266 | 397        |     | 282 | 288 |
| 0Mtp1148       | " | Tscharma             | Uzbekistan | <b>H</b>         | HF | 266 | 466        |     | 282 | 288 |
| 1985-0-2415-S1 | " | Tufachi S1           | Israel     | H                | HF | 266 | 466        |     | 282 | 288 |
| 2760Mtp1       | " | Tuia-tiche           | Uzbekistan | <b>H</b>         | HF | 266 | 397        | 466 | 282 | 299 |
| 654Mtp1        | " | Tuia-tiche p.e.      | Russia     | <b>F</b>         | FF | 266 | 397        |     | 288 | 299 |
| TYR VI 17-11   | " | Uzbekistan Muscat    | Unknown    | F                | FF | 266 | 397        |     | 286 | 299 |
| DVIT2072       | " | Uzbekistanian Muscat | USSR       | H                | HF | 266 | 466        |     | 282 | 288 |
| 0Mtp1165       | " | Varuschkin           | Russia     | <b>H</b>         | HF | 266 | 397        | 466 | 282 | 286 |
| TYR VI 17-15   | " | Vitis Vinifera #1359 | Uzbekistan | H                | HF | 266 | 397        | 466 | 282 | 307 |
| 1983-0-2424-S1 | " | Voivoginiova S1      | USSR       | H                | HF | 266 | 397        | 466 | 282 | 299 |
| TYR VI 17-17   | " | Volgo Don            | Uzbekistan | H                | HF | 266 | 397        | 466 | 282 | 288 |
| DVIT0604       | " | Yaghotti No. 1       | Iran       | H                | HF | 266 | 397        | 466 | 282 | 299 |
| 2687Mtp1       | " | Ya'i izium rose      | Russia     | <b>H</b>         | HF | 266 | 397        | 466 | 282 | 307 |
| TYR VI 17-19   | " | Yarghouti            | Unknown    | H                | HF | 266 | 397        | 466 | 282 | 288 |
| 2077Mtp1       | " | Yhsouh ali           | Iran       | <b><u>F?</u></b> | FF | 266 | <b>336</b> | 397 | 282 | 299 |
| 2679Mtp1       | " | Yumalak lelyi        | Uzbekistan | <b>H</b>         | HF | 266 | 466        |     |     |     |
| DVIT0606       | " | Zerk                 | Iraq       | H                | HF | 266 | 397        | 466 | 282 | 288 |
| 2666Mtp1       | " | Zimlinsky noir       | Russia     | <b>H</b>         | HF | 266 | 397        | 466 | 282 | 288 |
| DVIT2664       | " | Zimsko Belo          | Yugoslavia | H                | HF | 266 | 397        | 466 | 282 | 307 |
