# Supplementary material for: Identification of mildew resistance in wild and cultivated Central Asian grape germplasm
Source: PubMed Central journal article supplement (PMC3851849; doi:10.1186/1471-2229-13-149), 2013-10-04
Supplement: 1471-2229-13-149-S12.pdf [file 1471-2229-13-149-S12.pdf]

- |                       |                                                                                     |                                                                                                                                                             |
|-----------------------|-------------------------------------------------------------------------------------|-------------------------------------------------------------------------------------------------------------------------------------------------------------|
| 1) O33-60 (DVIT1802)  |    | White fruit, hermaphrodite, collected from Shirvan, Iran.                                                                                                   |
| 2) O34-16 (DVIT1803)  |    | Black fruit, female, collected from Shirvan, Iran.                                                                                                          |
| 3) O34-26 (DVIT1805)  |    | Black fruit, <b>male</b> based on the allelic pattern with APT3 and VVIb23 markers, carried wild 336 (bp) allele, collected from unknown location in Iran.  |
| 4) O34-29 (DVIT1804)  |    | Black fruit, hermaphrodite, collected from Shirvan, Iran.                                                                                                   |
| 5) O34-55 (DVIT1807)  |    | Black fruit, <b>male</b> based on the allelic pattern with APT3 and VVIb23 markers, carried wild 336 (bp) allele , collected from unknown location in Iran. |
| 6) O35-07 (DVIT1808)  |    | Black fruit, female, carried wild 336 (bp) allele , collected from unknown location in Iran.                                                                |
| 7) O35-41 (DVIT1811)  |    | White fruit, female, collected from unknown location in Iran.                                                                                               |
| 8) O35-47 (DVIT1812)  |  | Black fruit, <b>male</b> based on the allelic pattern with APT3 and VVIb23 markers, collected from unknown location in Iran.                                |
| 9) O35-50 (DVIT1813)  |  | White fruit, hermaphrodite, collected from Iran.                                                                                                            |
| 10) O35-64 (DVIT1816) |  | White fruit, hermaphrodite, collected from Iran.                                                                                                            |
